# Supplementary material for: Integrating Genome-Scale Metabolic Models with Patient Plasma Metabolome to Study Endothelial Metabolism In Situ
Source: Preprints.org preprint supplement (doi:10.20944/preprints202403.0136.v1), 2024-03-04

**PCA of Patient 1**

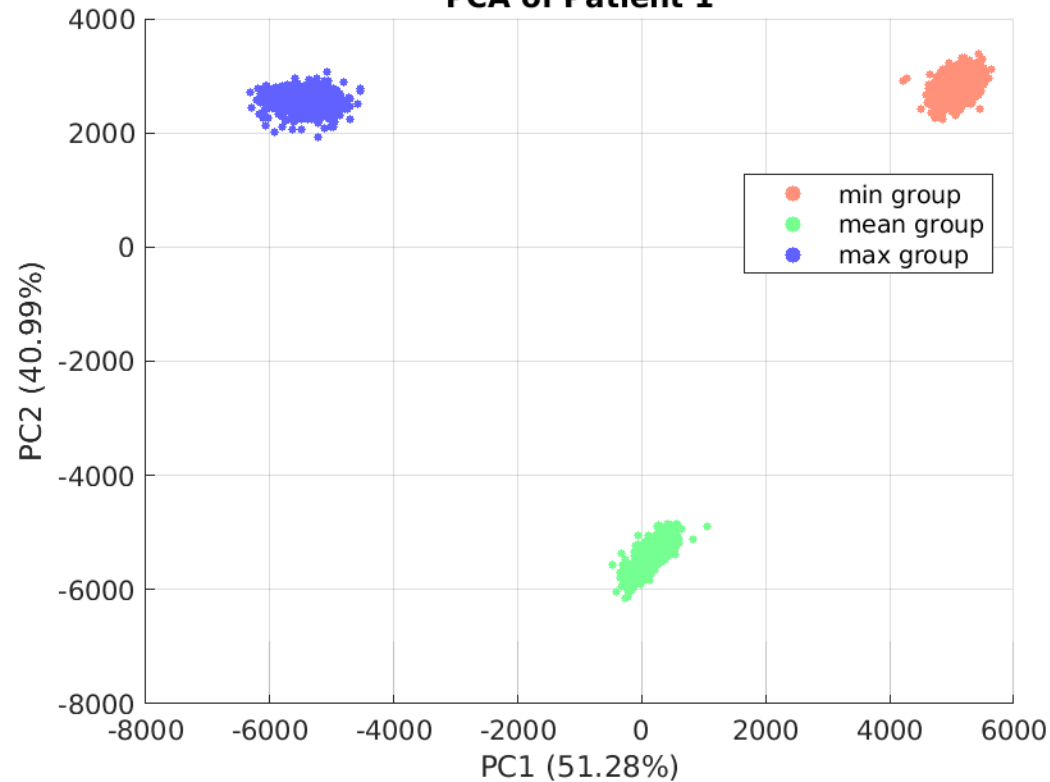

**PCA of Patient 2**

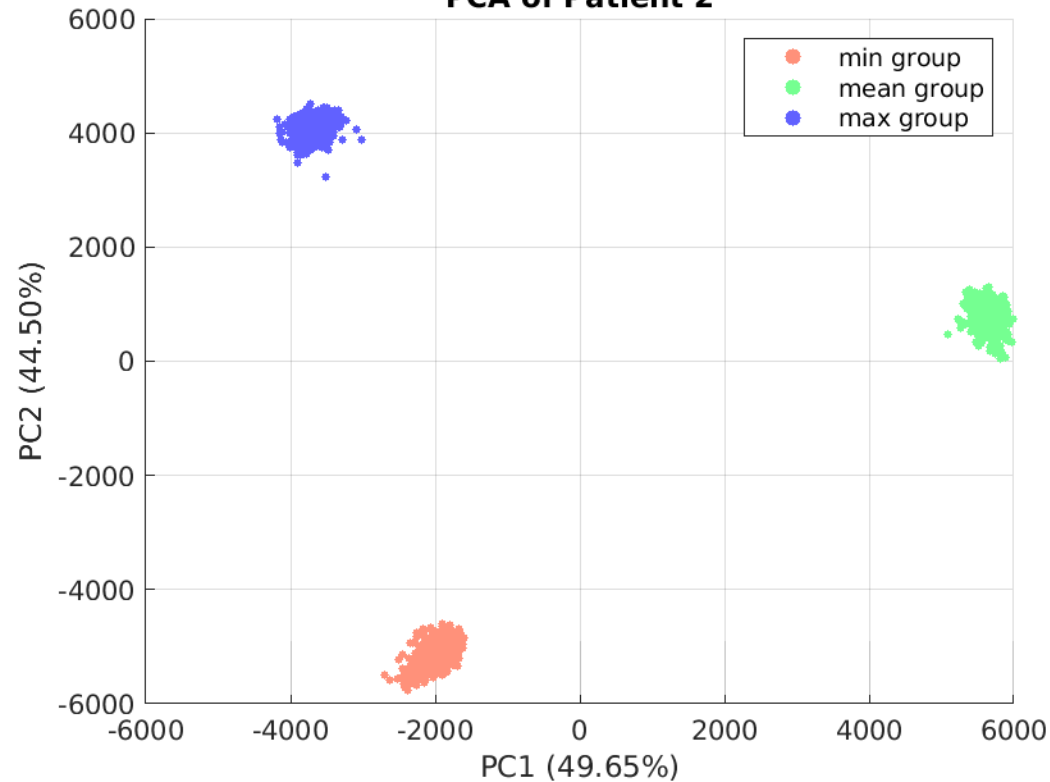

**PCA of Patient 3**

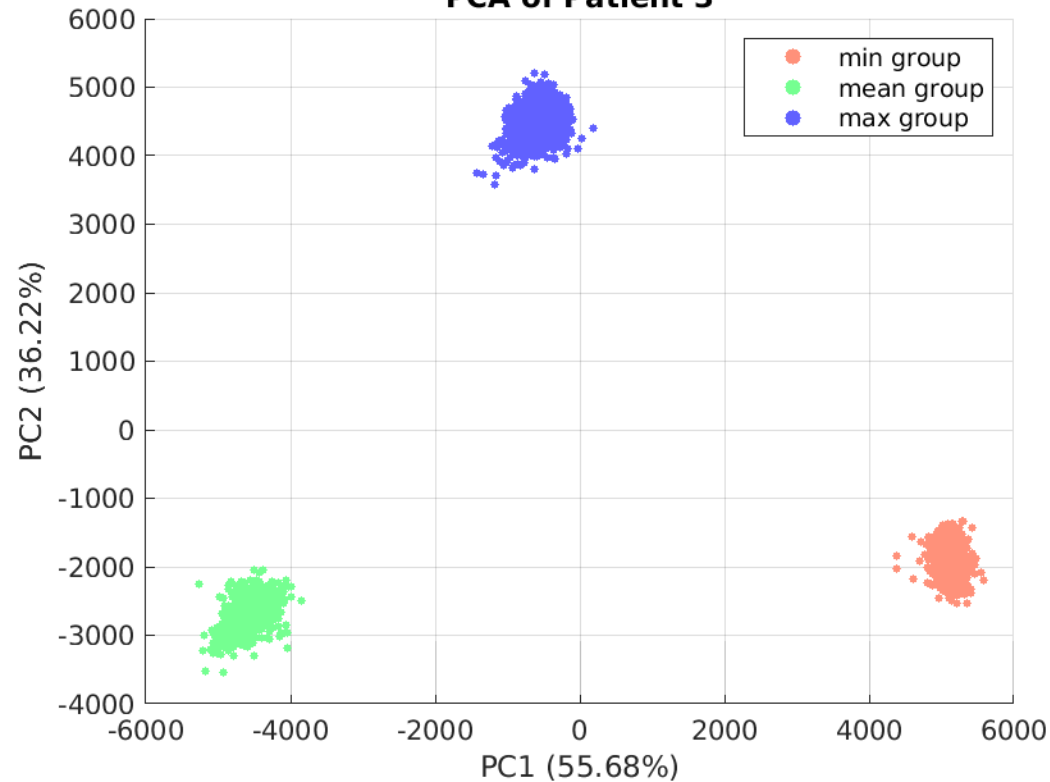

**PCA of Patient 4**

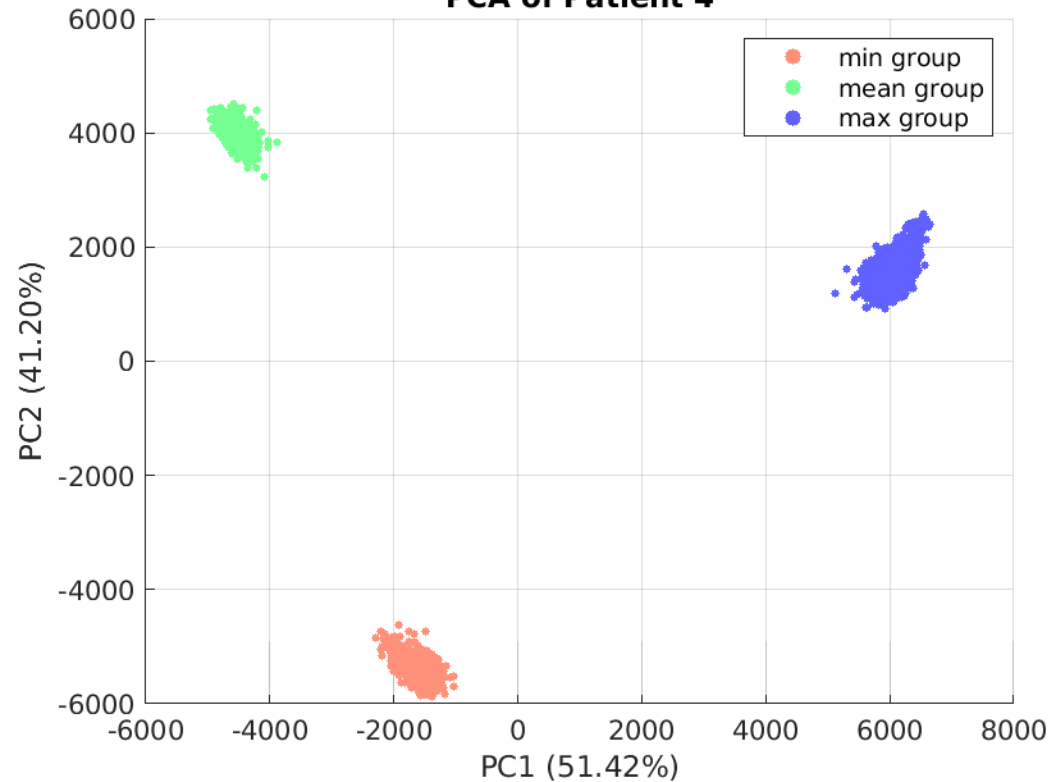

**PCA of Patient 5**

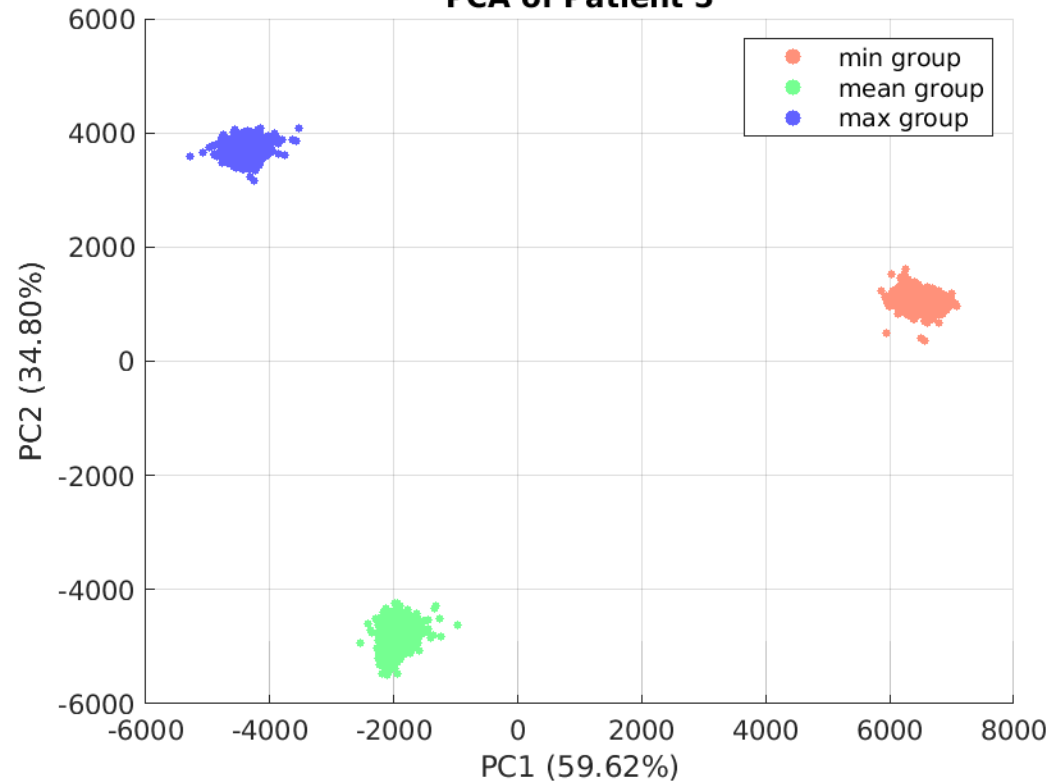

**PCA of Patient 6**

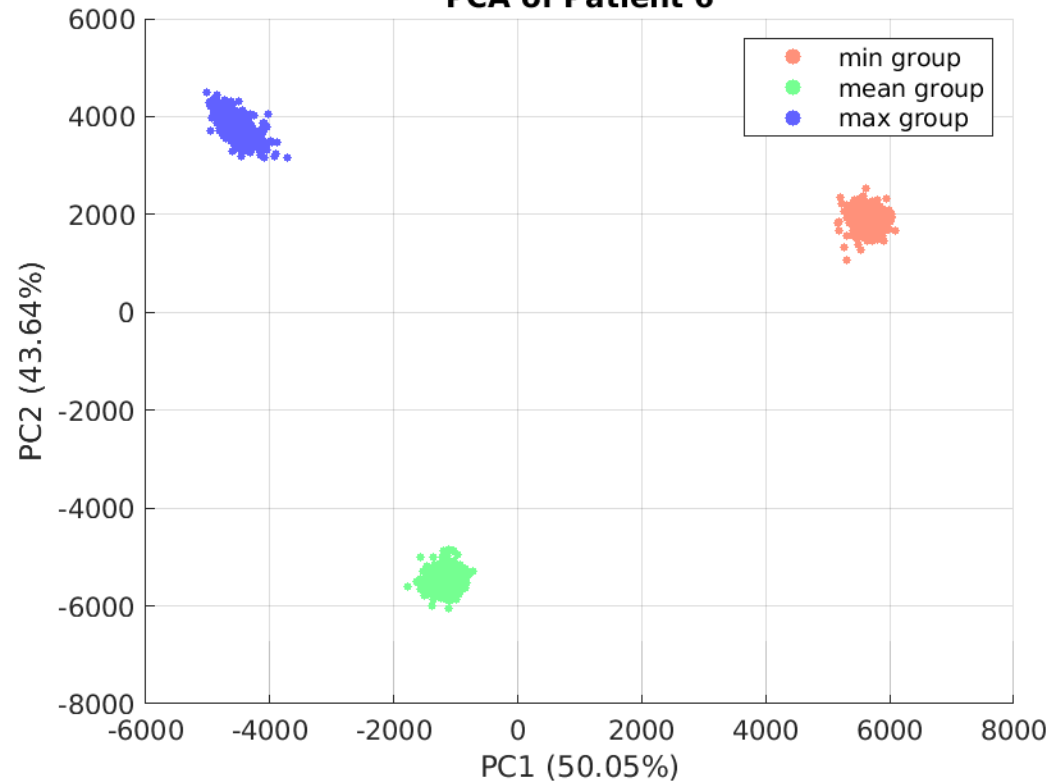

**PCA of Patient 7**

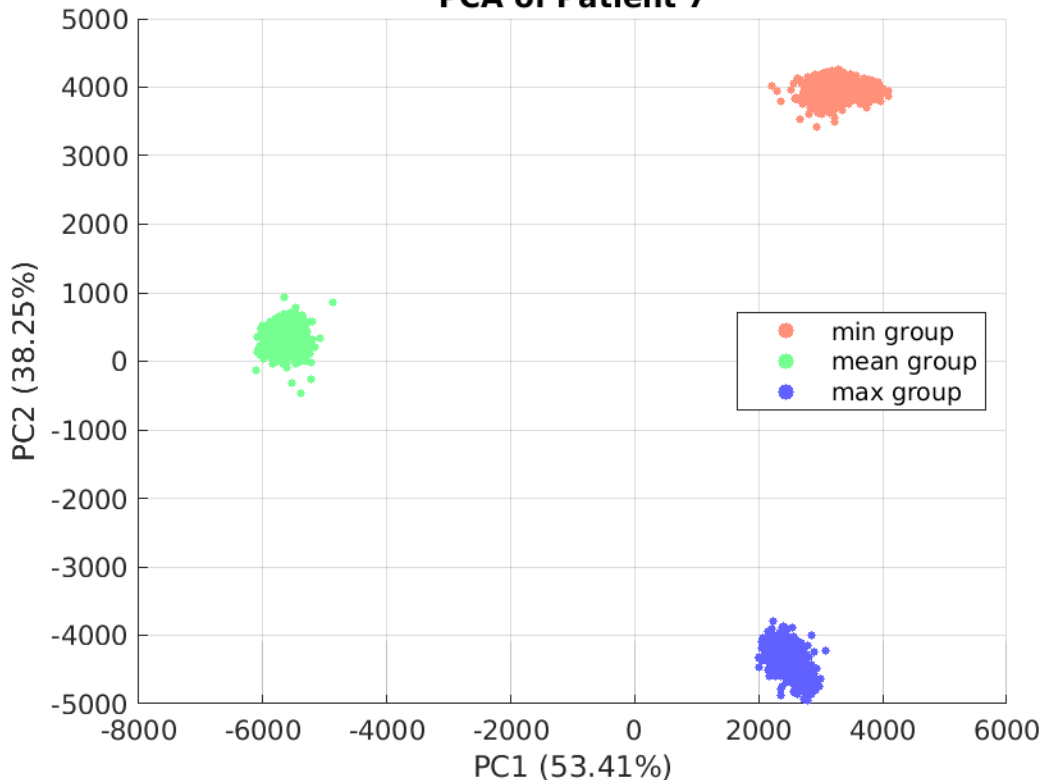

**PCA of Patient 8**

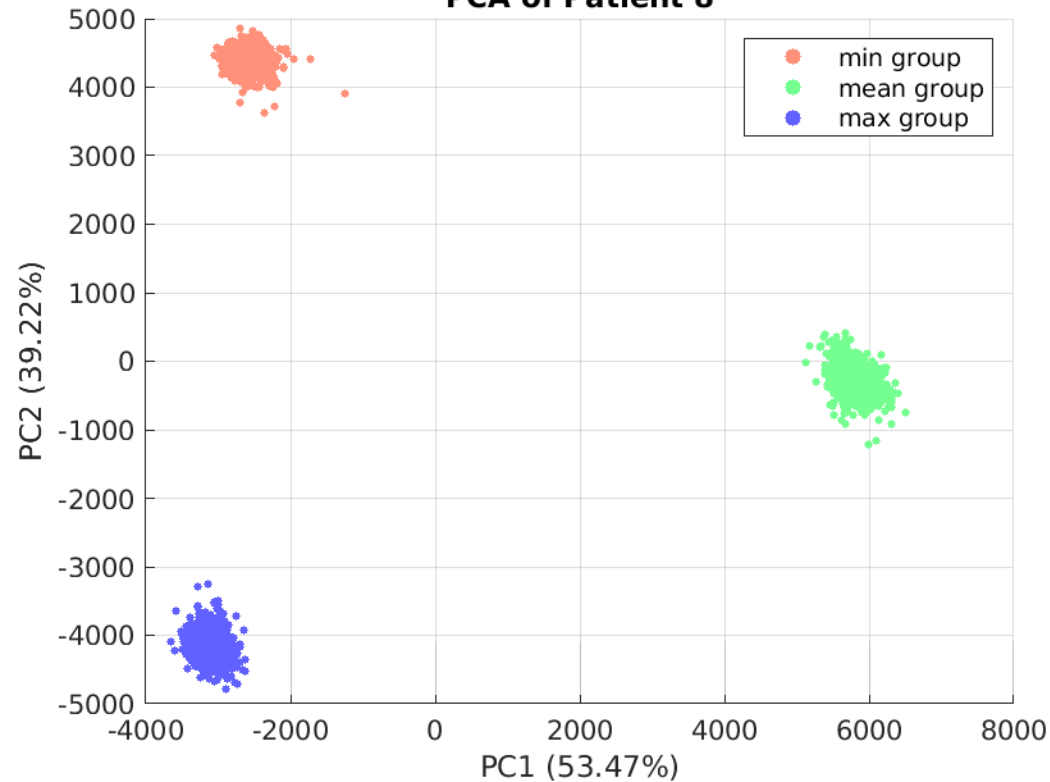



**PCA of Patient 9**

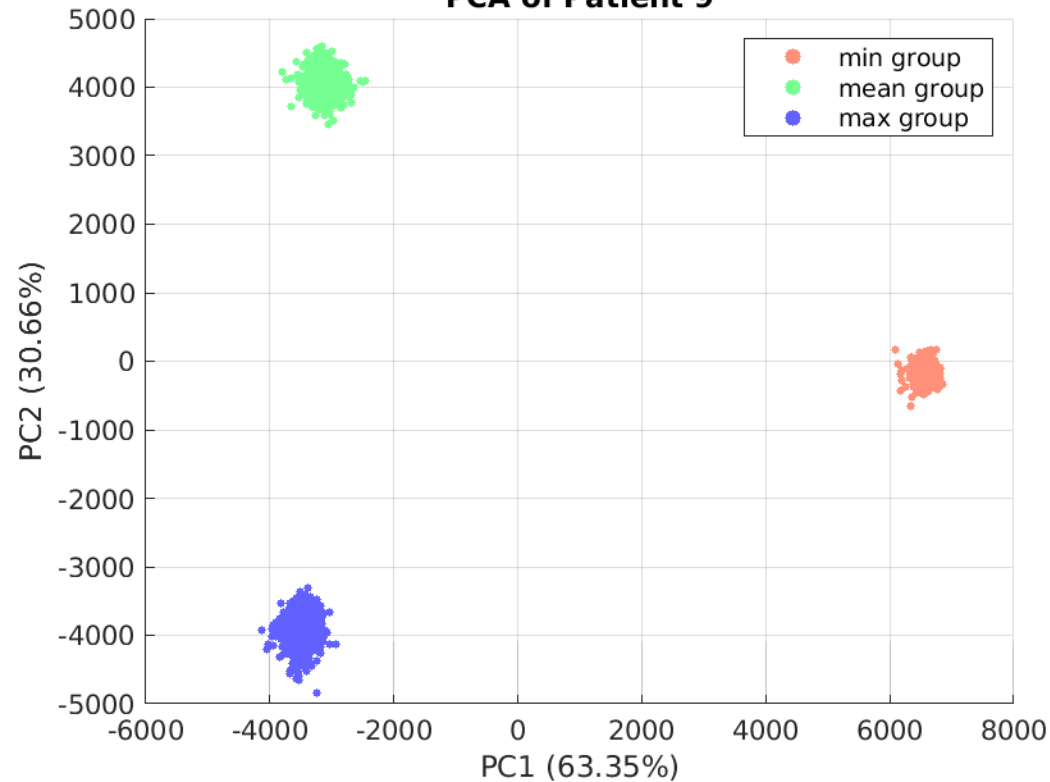

**PCA of Patient 10**

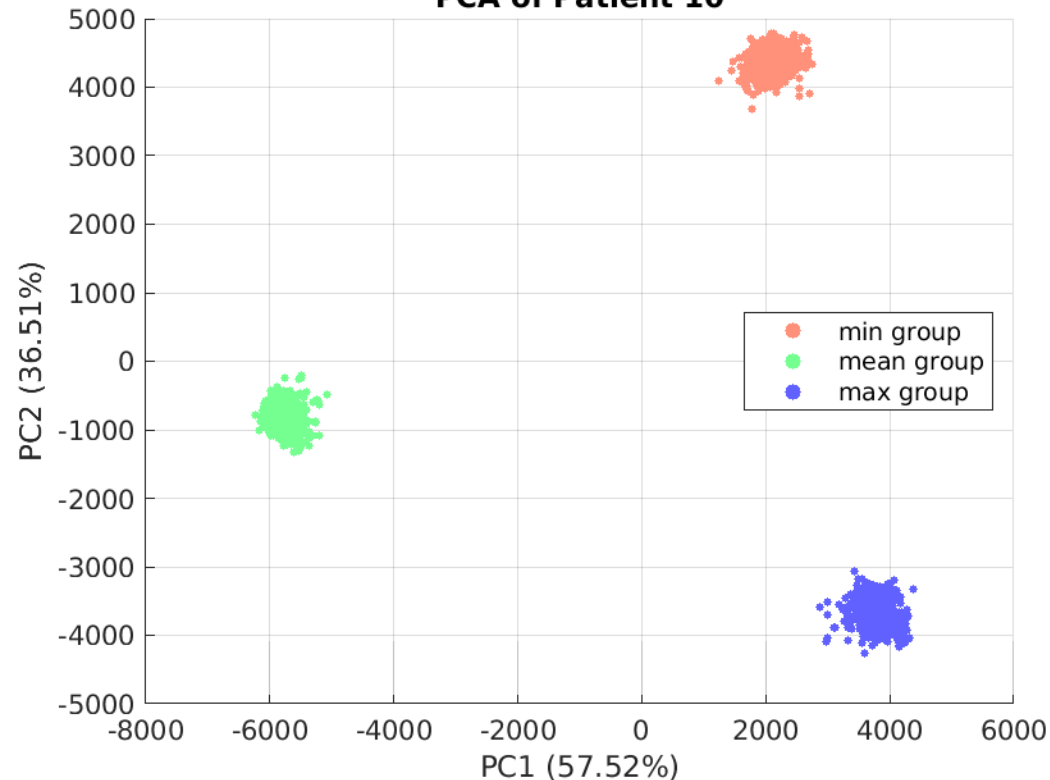

**PCA of Patient 11**

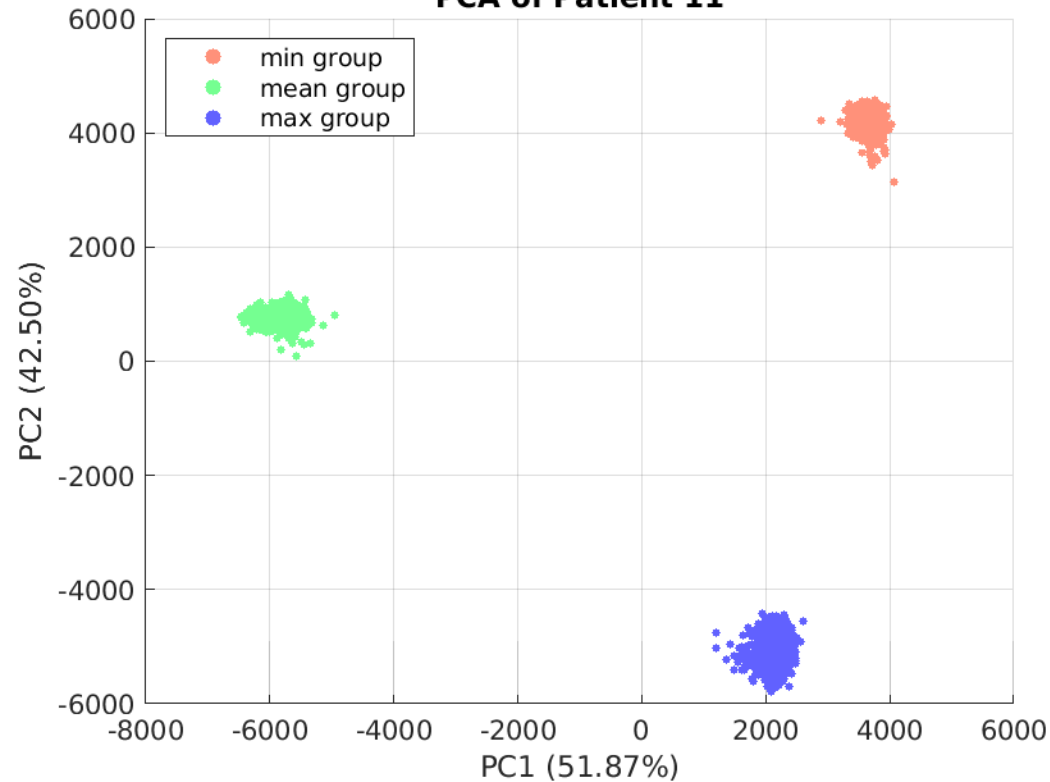

**PCA of Patient 12**

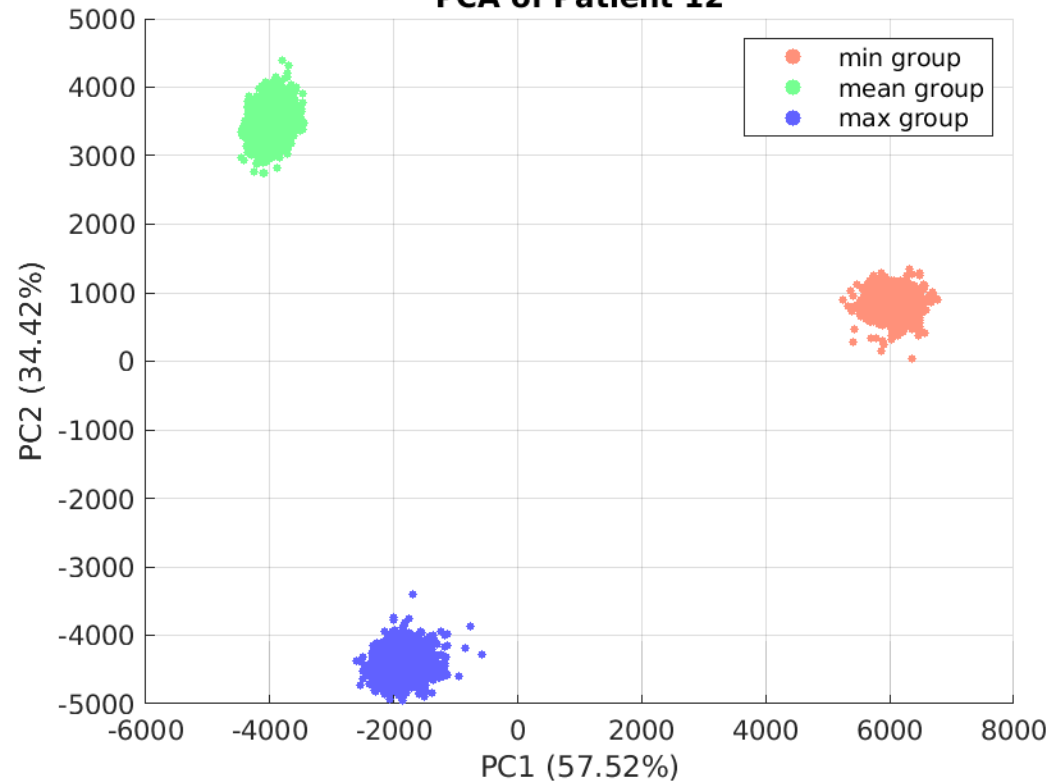

**PCA of Patient 13**

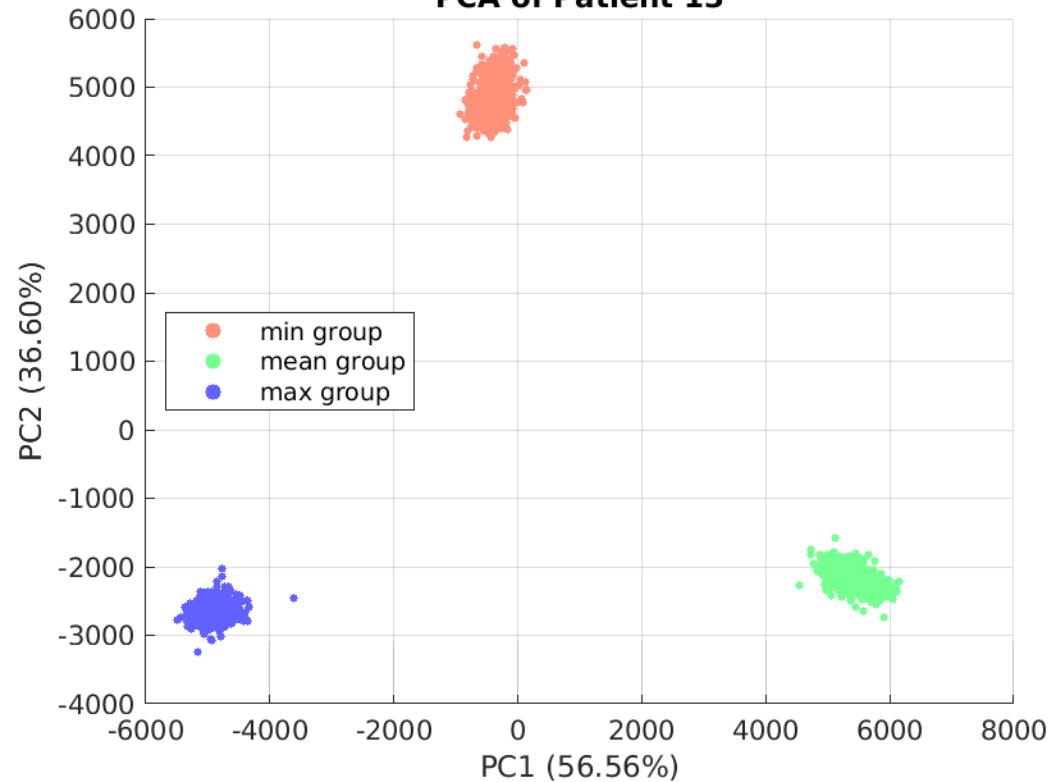

**PCA of Patient 14**

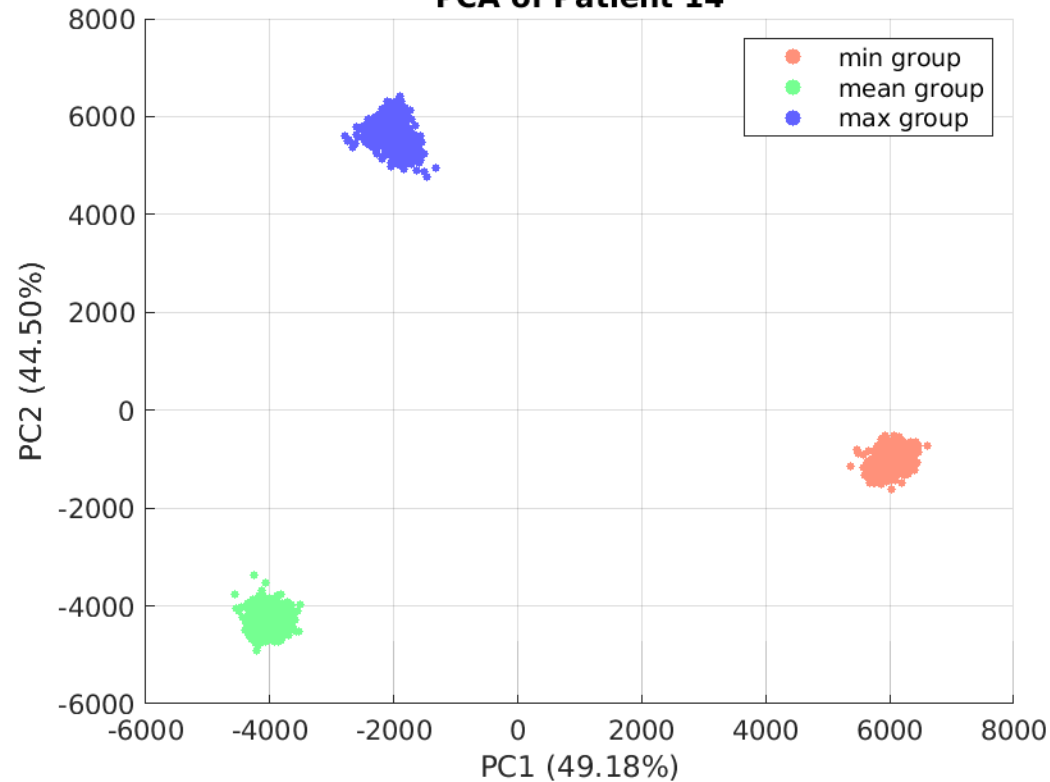

**PCA of Patient 15**

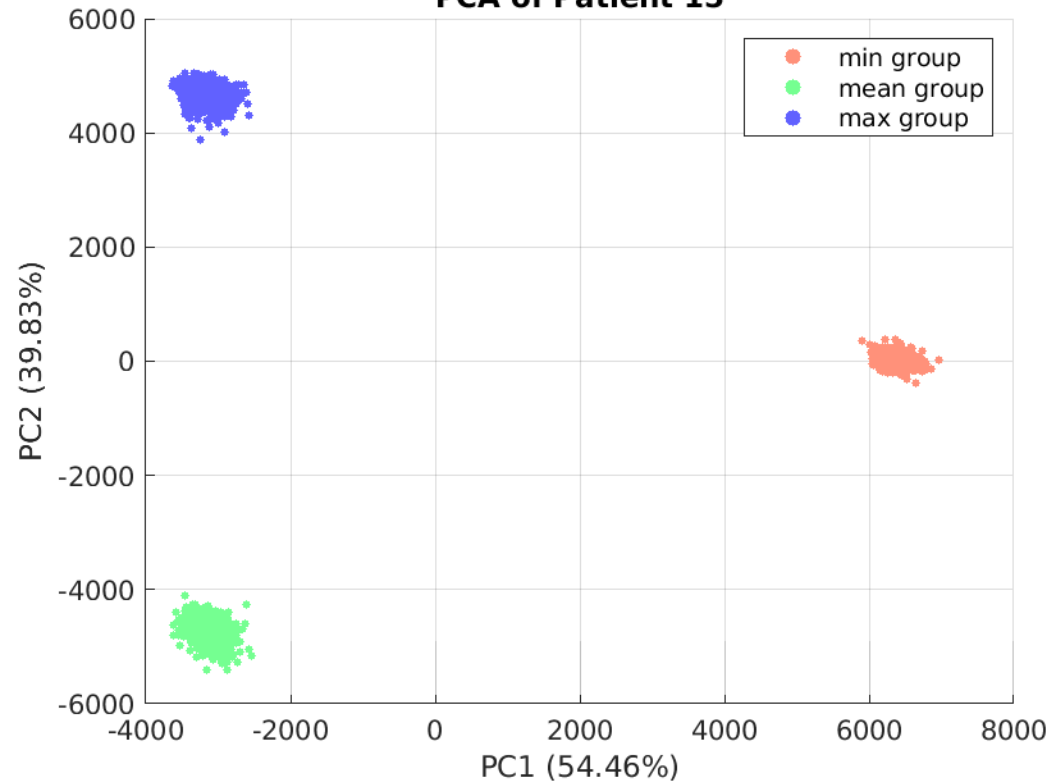

**PCA of Patient 16**

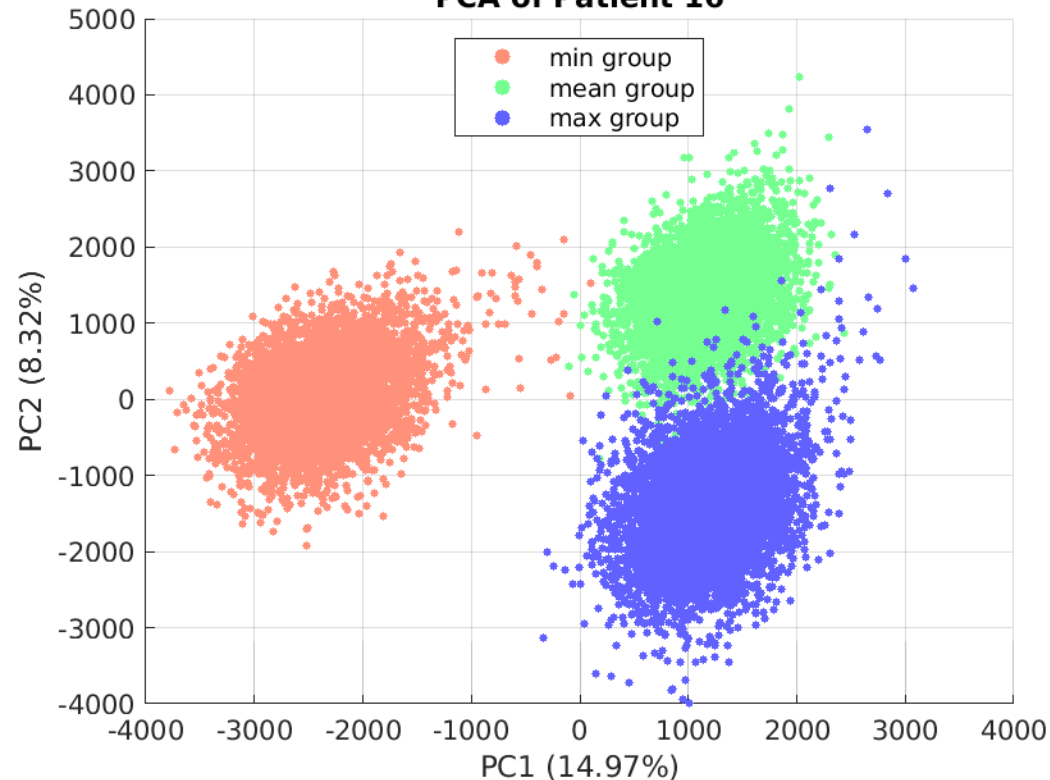



**PCA of Patient 17**

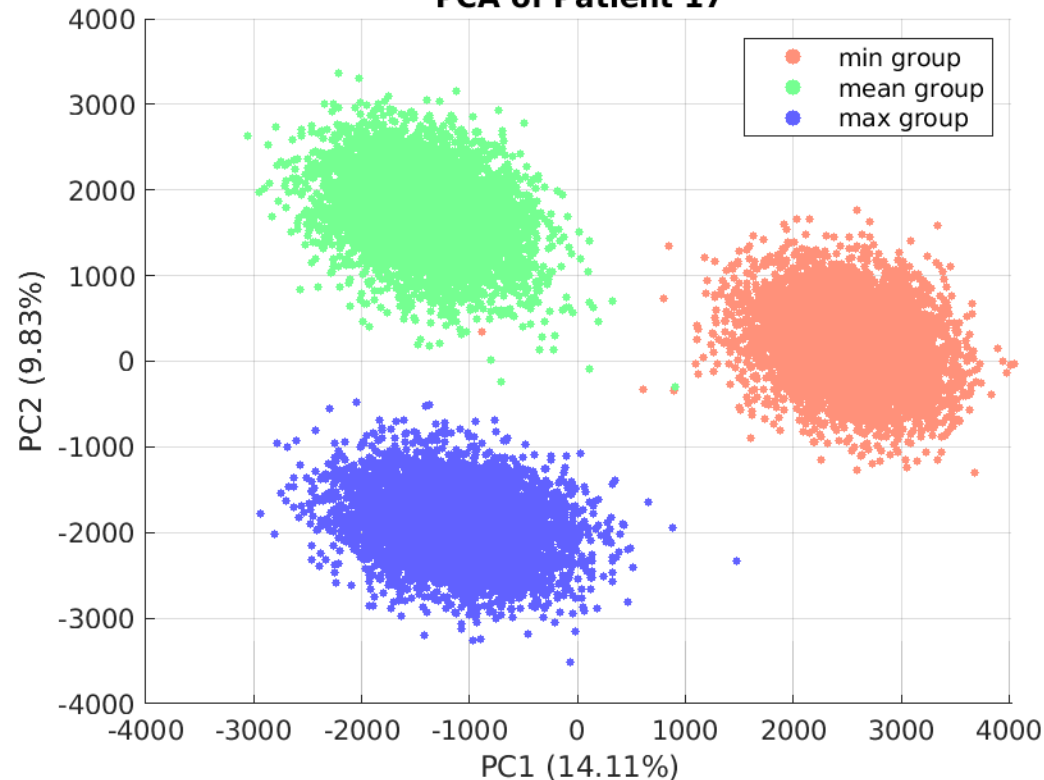

**PCA of Patient 18**

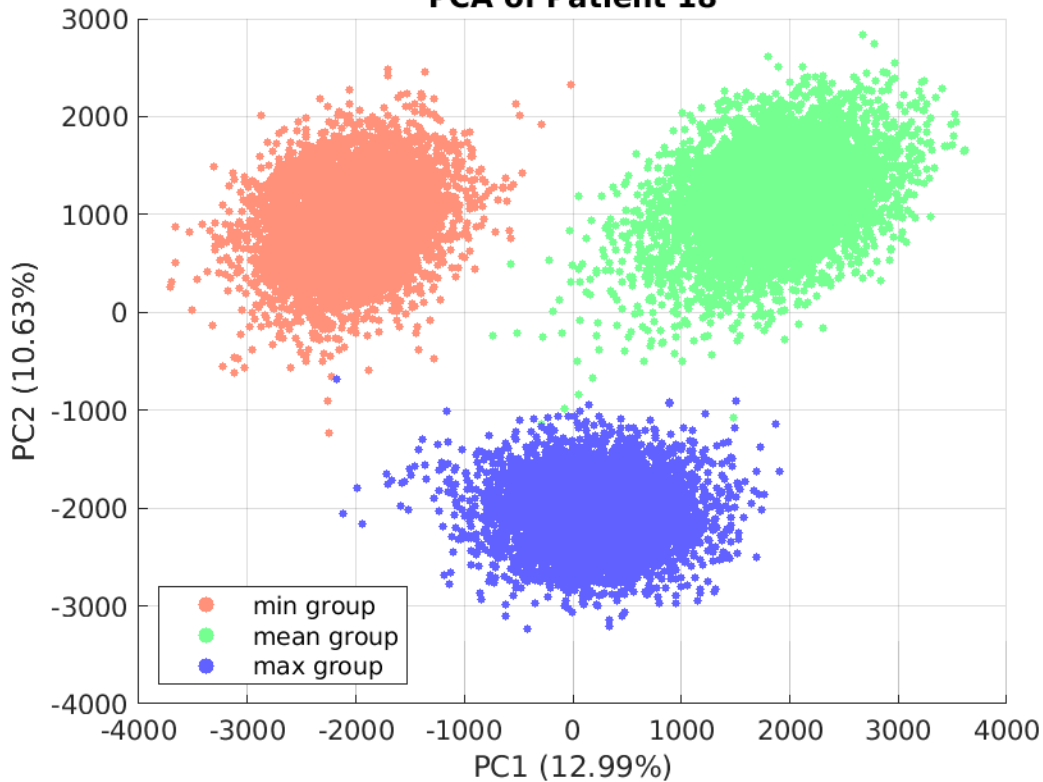

**PCA of Patient 19**

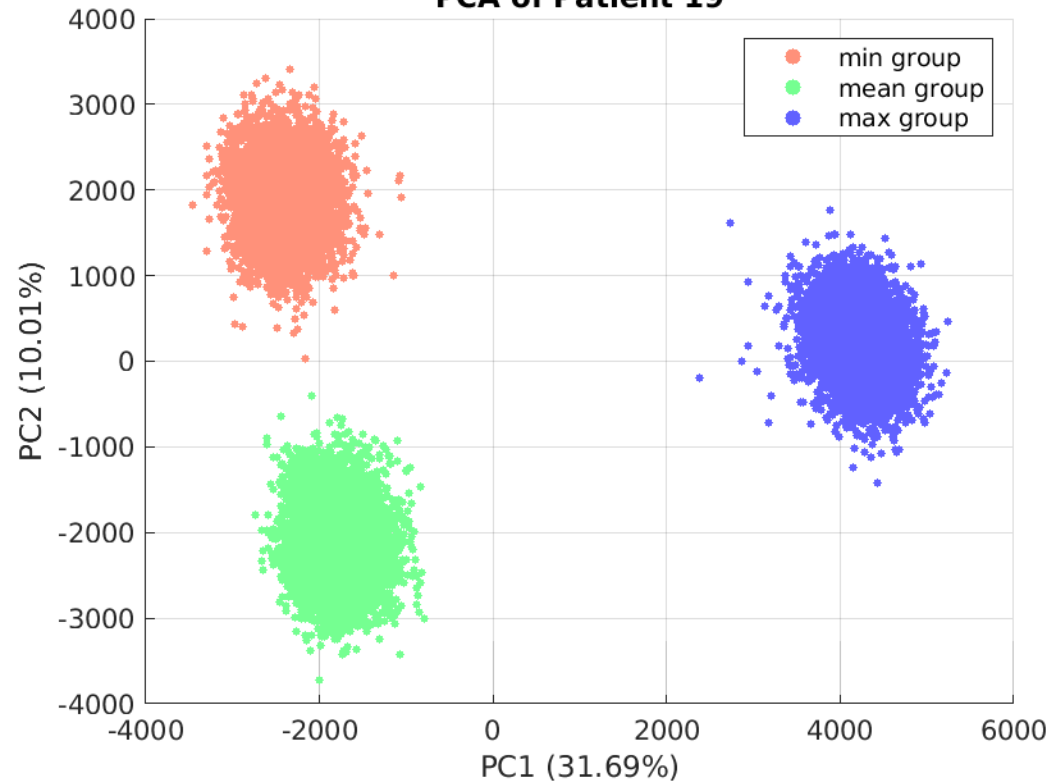

**PCA of Patient 20**

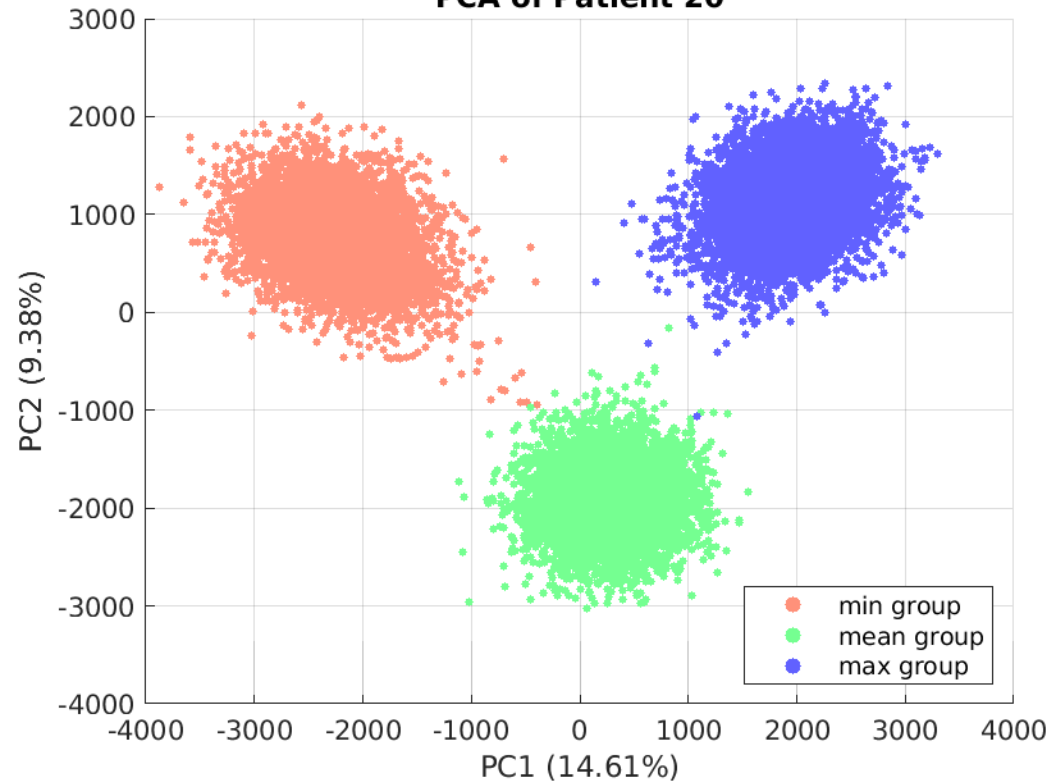

**PCA of Patient 21**

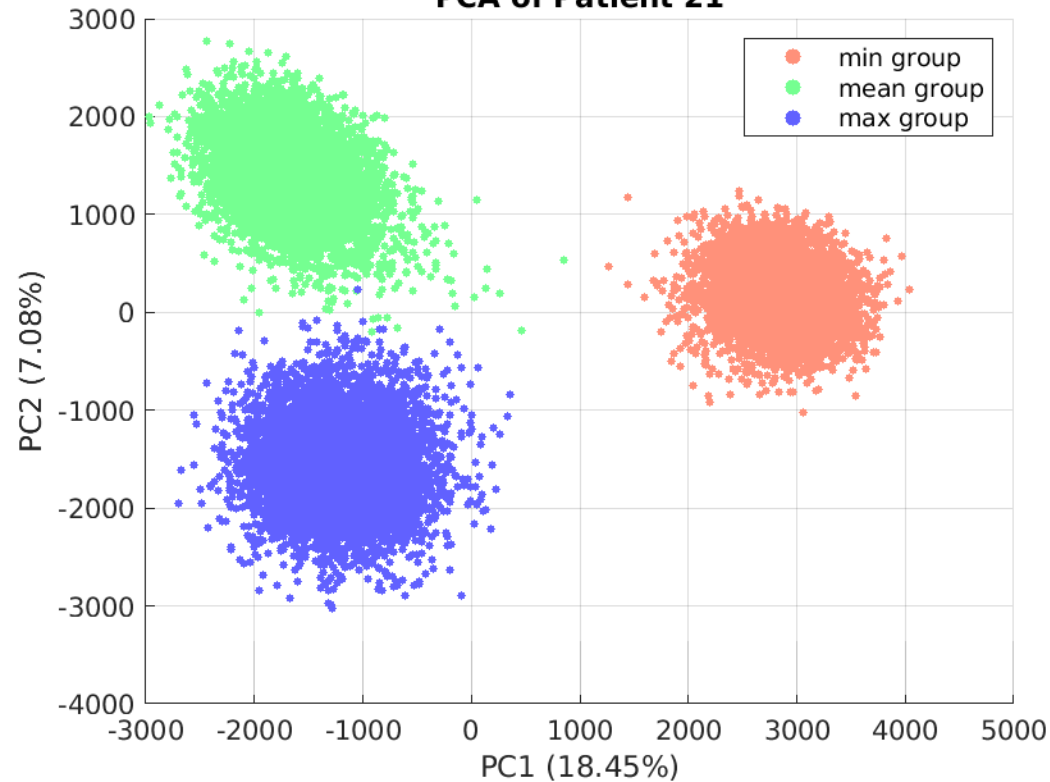

**PCA of Patient 22**

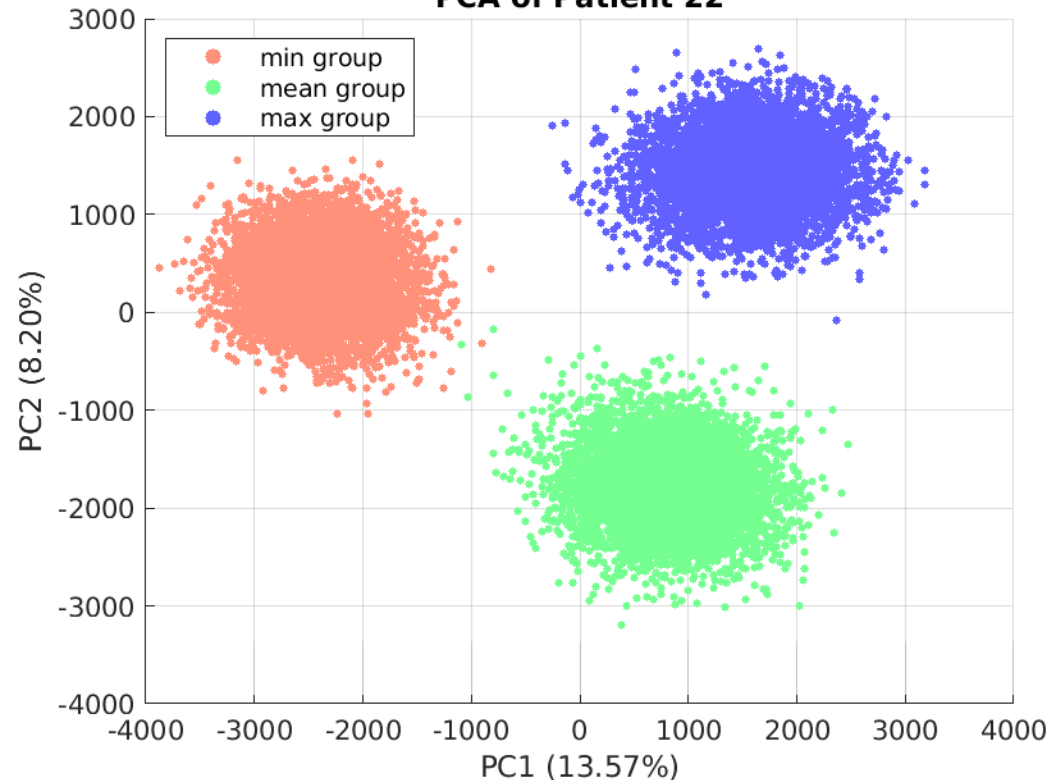

**PCA of Patient 23**

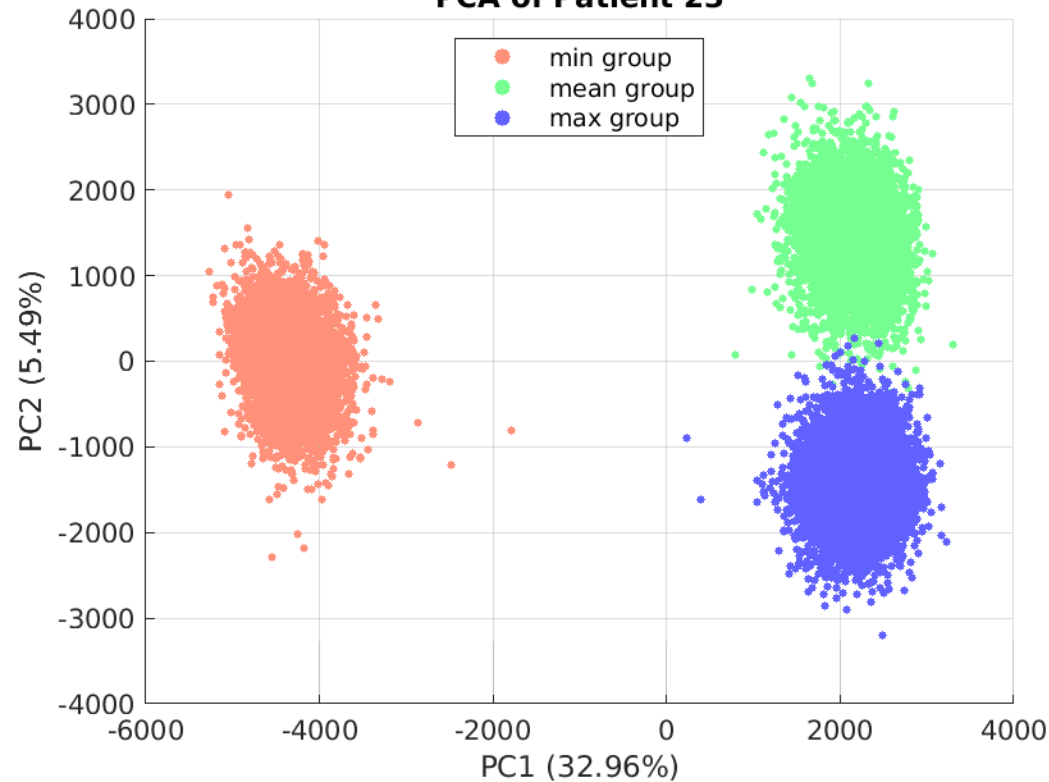

**PCA of Patient 24**

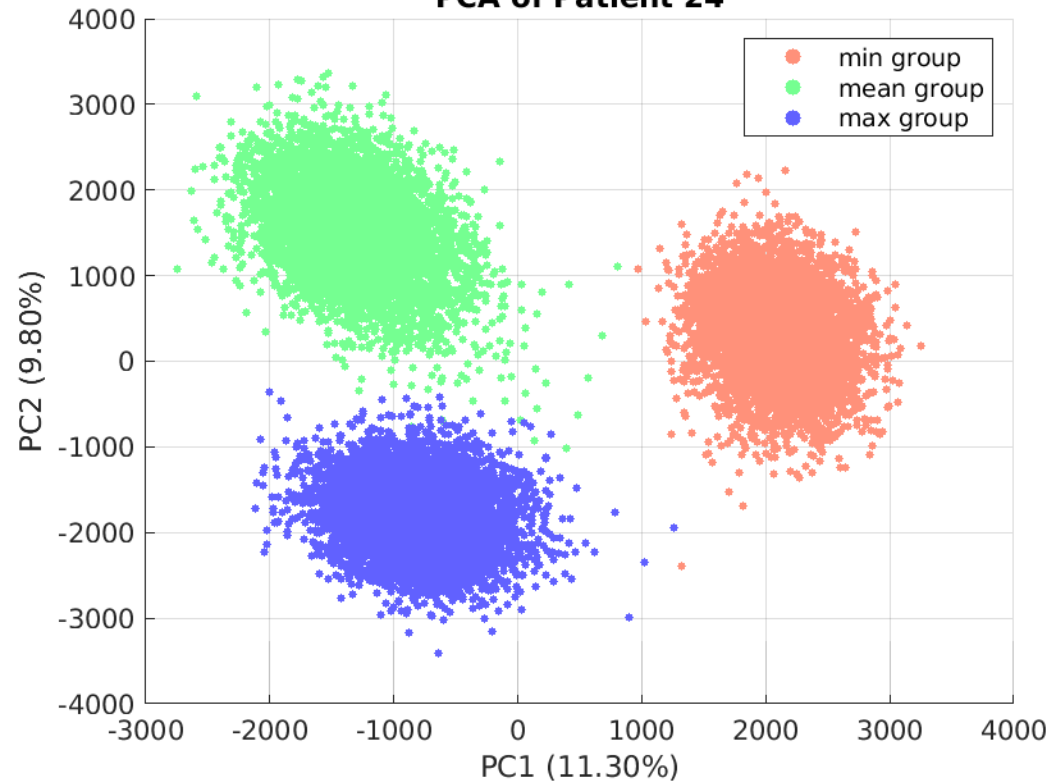



**PCA of Patient 25**

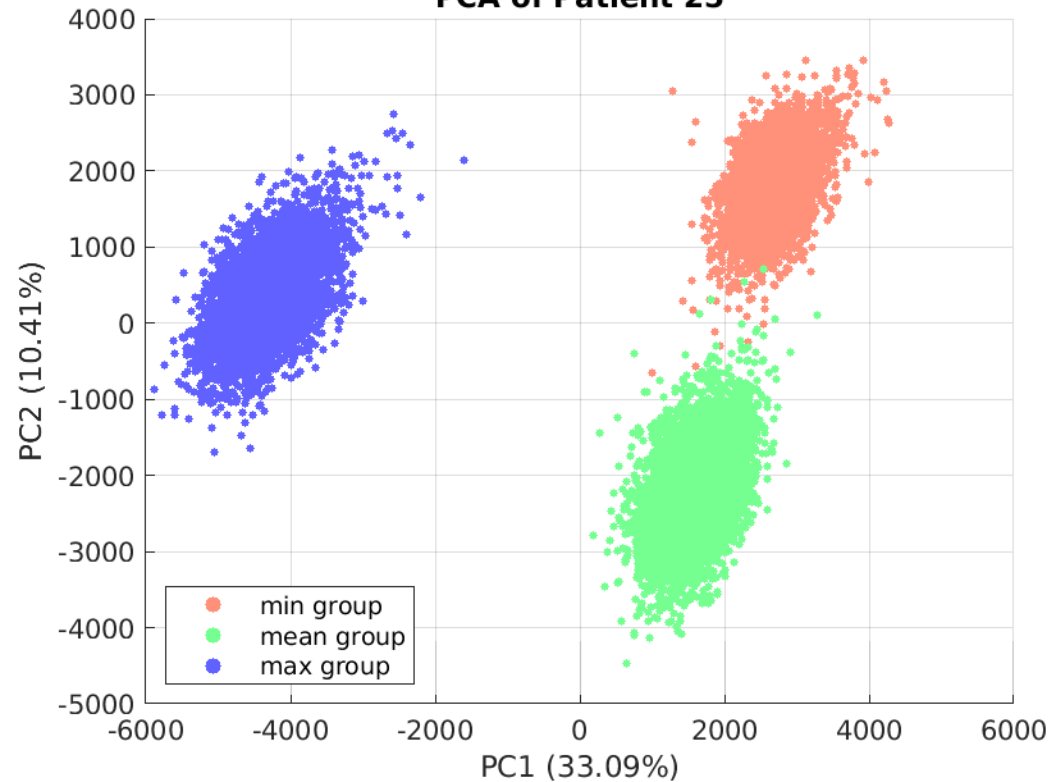

**PCA of Patient 26**

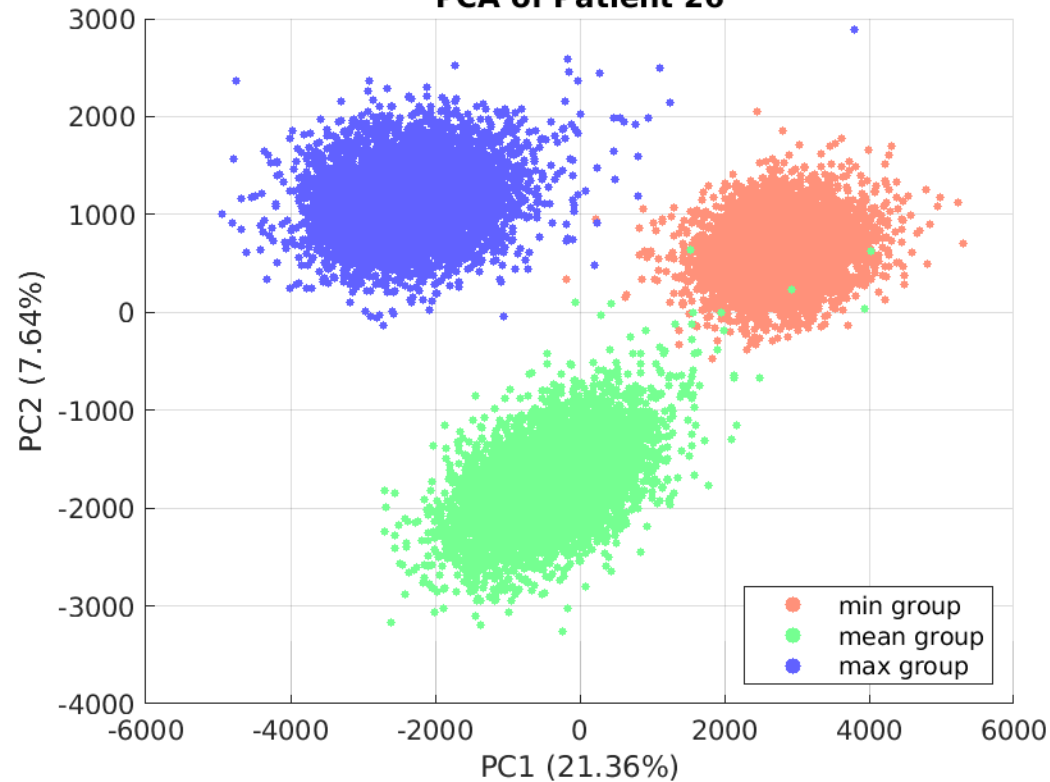

**PCA of Patient 27**

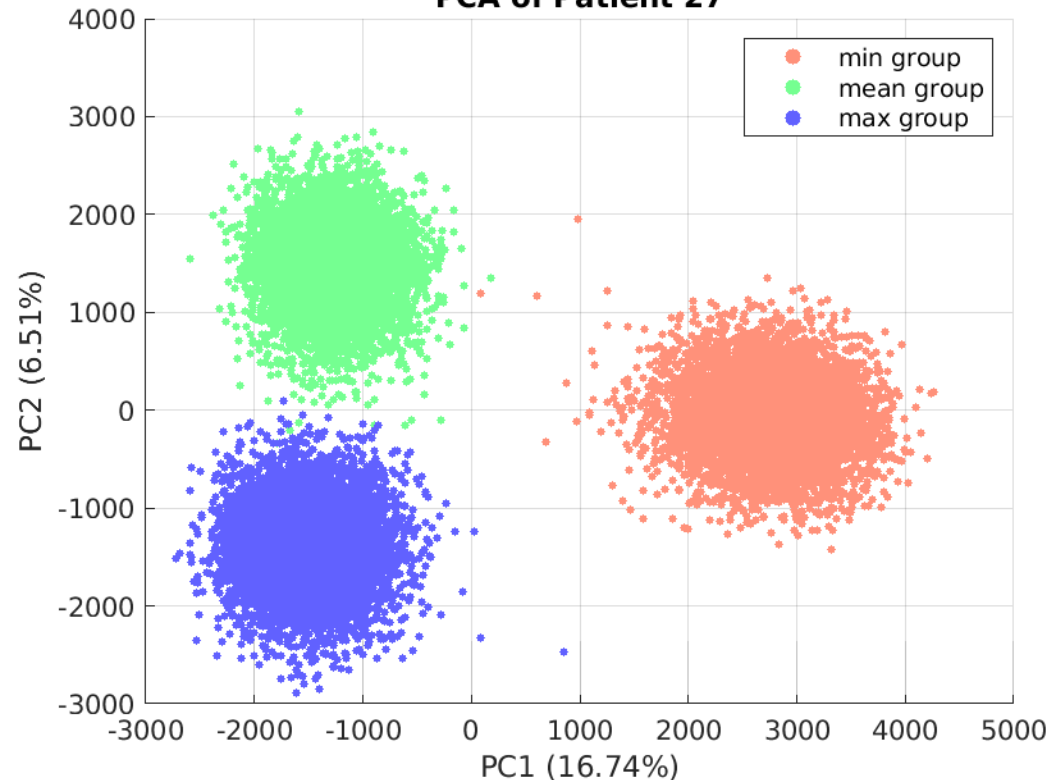

**PCA of Patient 28**

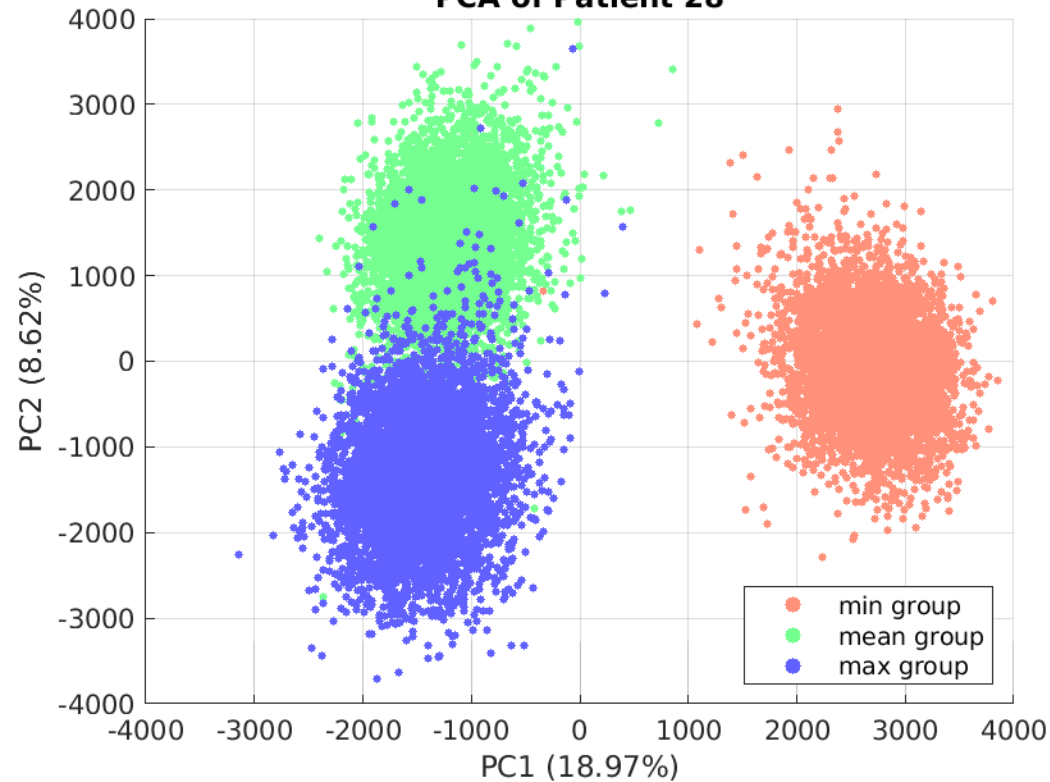

**PCA of Patient 29**

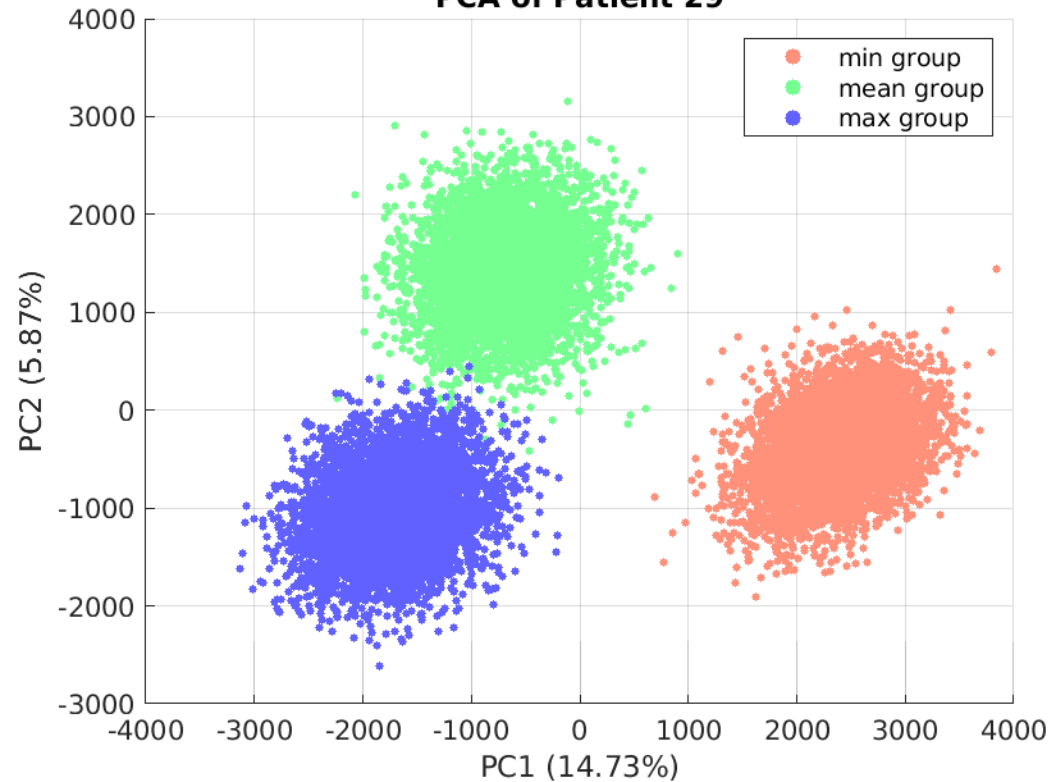

**PCA of Patient 30**

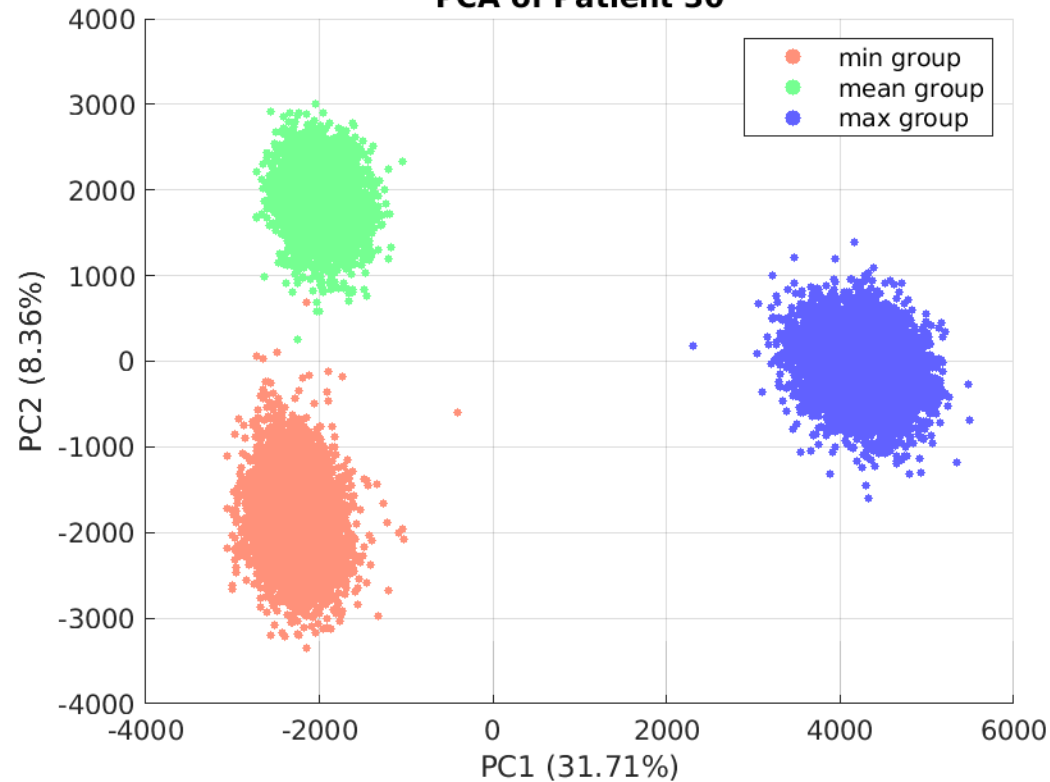

**PCA of Patient 31**

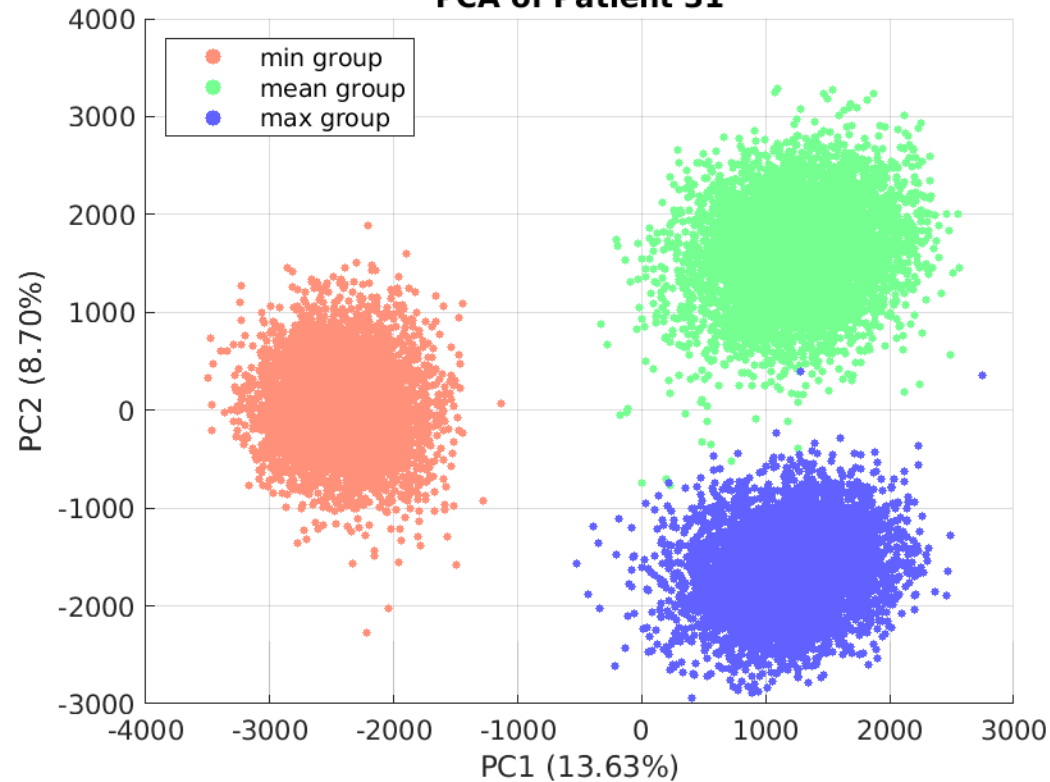

**PCA of Patient 32**

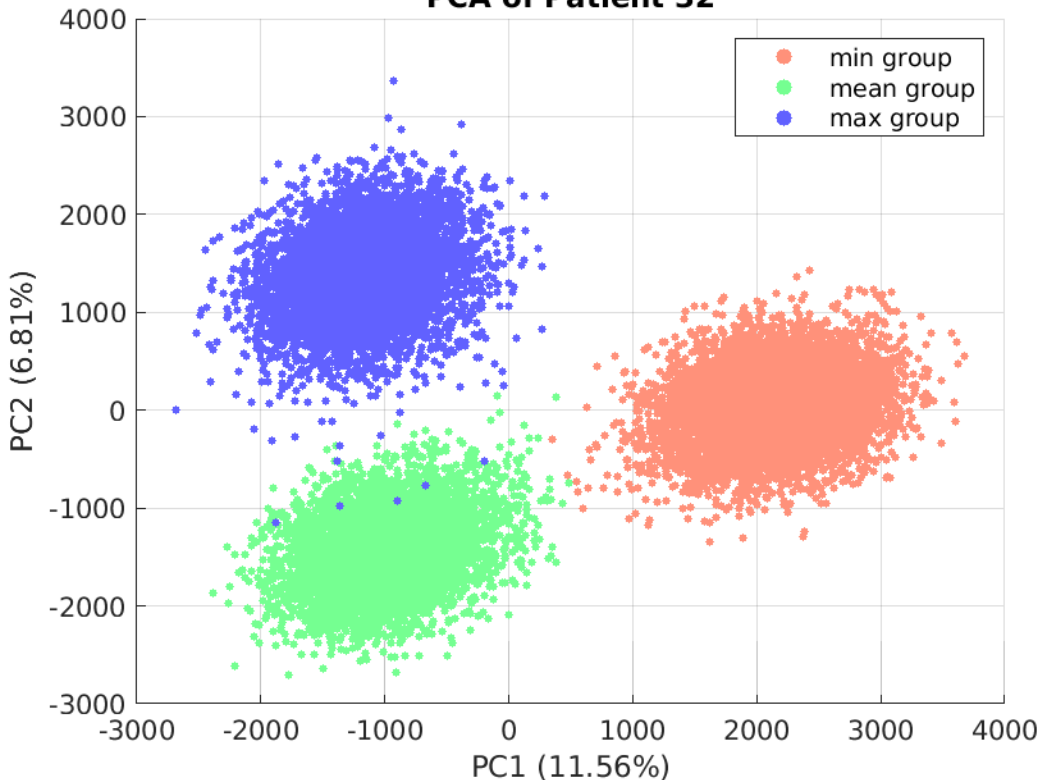



**PCA of Patient 33**

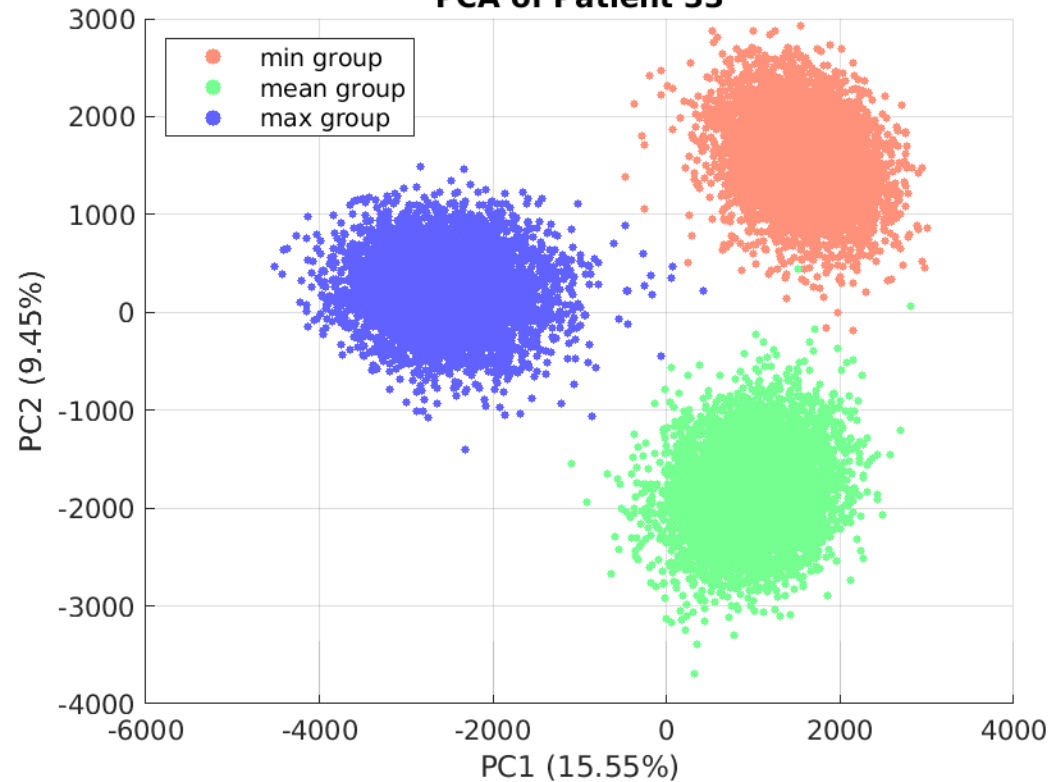

**PCA of Patient 34**

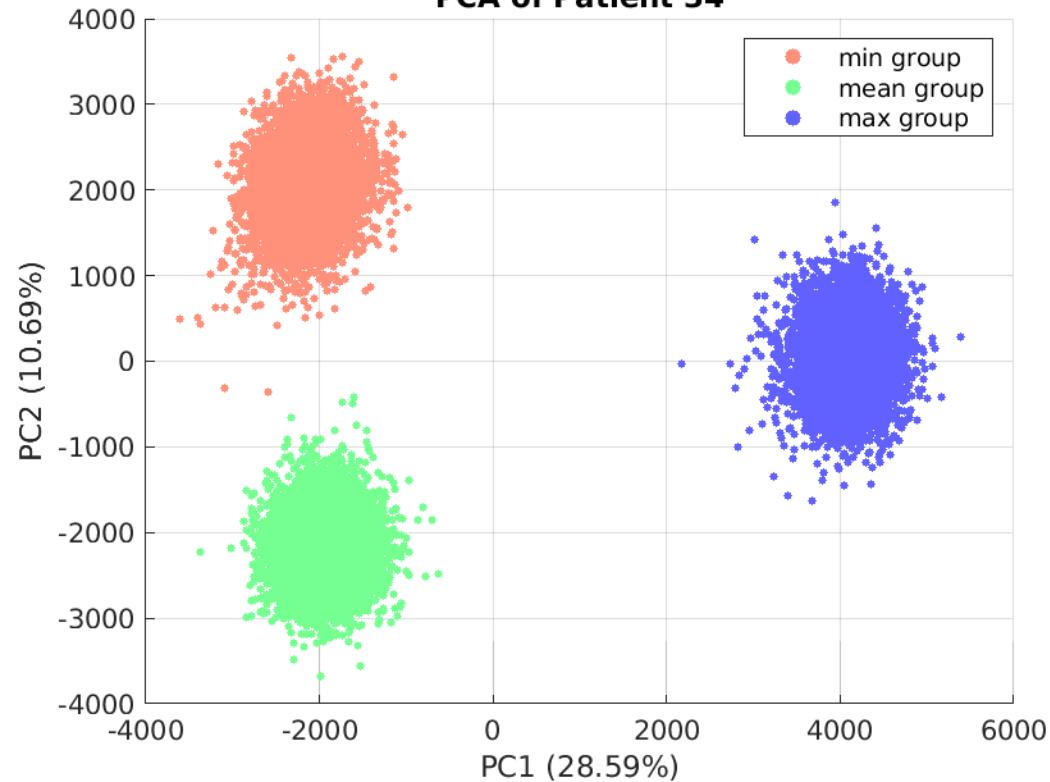

**PCA of Patient 35**

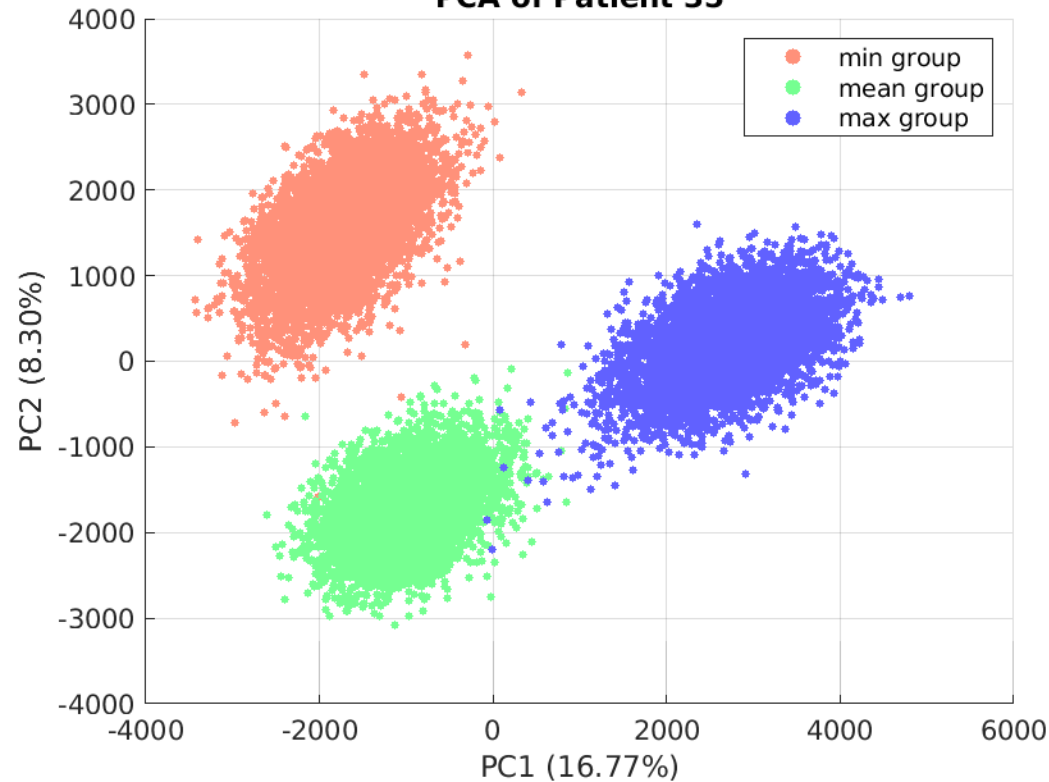

**PCA of Patient 36**

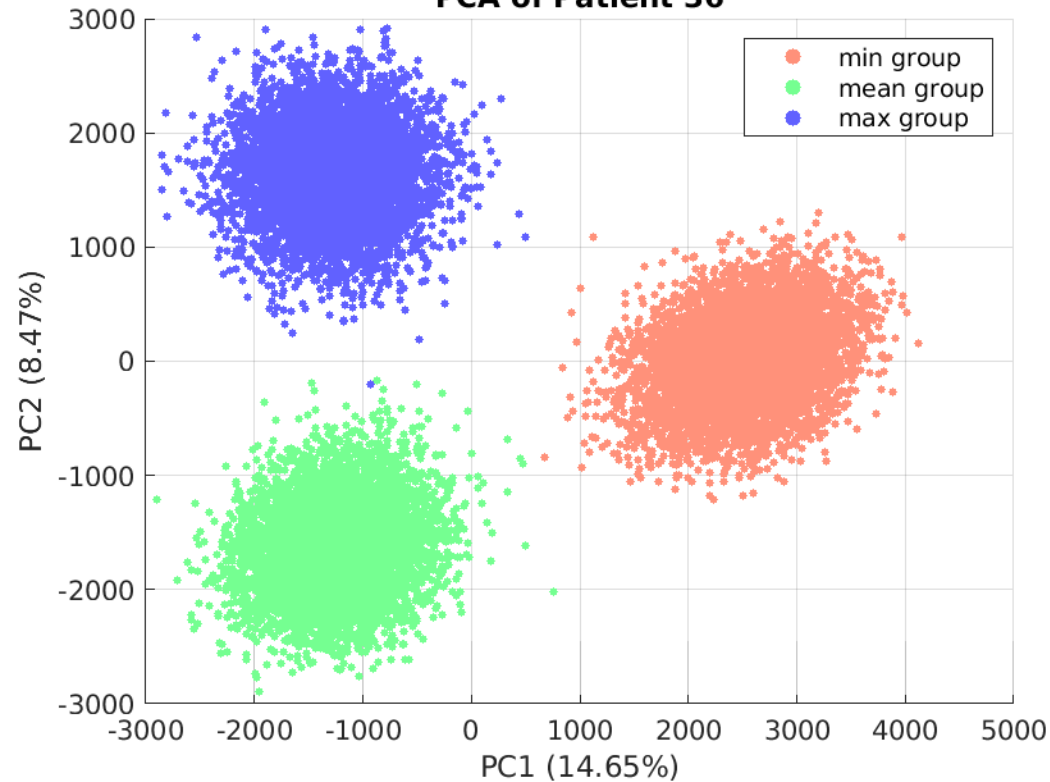

**PCA of Patient 37**

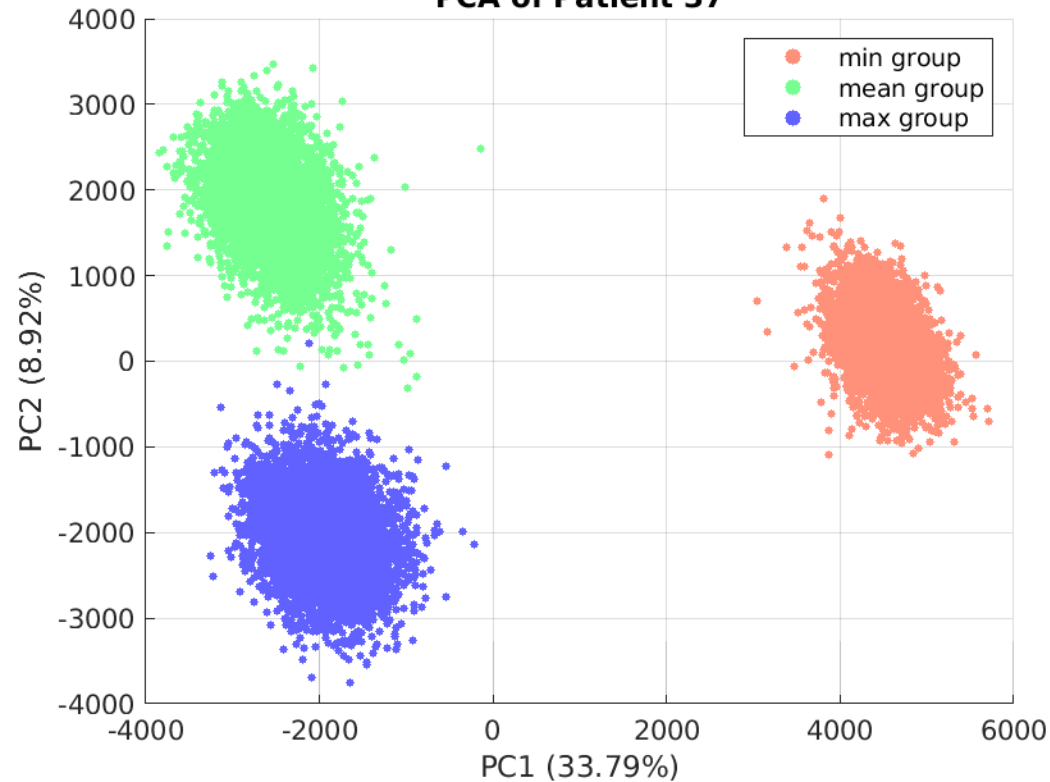

**PCA of Patient 38**

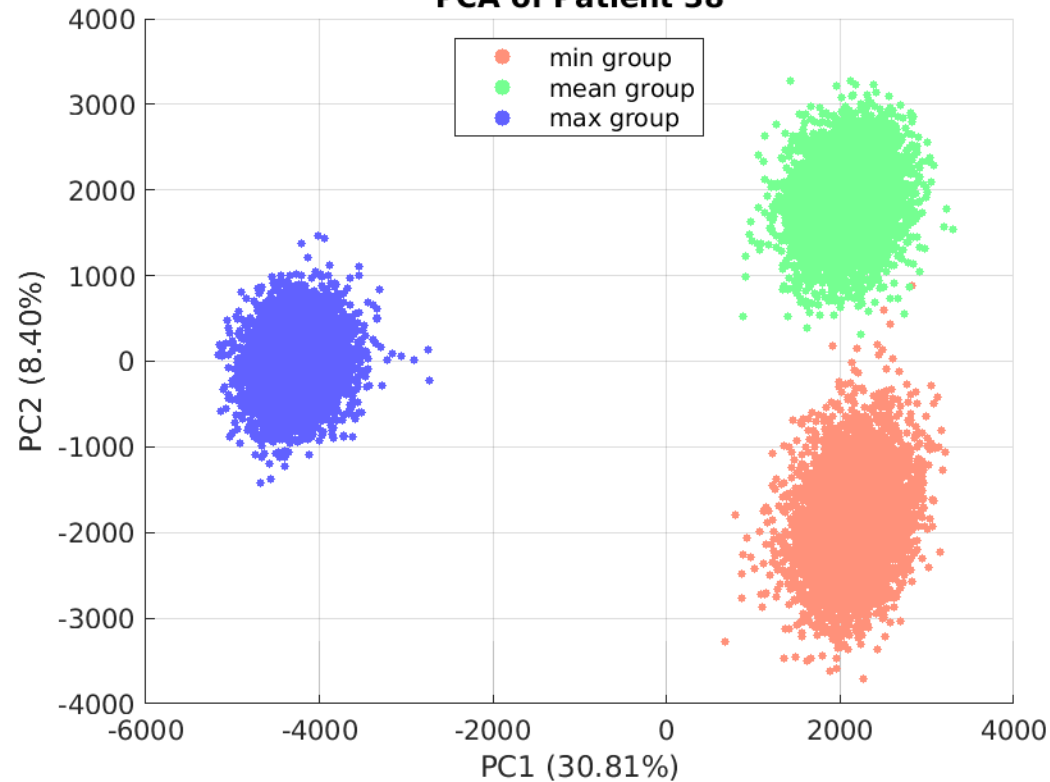

**PCA of Patient 39**

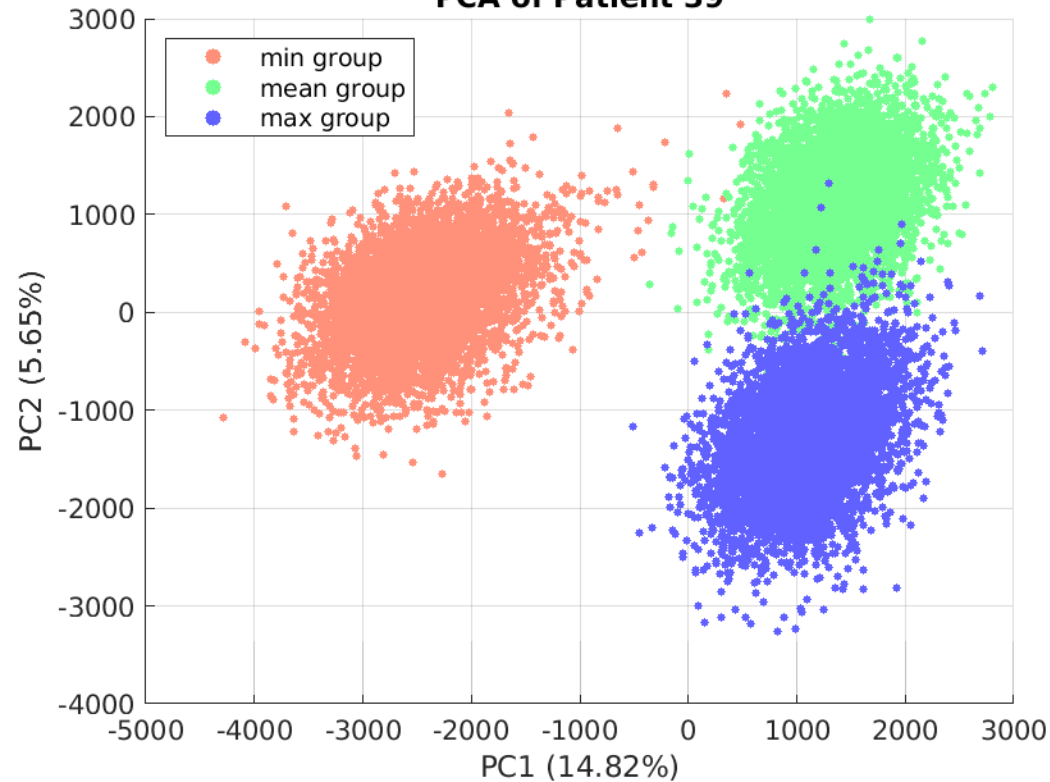

**PCA of Patient 40**

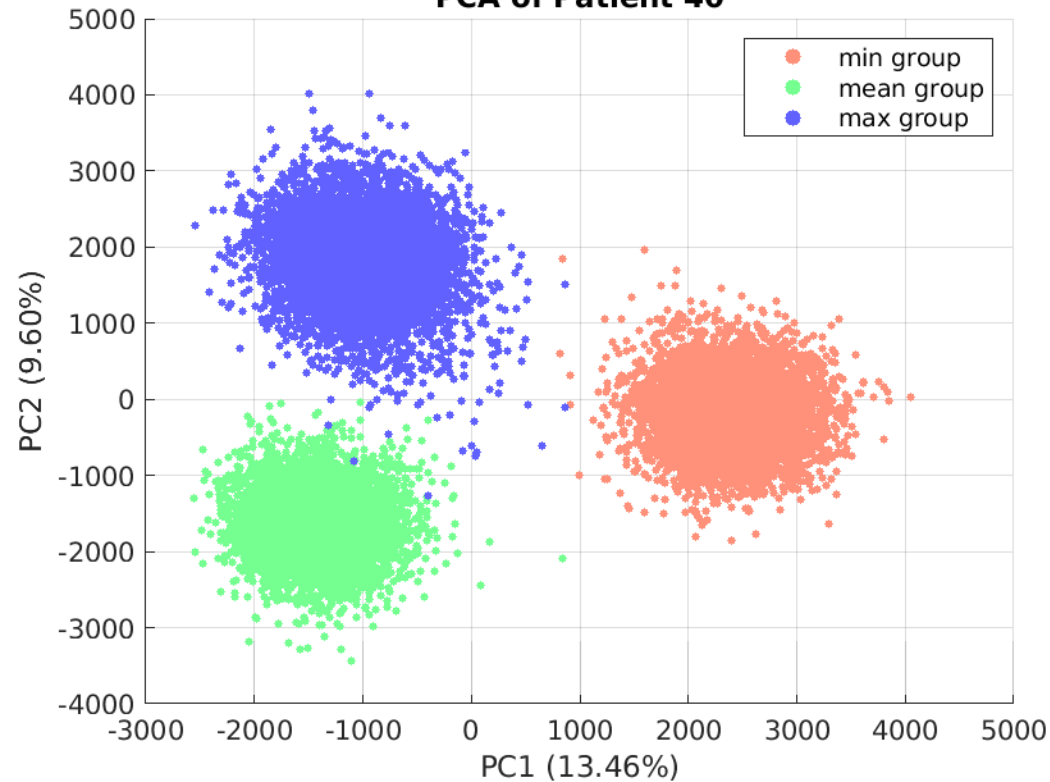



**PCA of Patient 41**

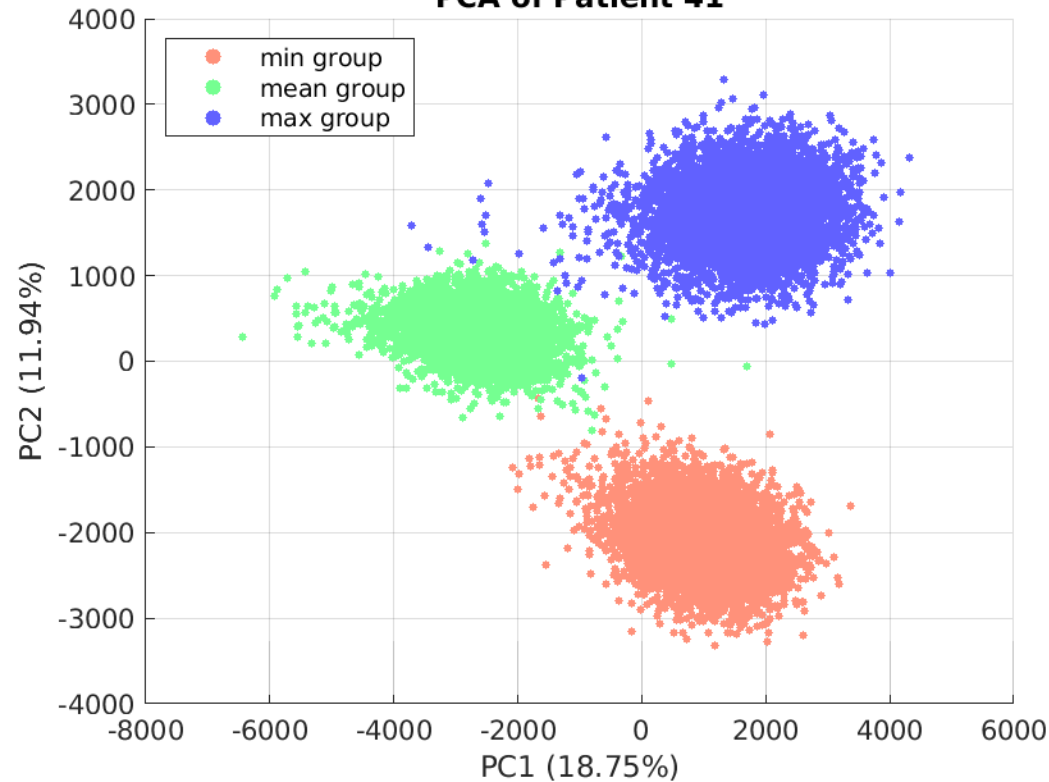

**PCA of Patient 42**

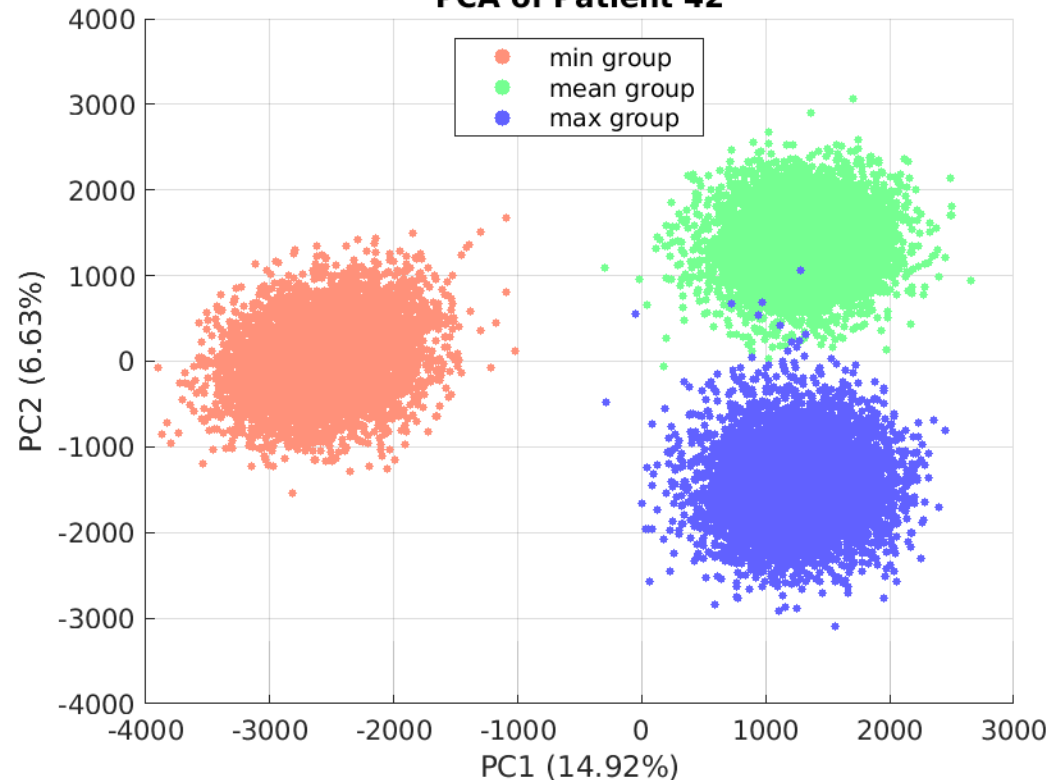

**PCA of Patient 43**

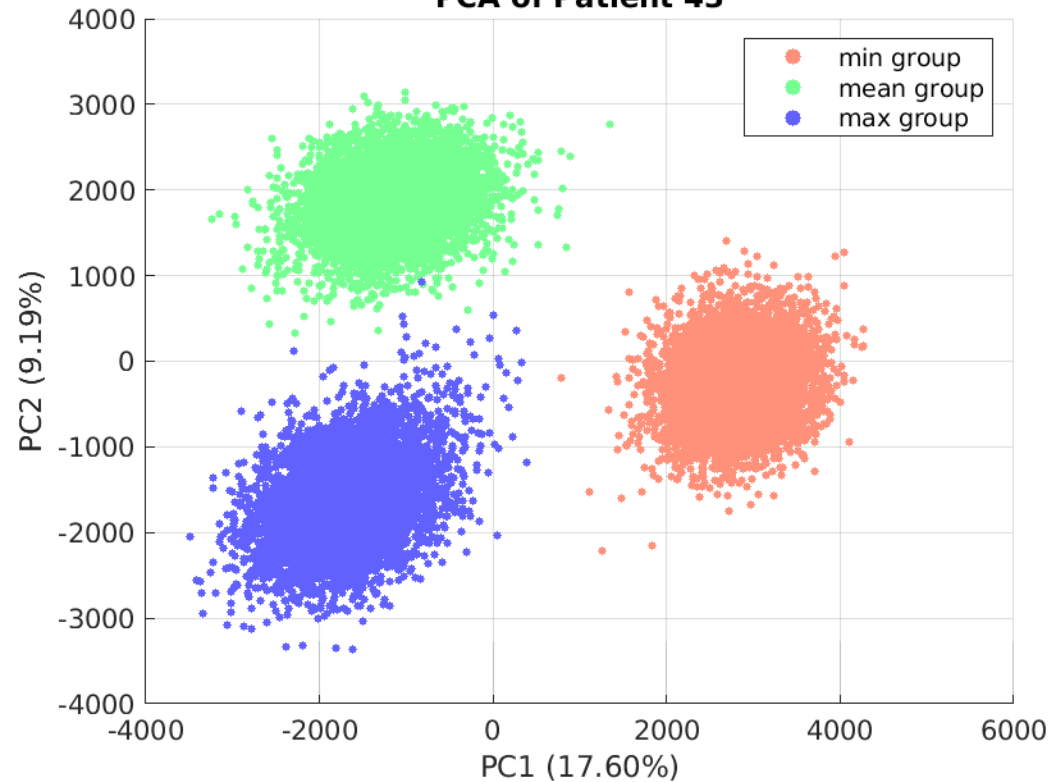

**PCA of Patient 44**

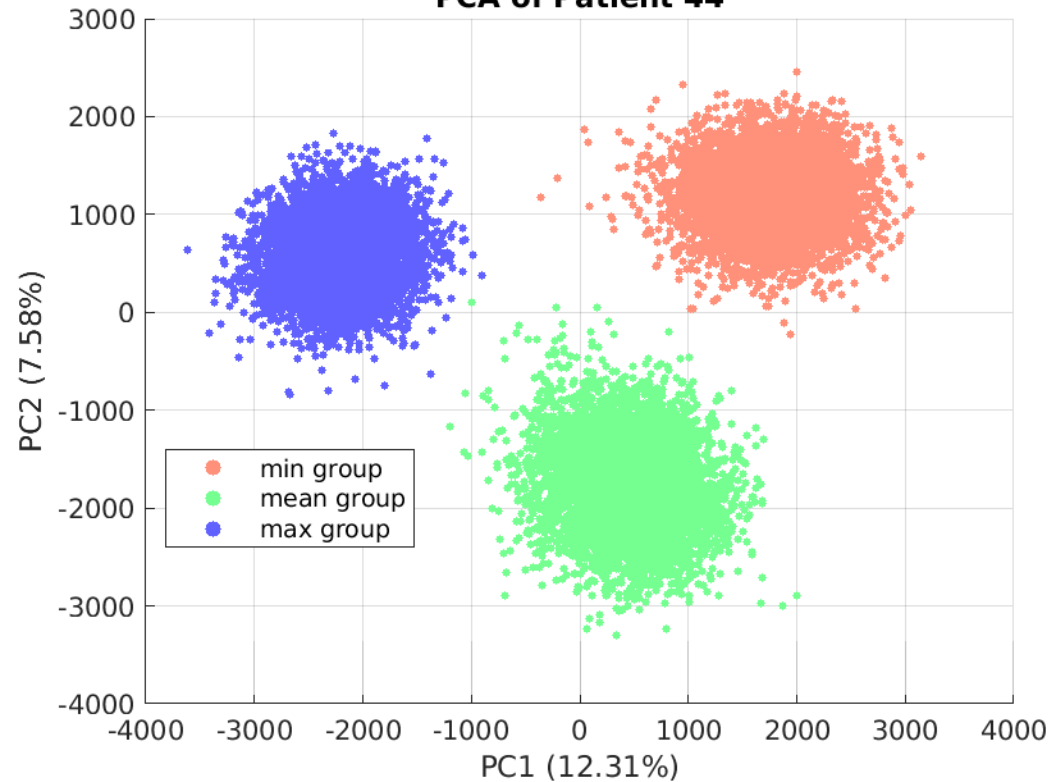

**PCA of Patient 45**

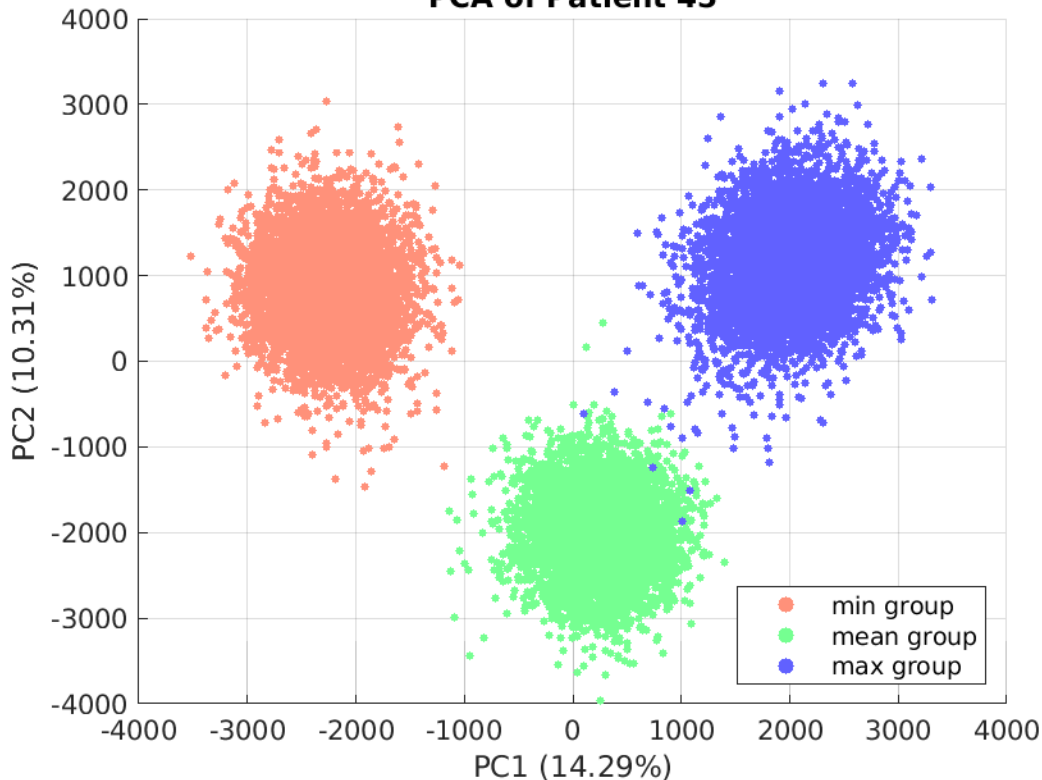

**PCA of Patient 46**

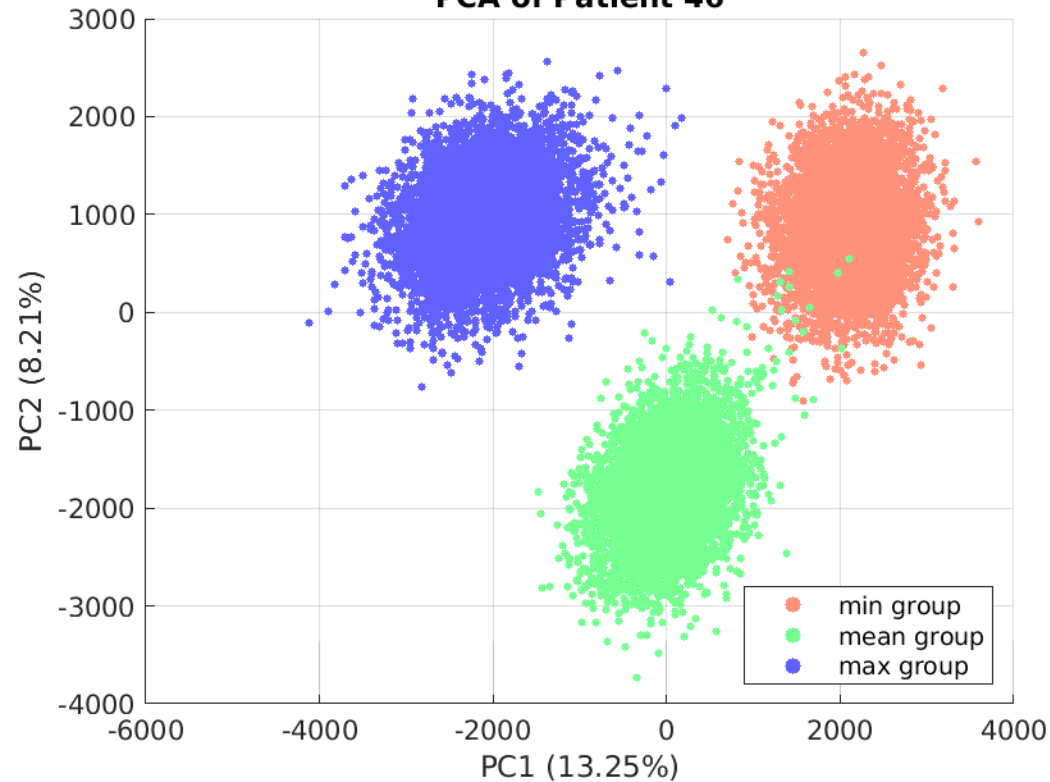

**PCA of Patient 47**

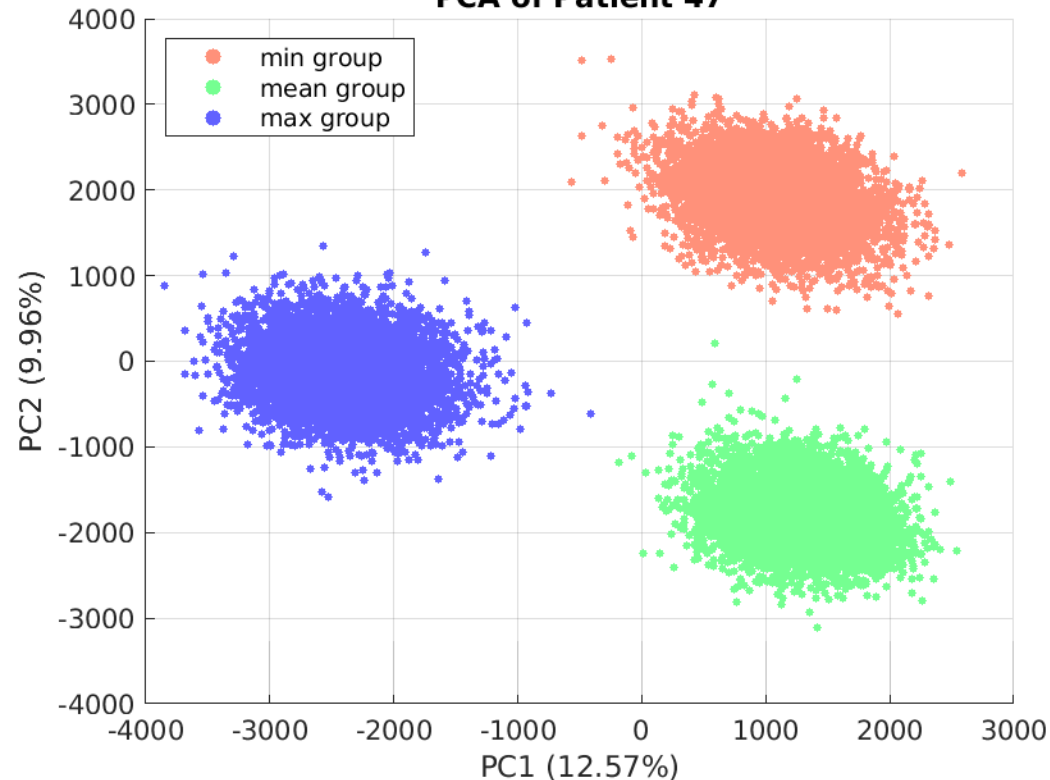

**PCA of Patient 48**

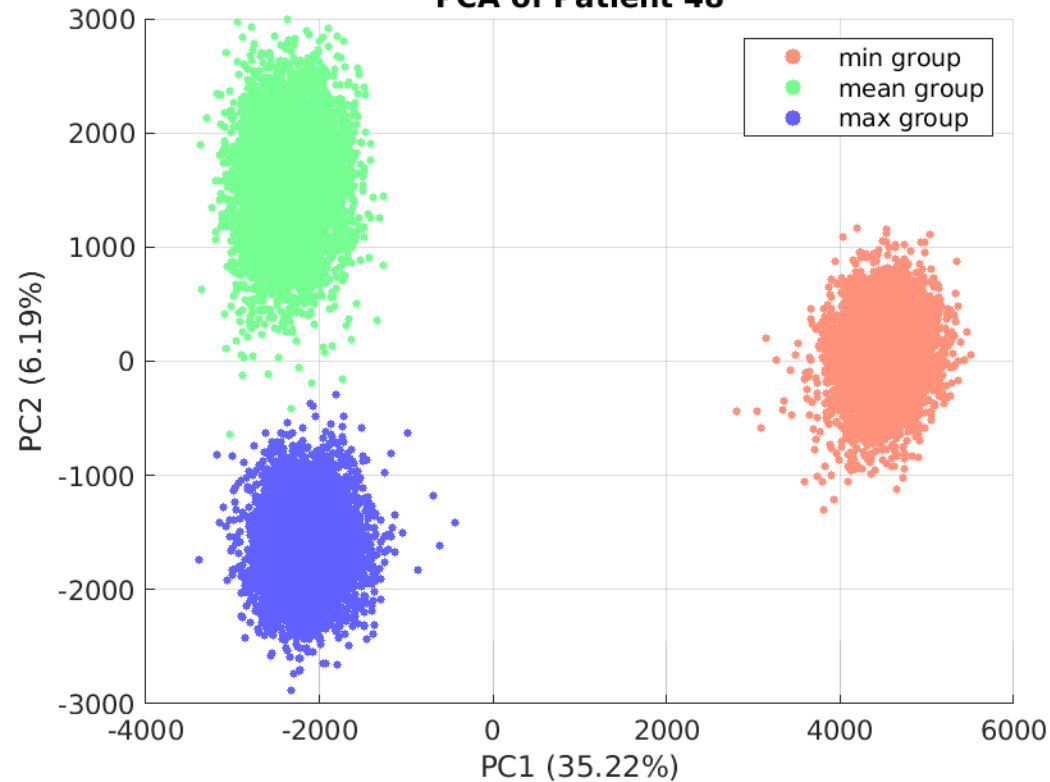



**PCA of Patient 49**

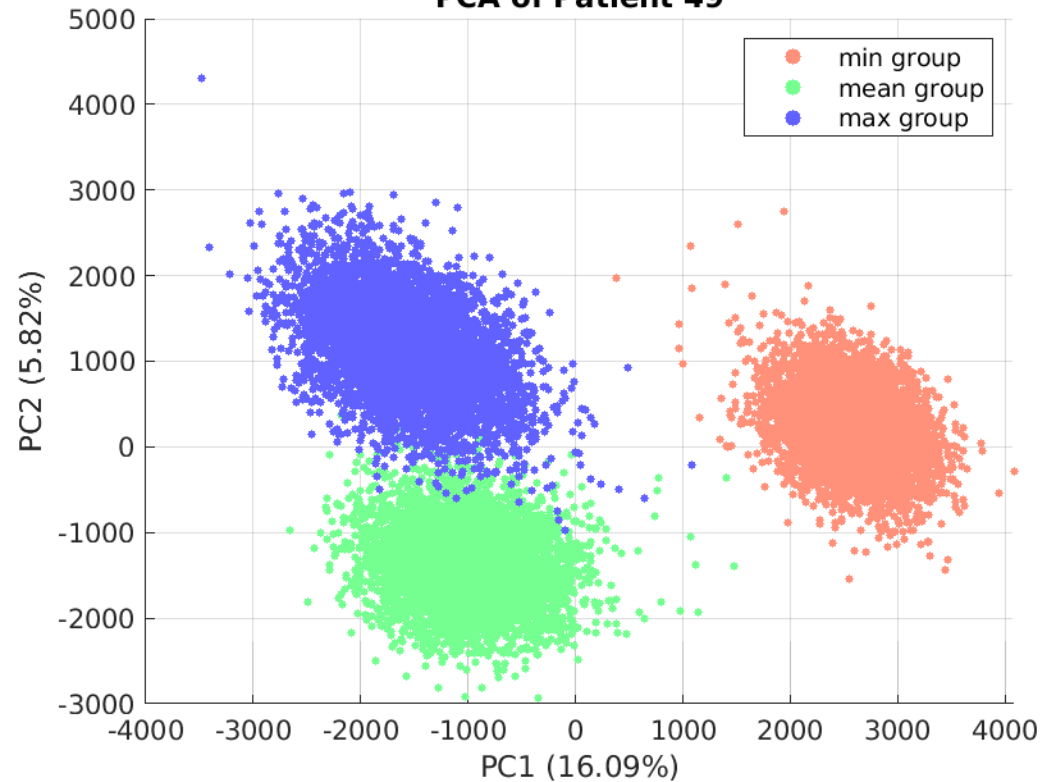

**PCA of Patient 50**

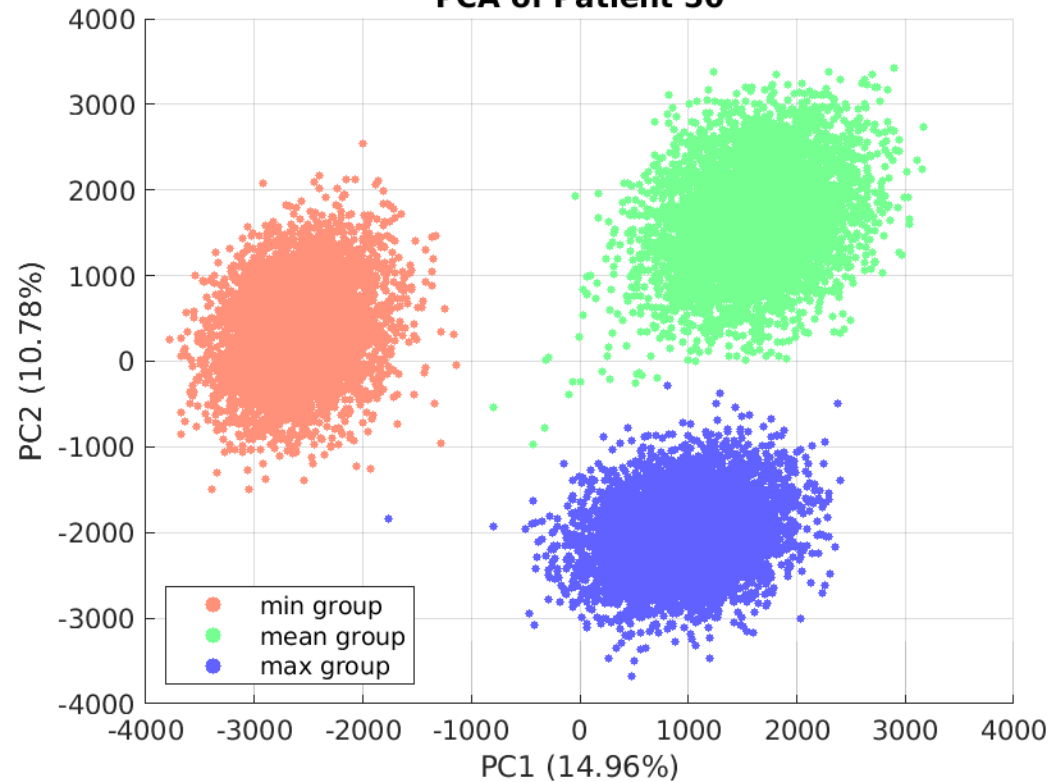

**PCA of Patient 51**

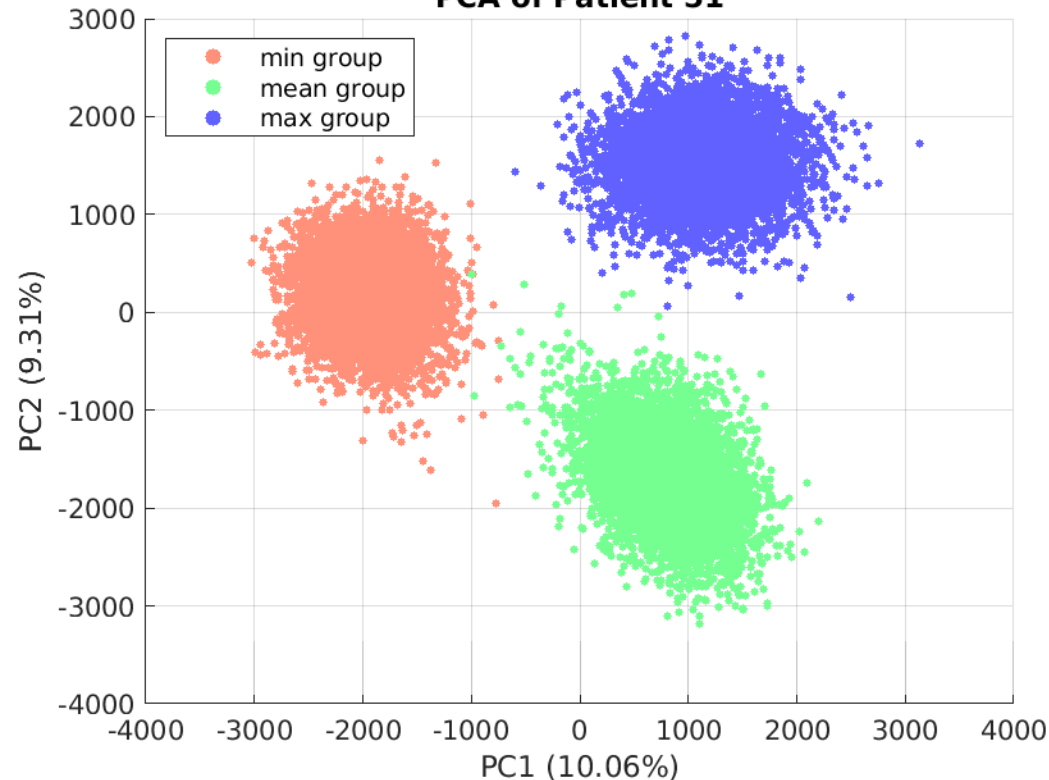

**PCA of Patient 52**

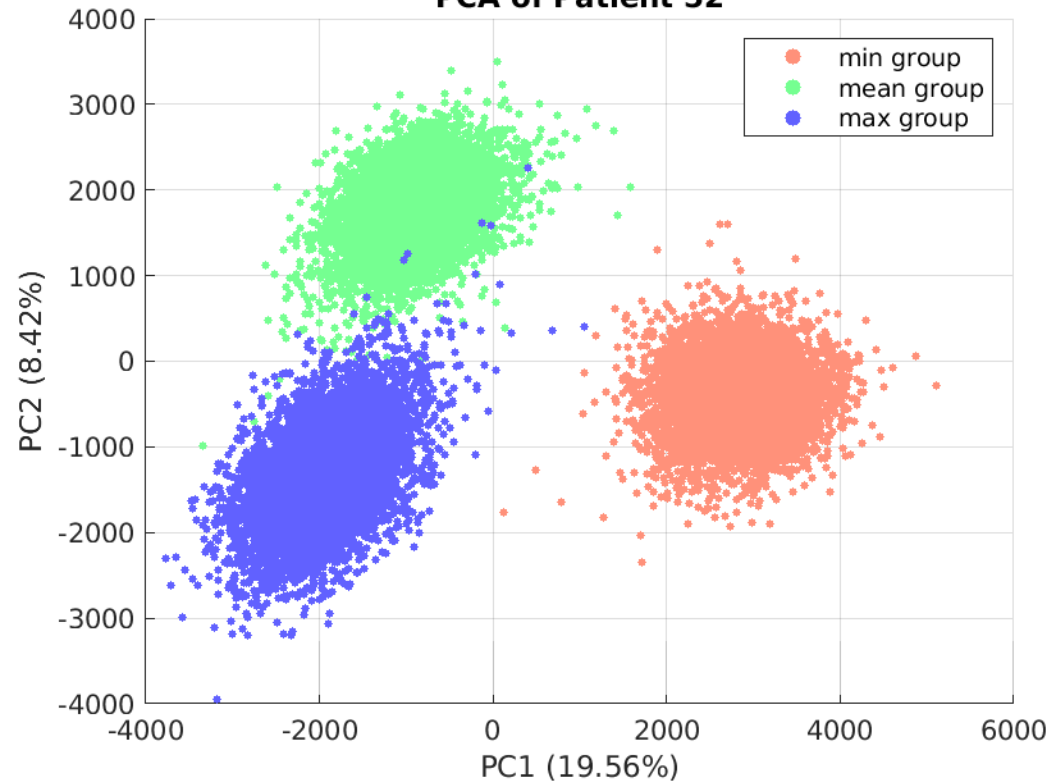

**PCA of Patient 53**

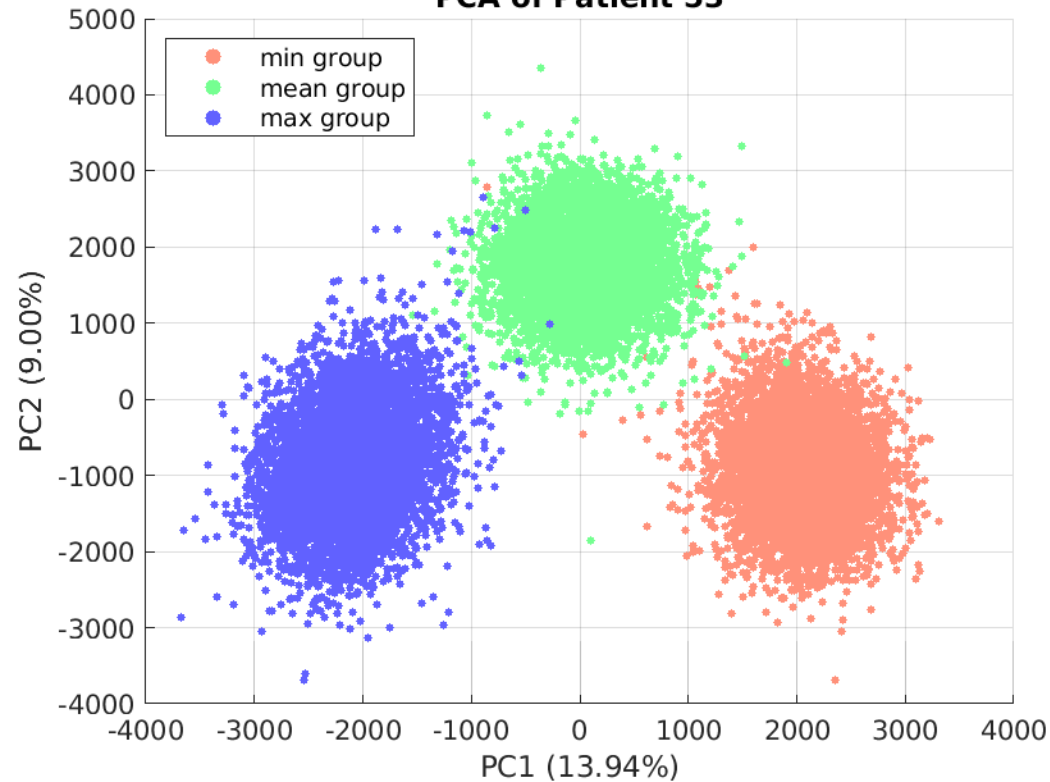

**PCA of Patient 54**

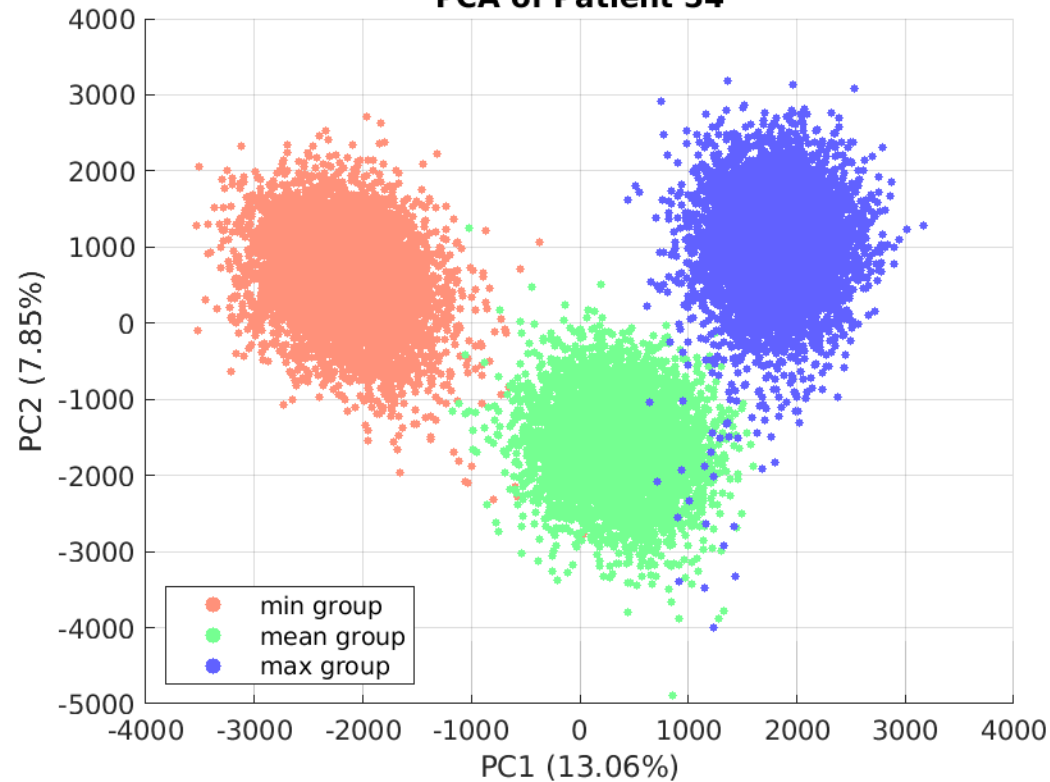

**PCA of Patient 55**

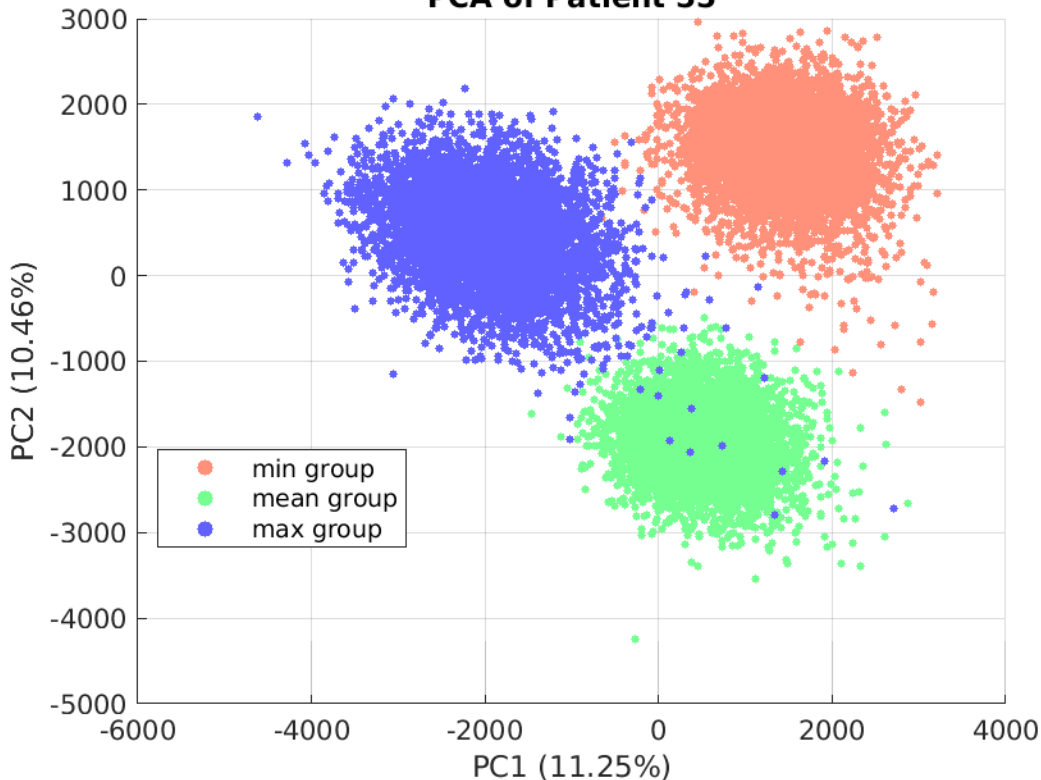

**PCA of Patient 56**

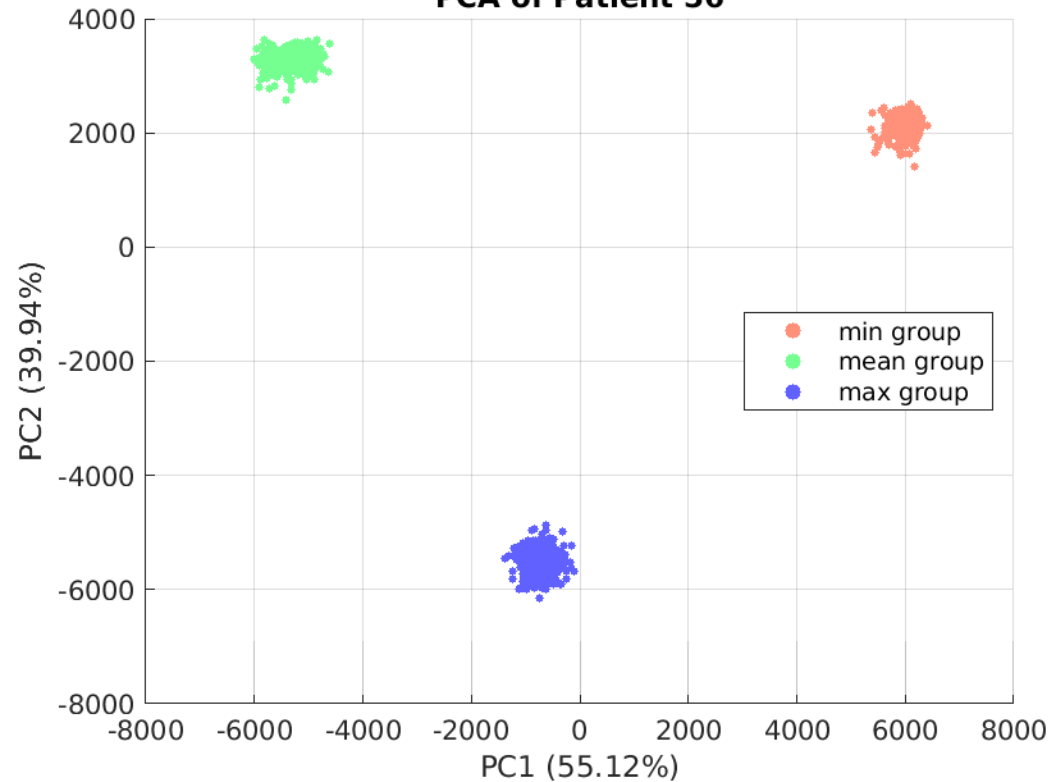



**PCA of Patient 57**

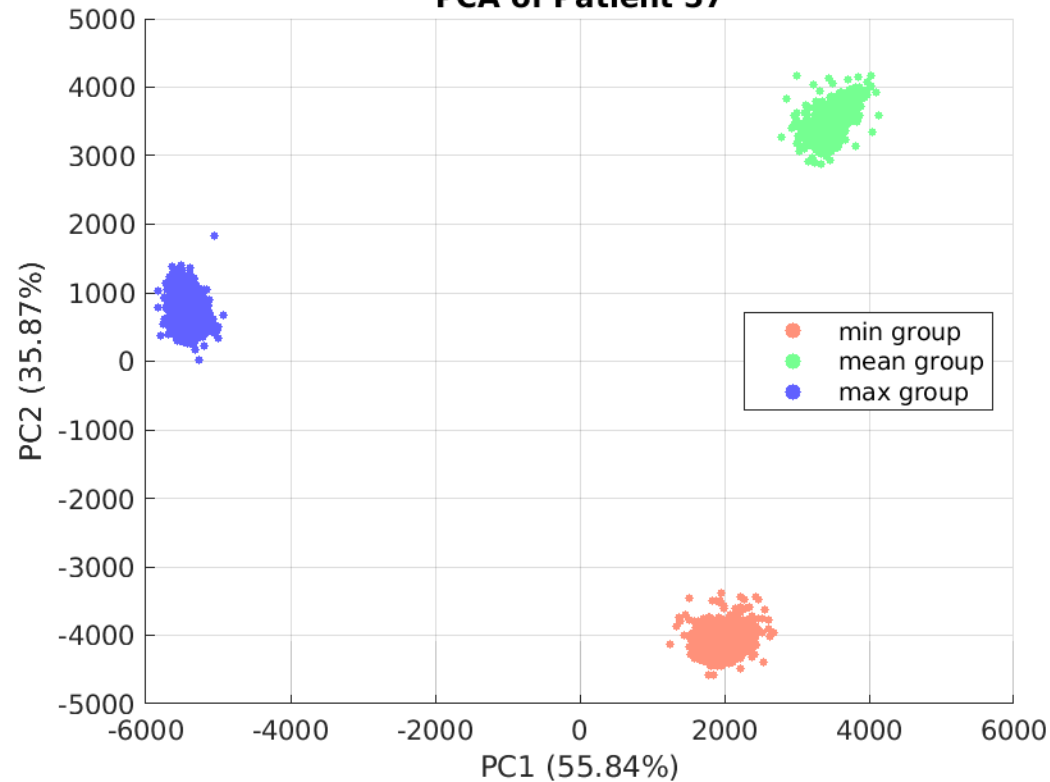

**PCA of Patient 58**

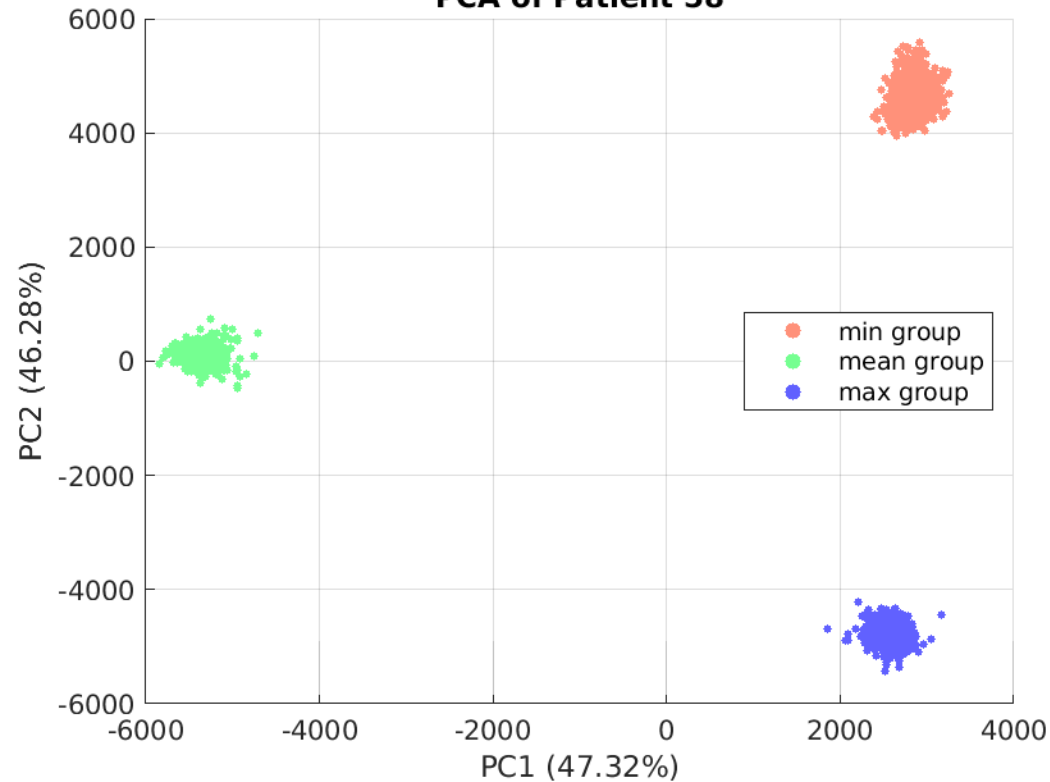

**PCA of Patient 59**

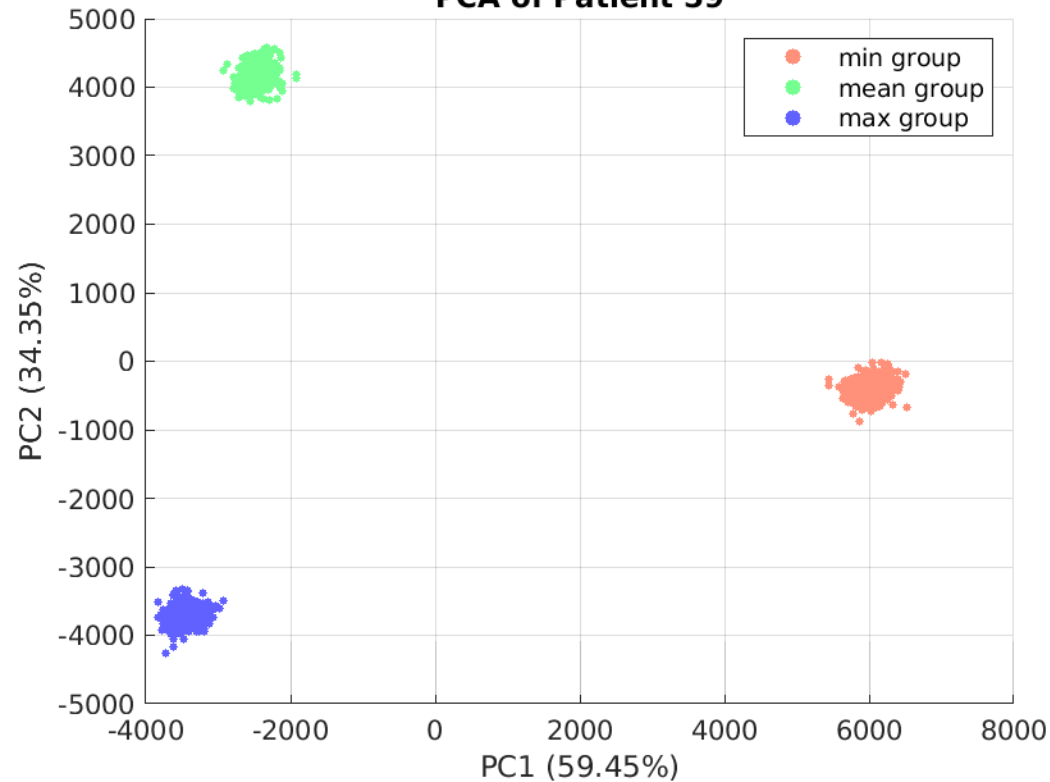

**PCA of Patient 60**

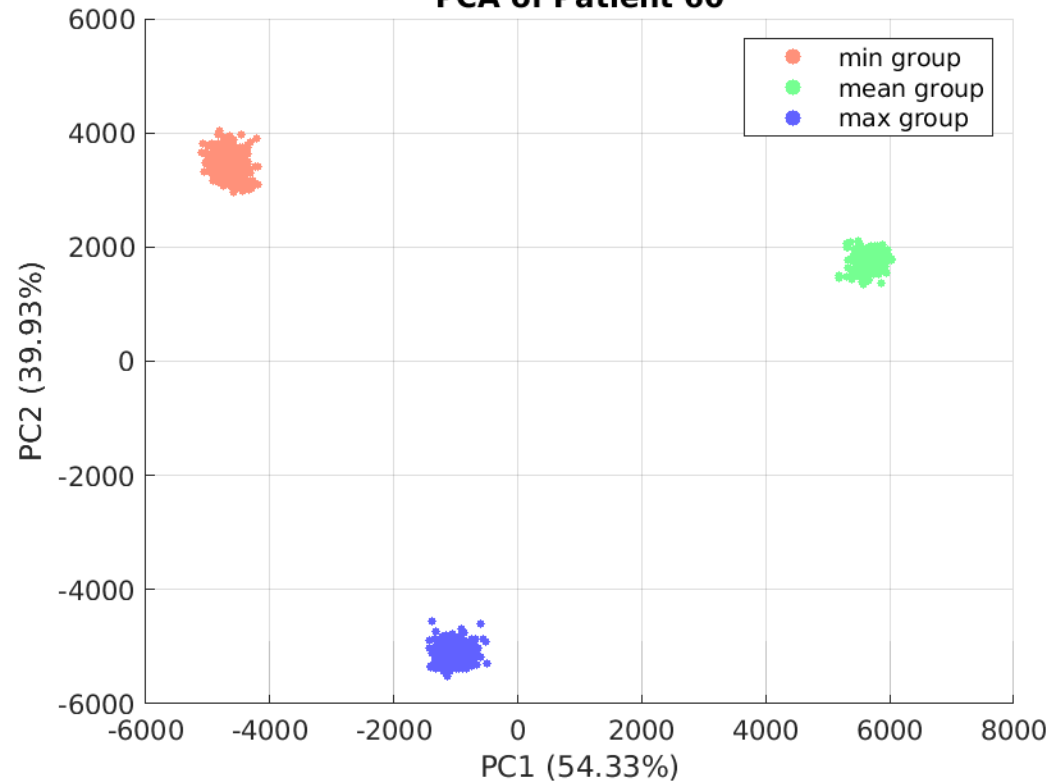

**PCA of Patient 61**

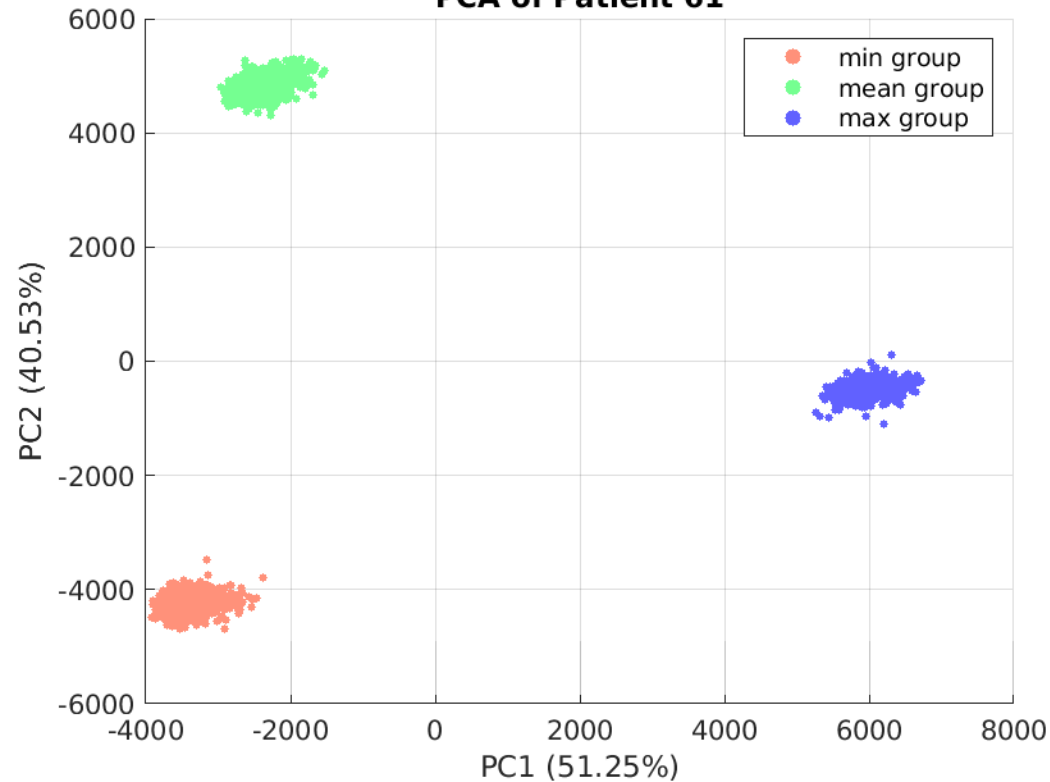

**PCA of Patient 62**

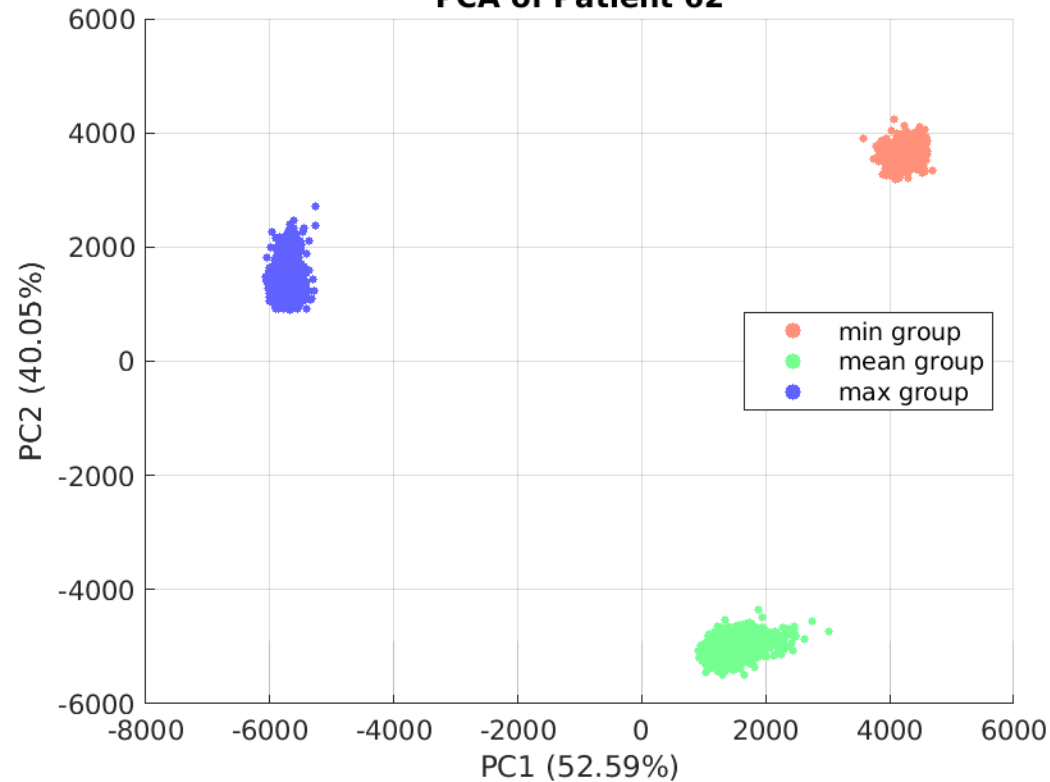

**PCA of Patient 63**

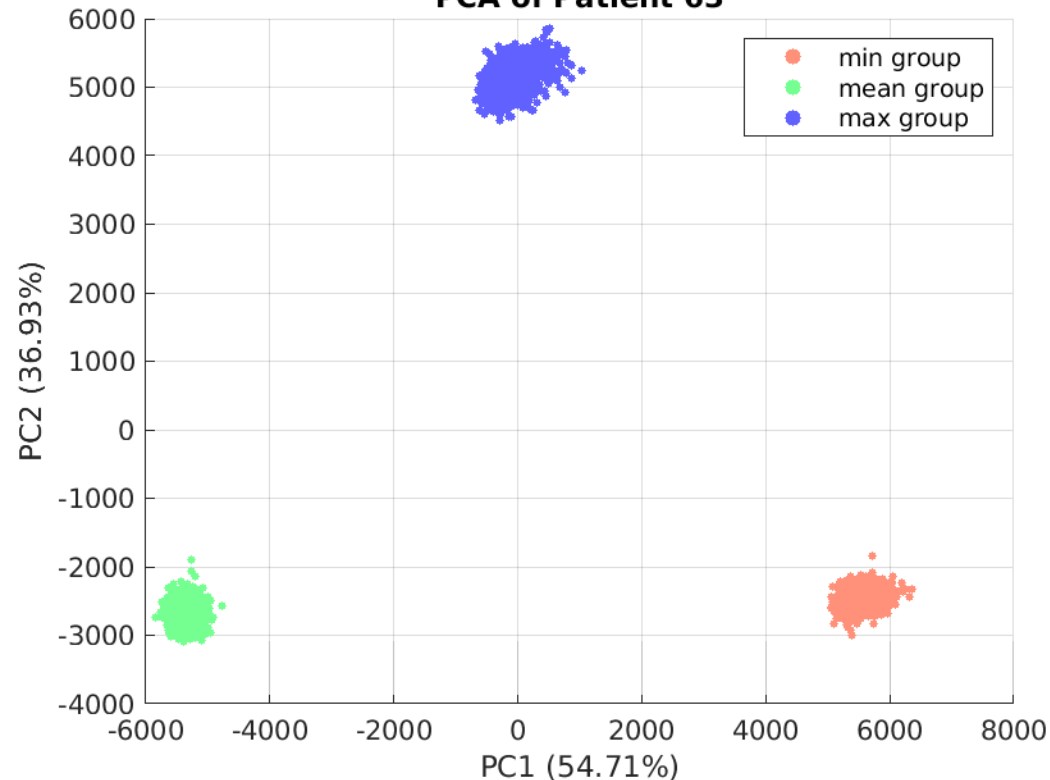

**PCA of Patient 64**

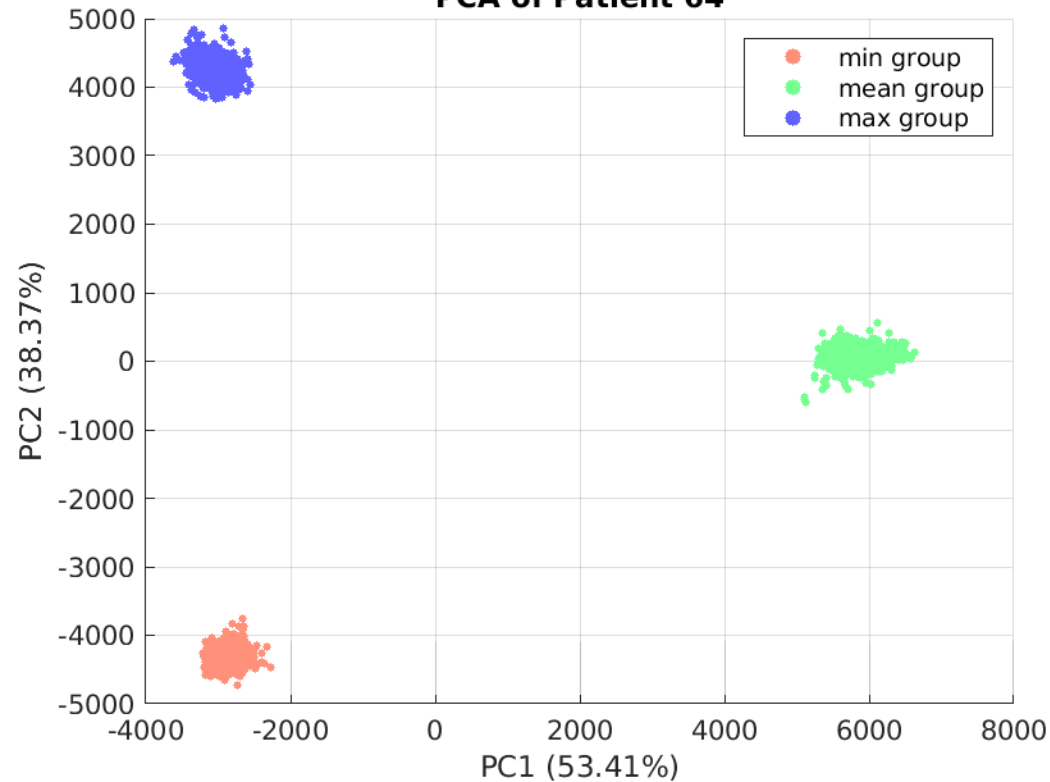



**PCA of Patient 65**

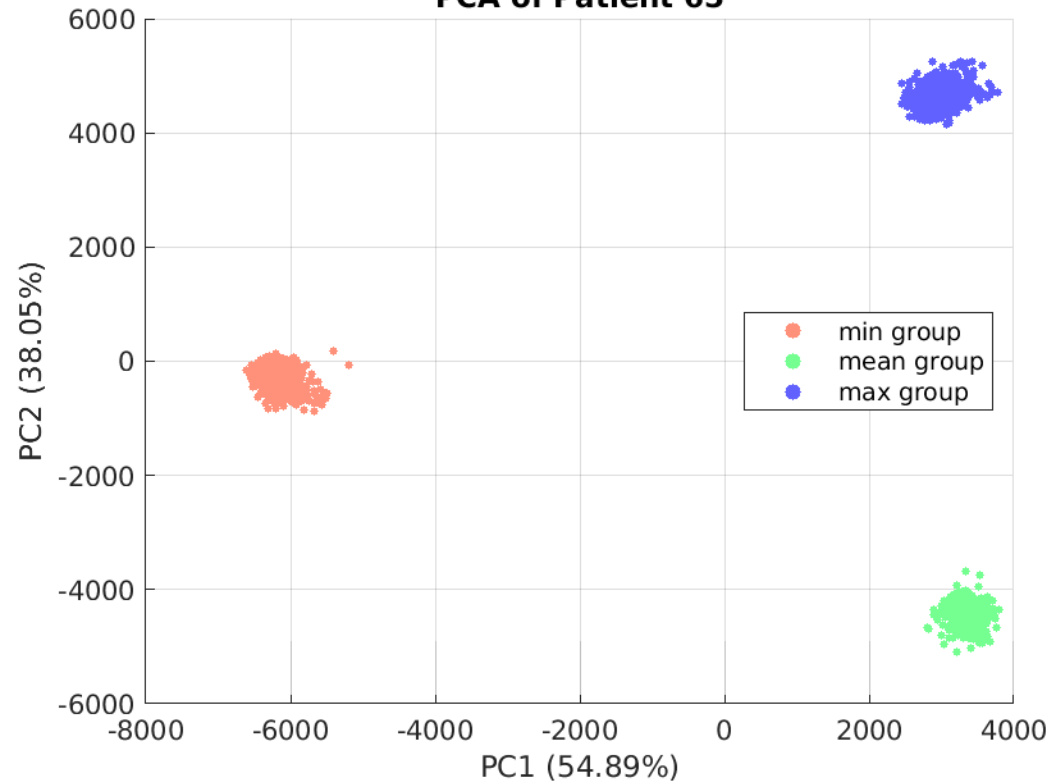

**PCA of Patient 66**

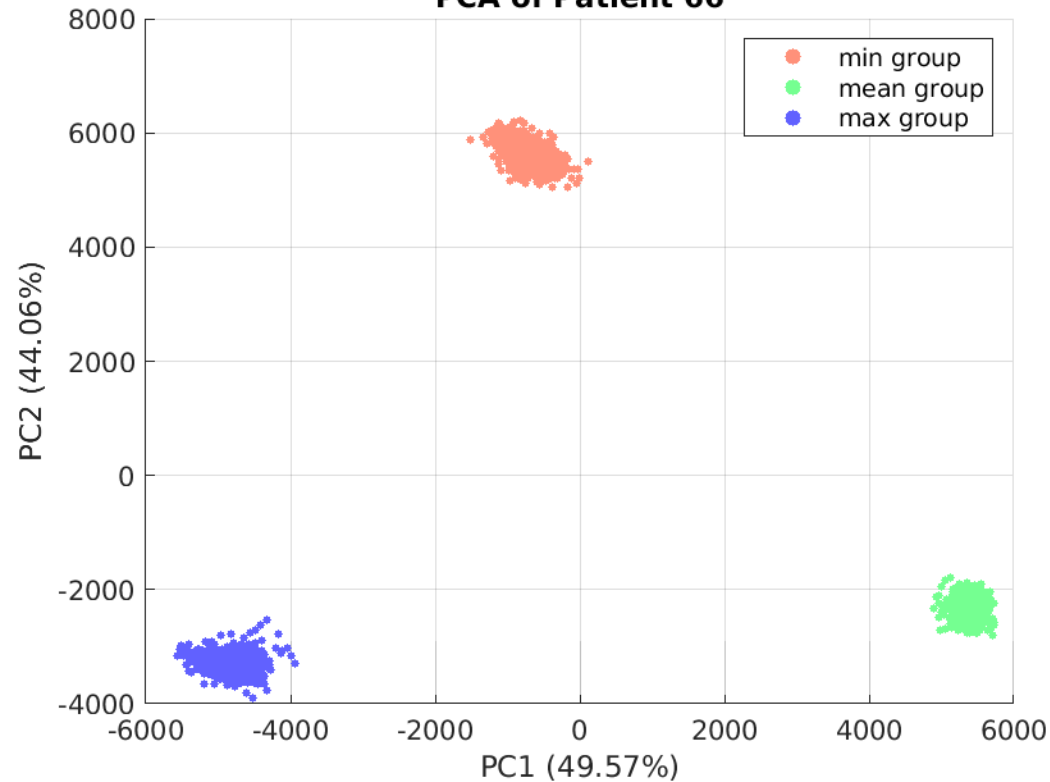

**PCA of Patient 67**

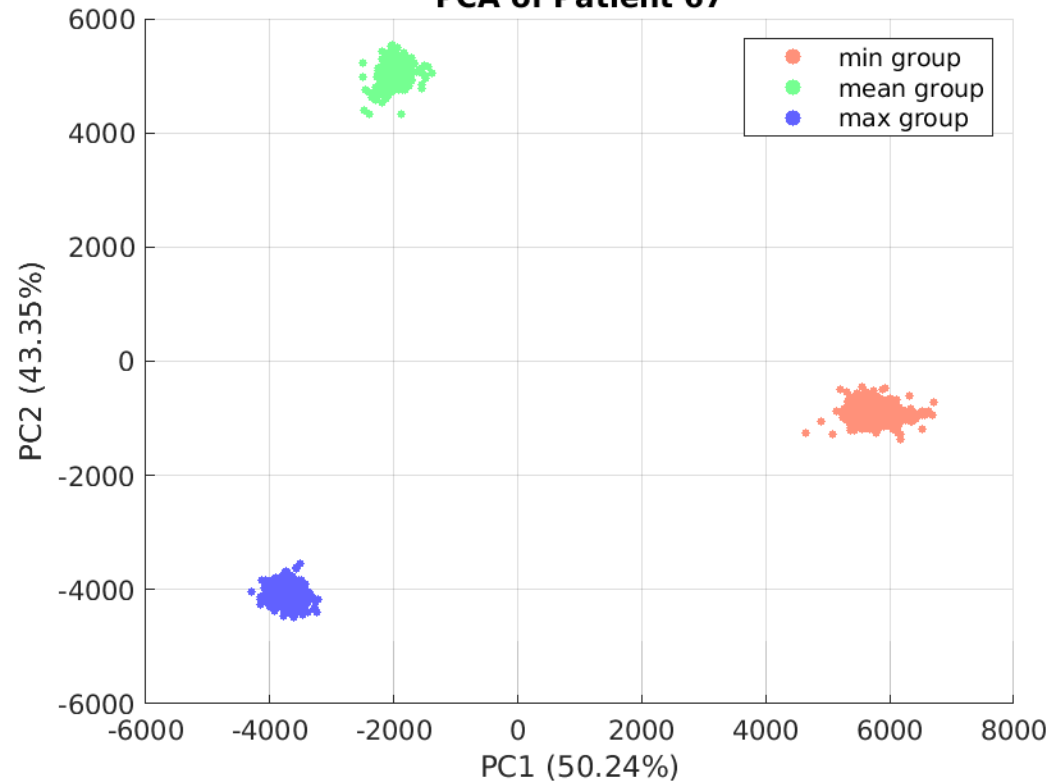

**PCA of Patient 68**

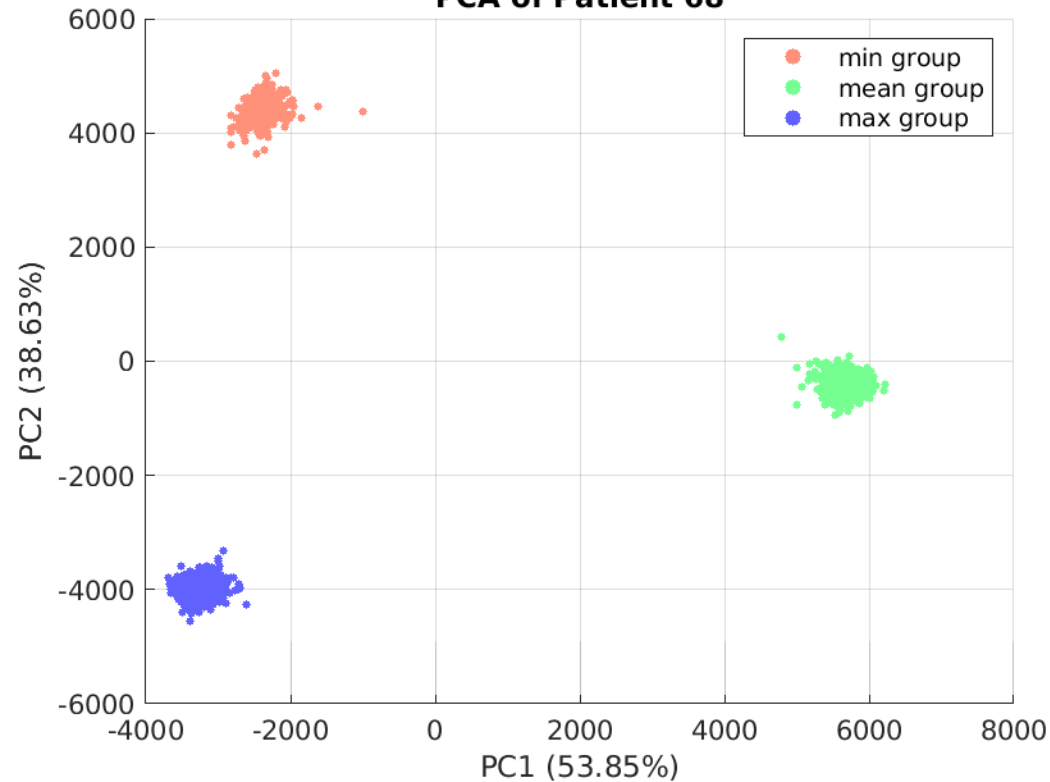

**PCA of Patient 69**

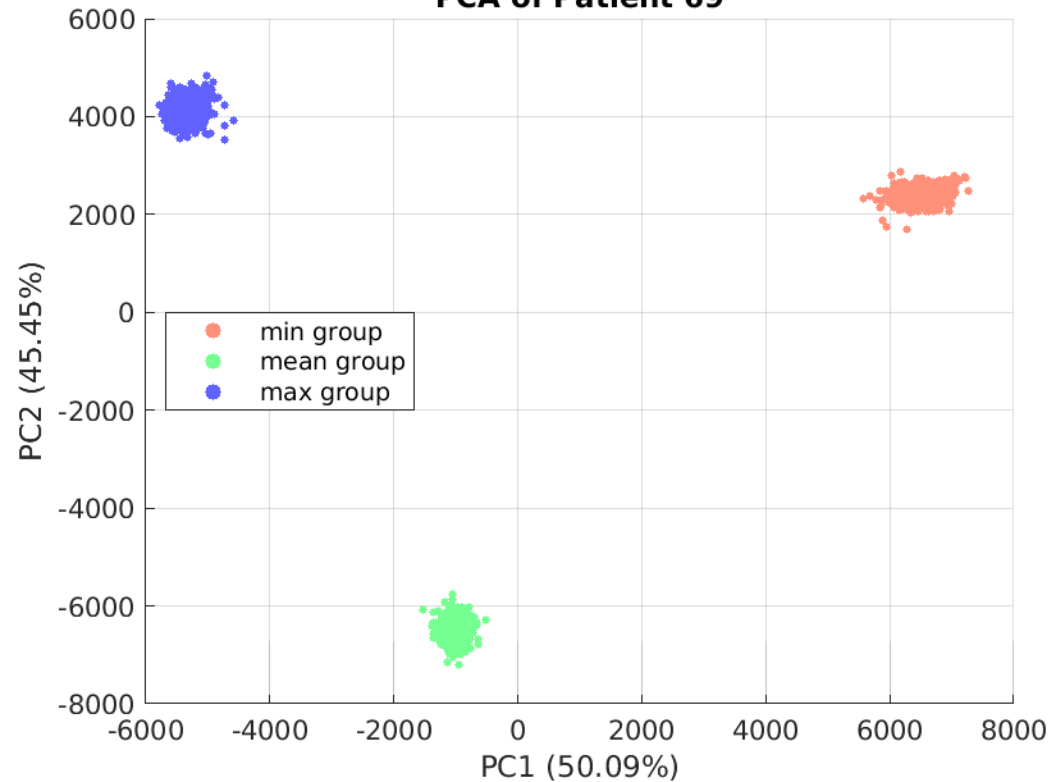

**PCA of Patient 70**

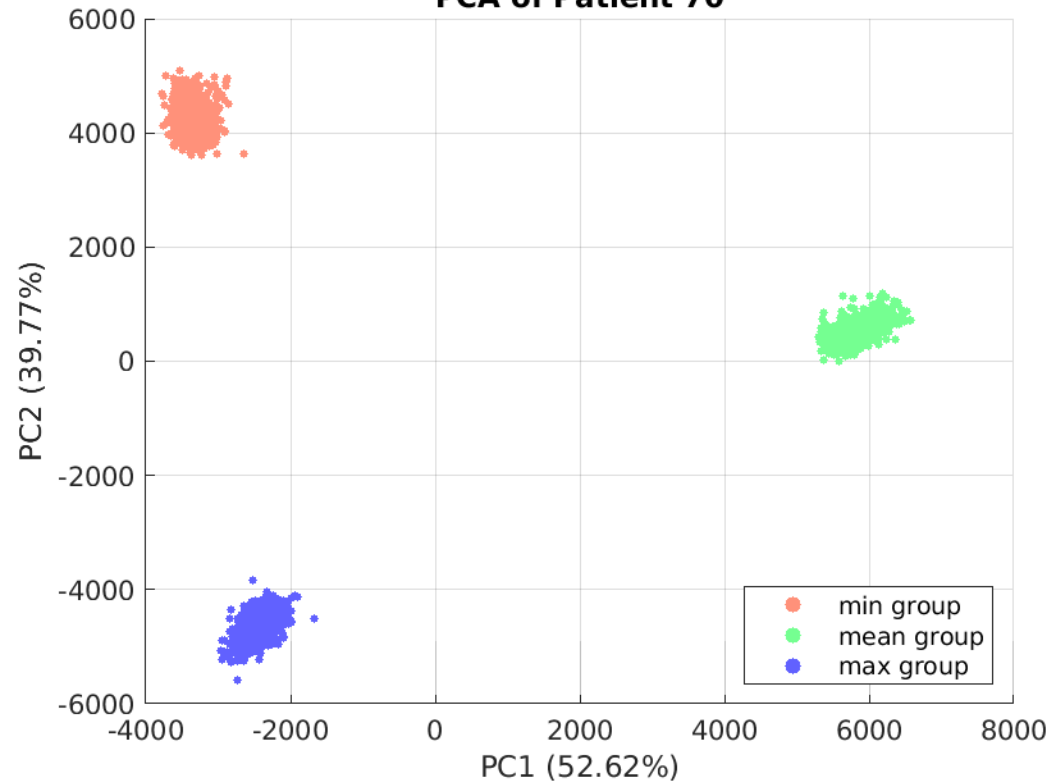

**PCA of Patient 71**

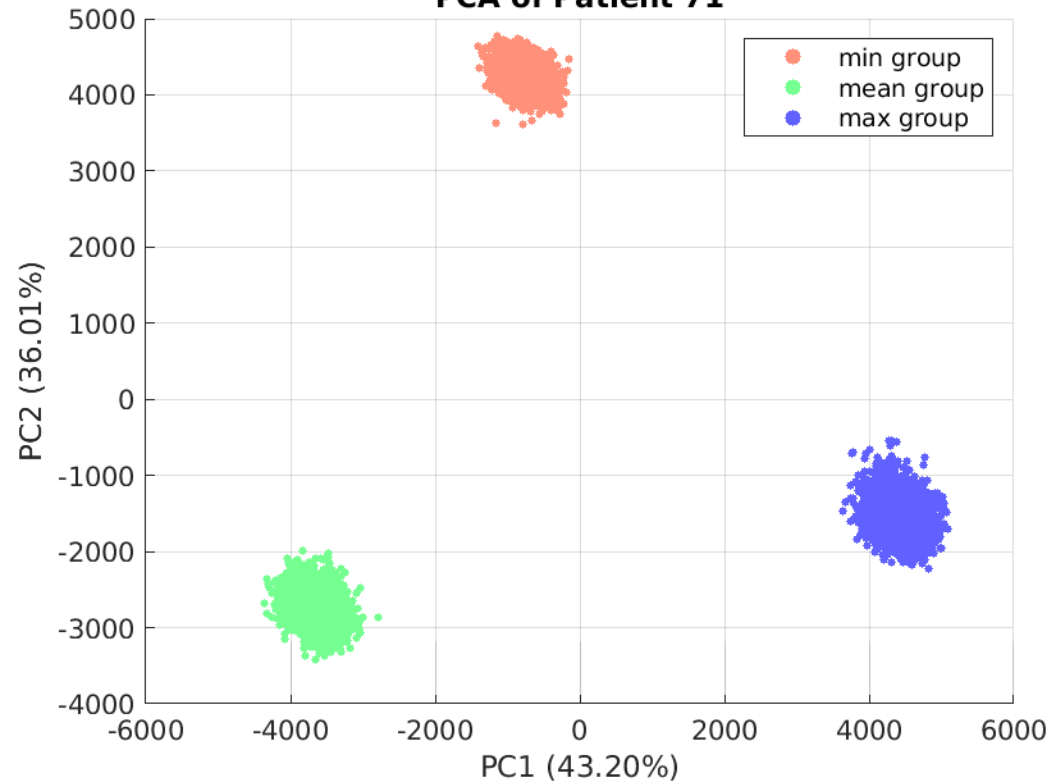

**PCA of Patient 72**

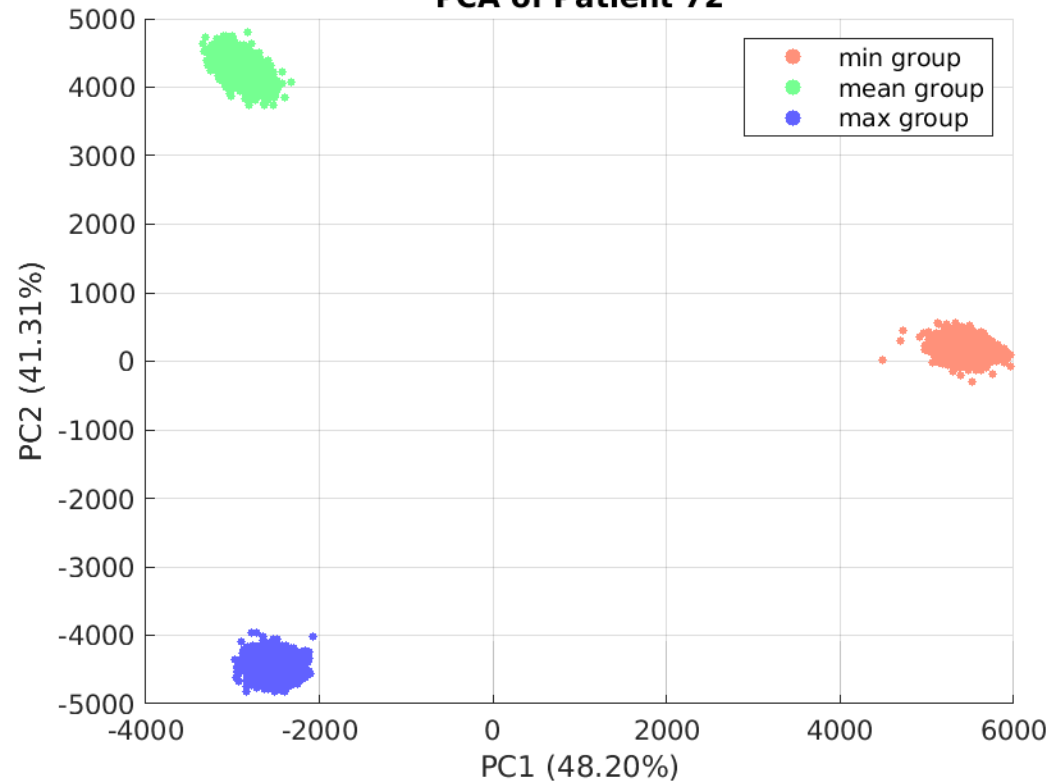



**PCA of Patient 73**

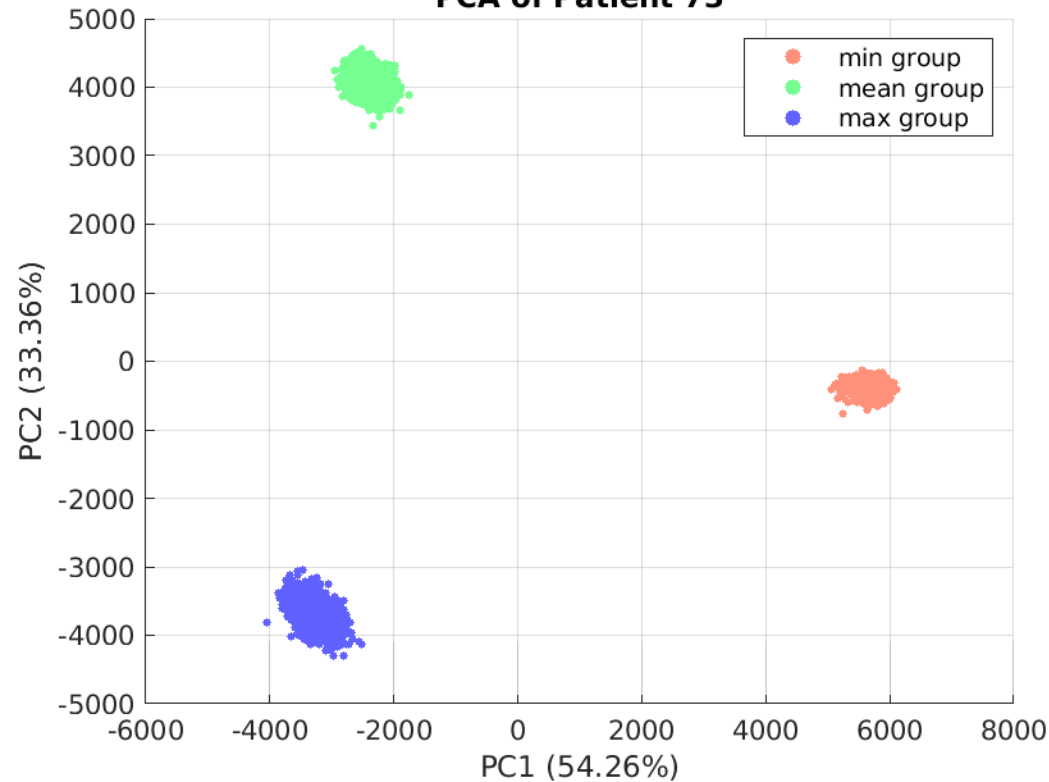

**PCA of Patient 74**

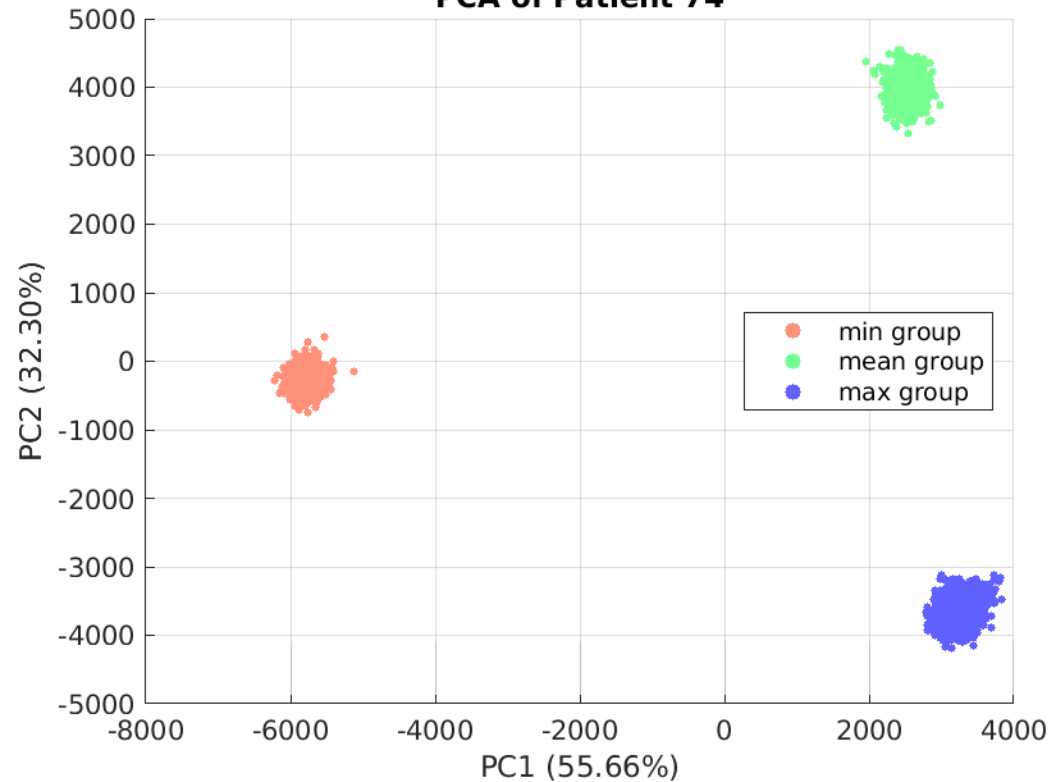

**PCA of Patient 75**

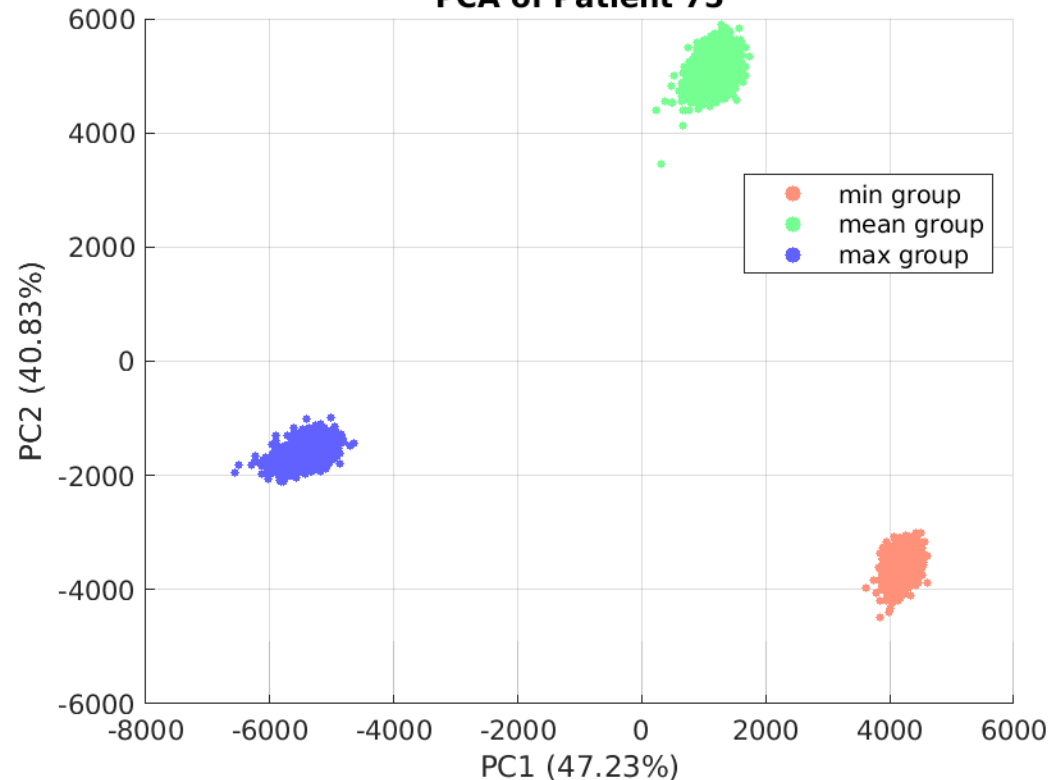

**PCA of Patient 76**

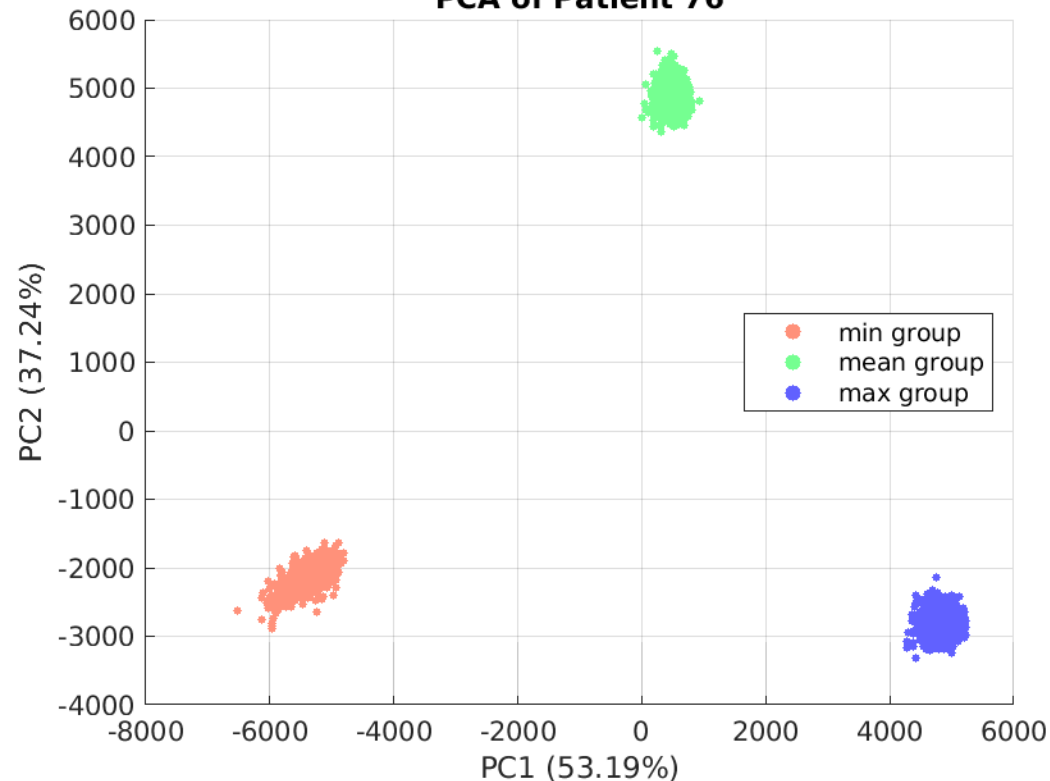

**PCA of Patient 77**

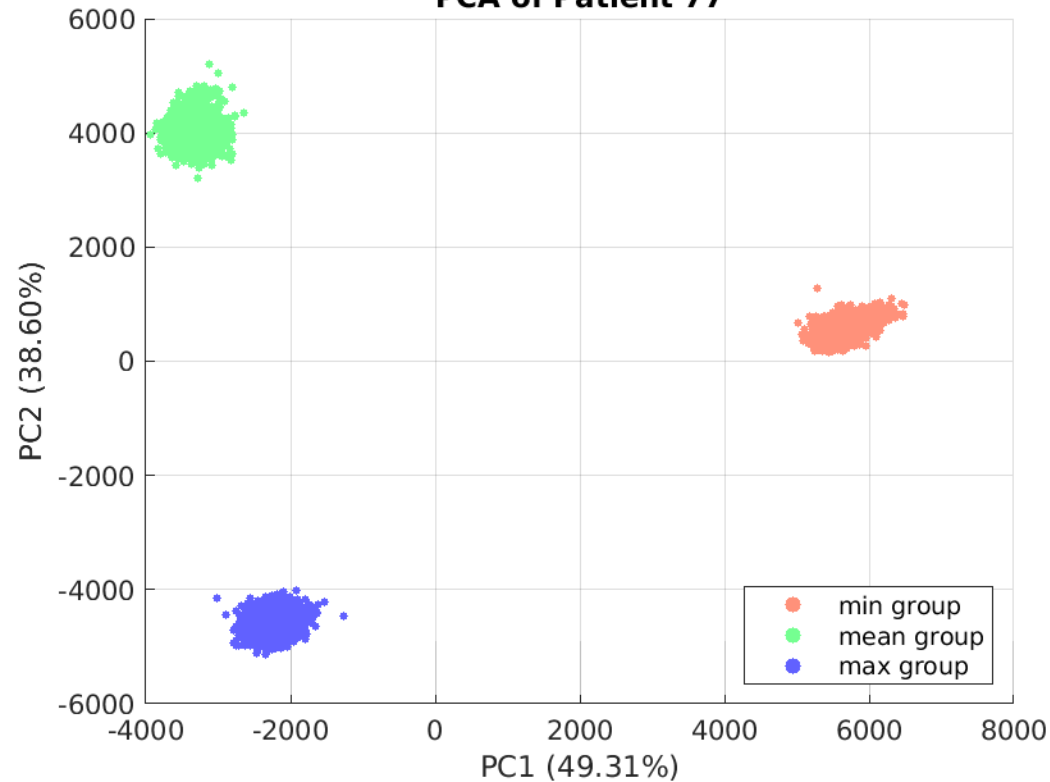

**PCA of Patient 78**

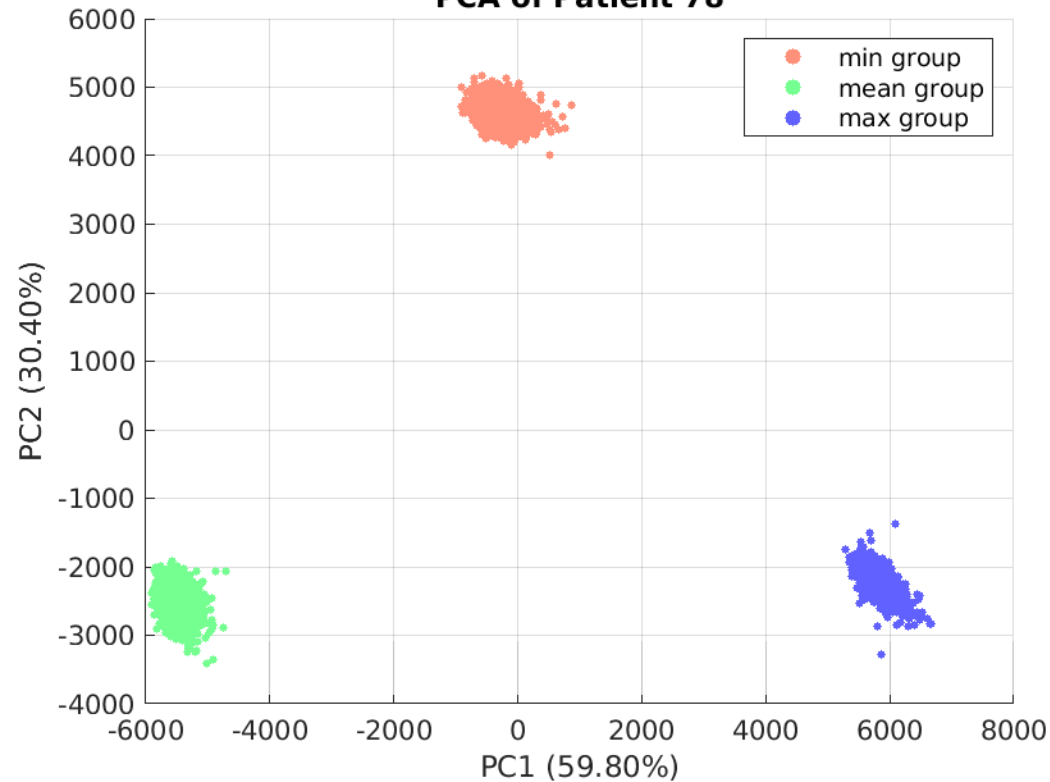

**PCA of Patient 79**

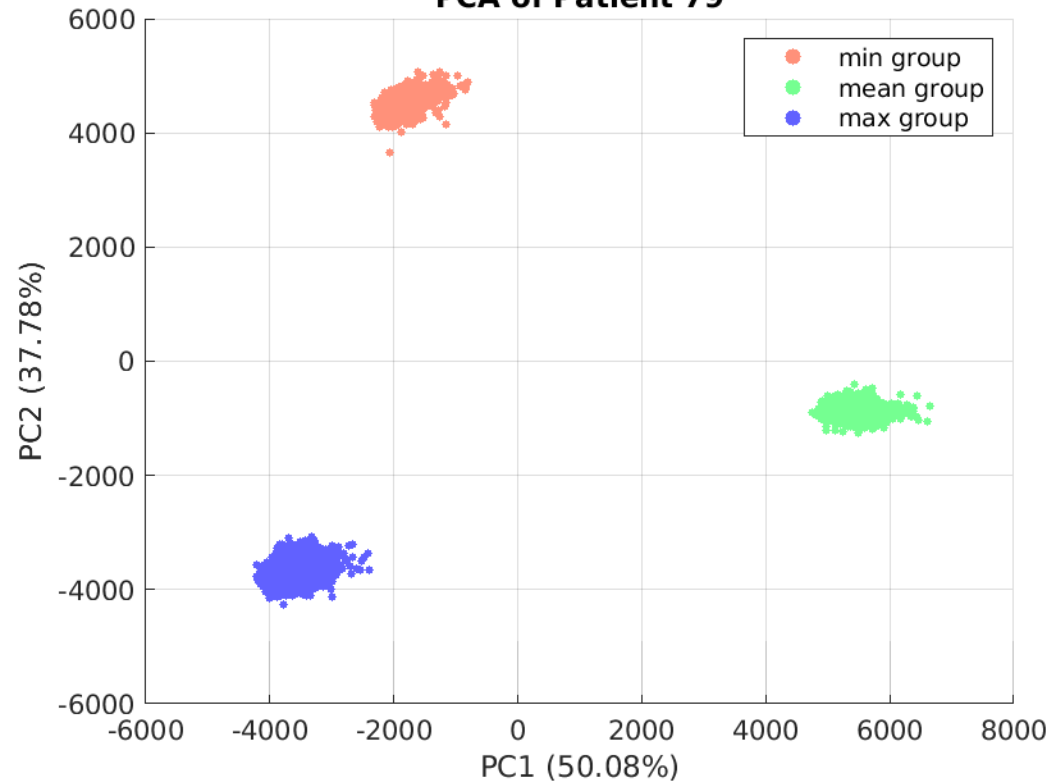

**PCA of Patient 80**

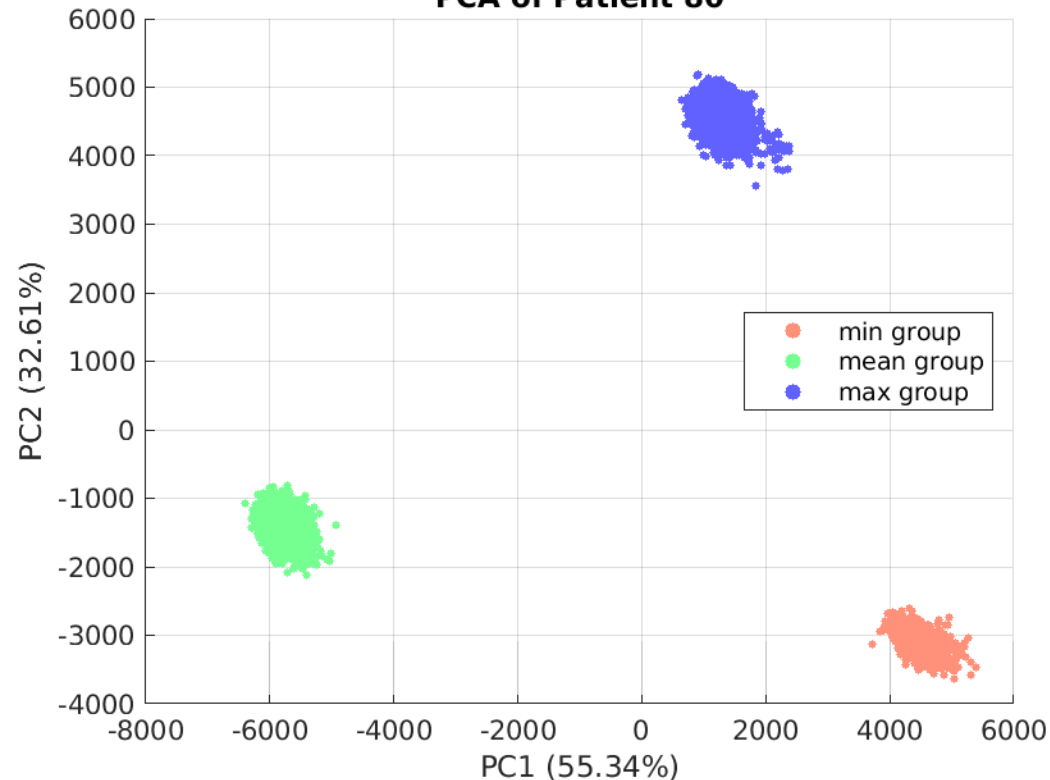



**PCA of Patient 81**

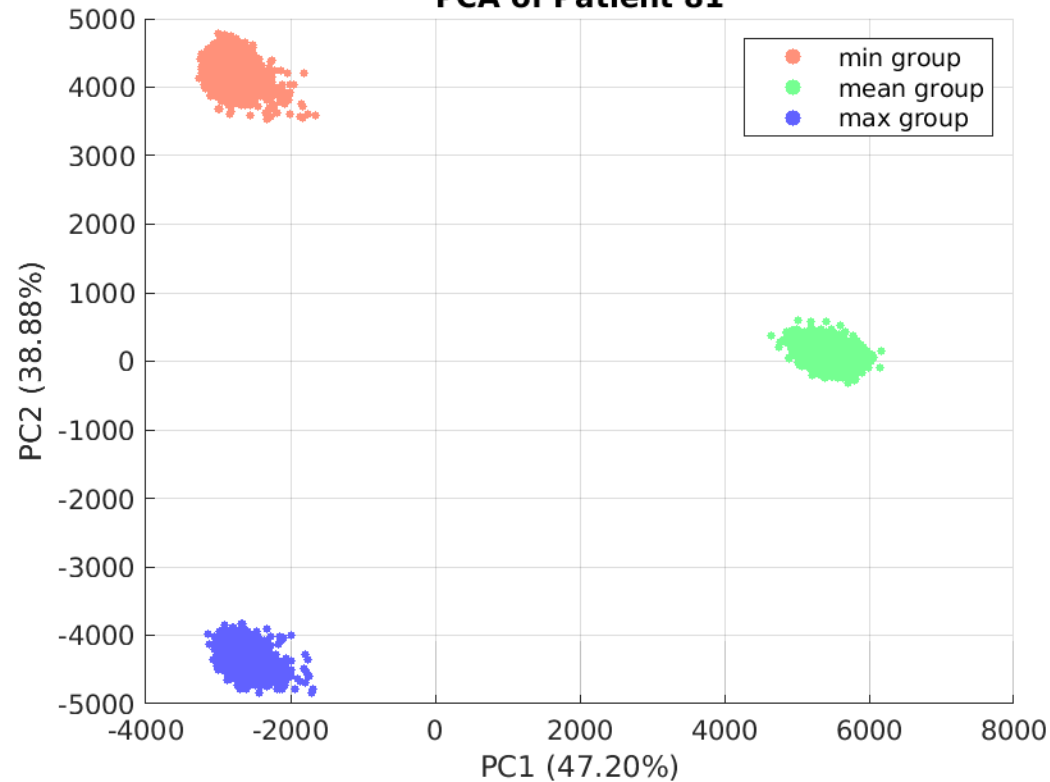

**PCA of Patient 82**

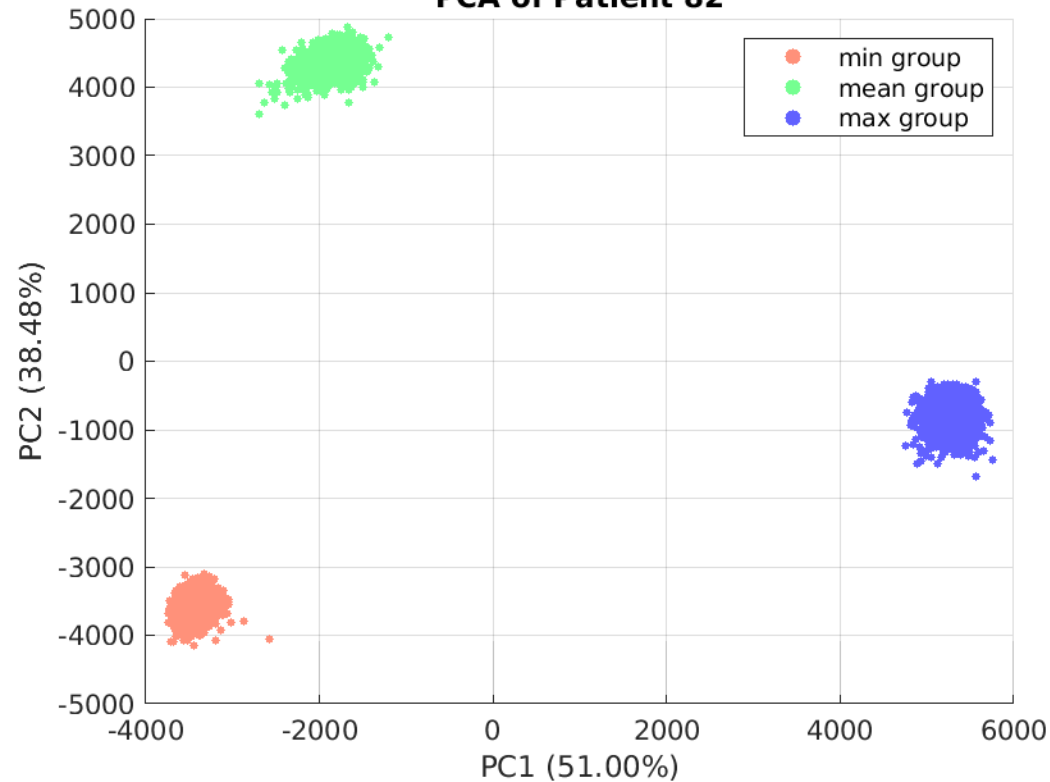

**PCA of Patient 83**

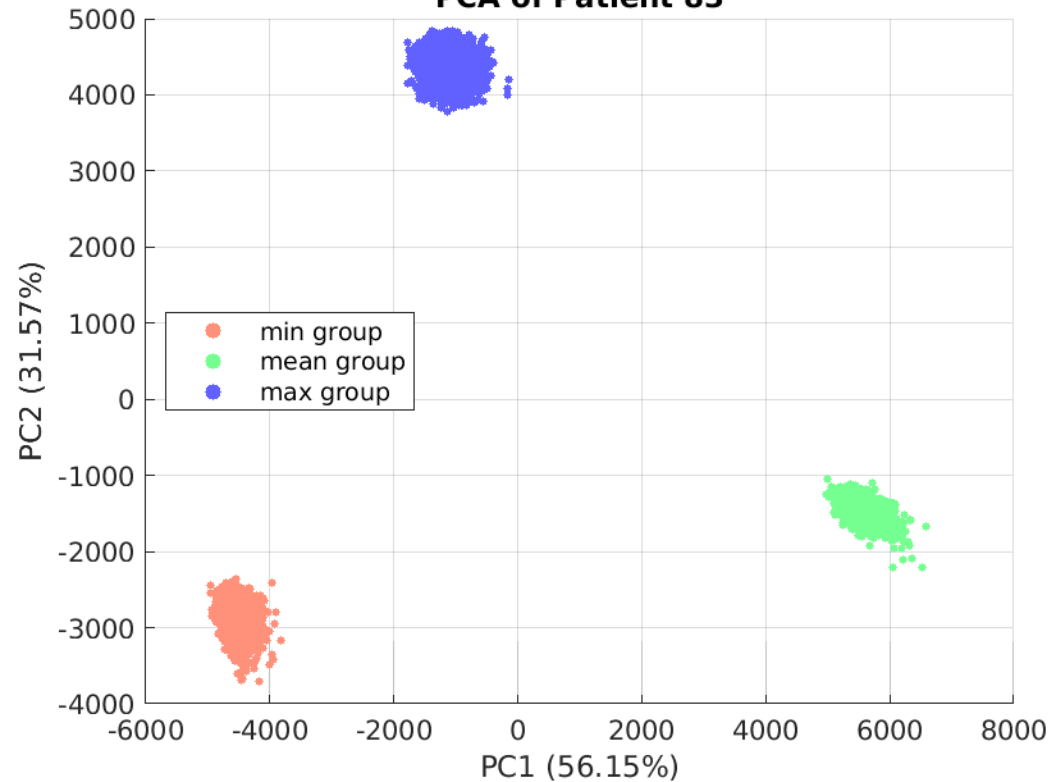

**PCA of Patient 84**

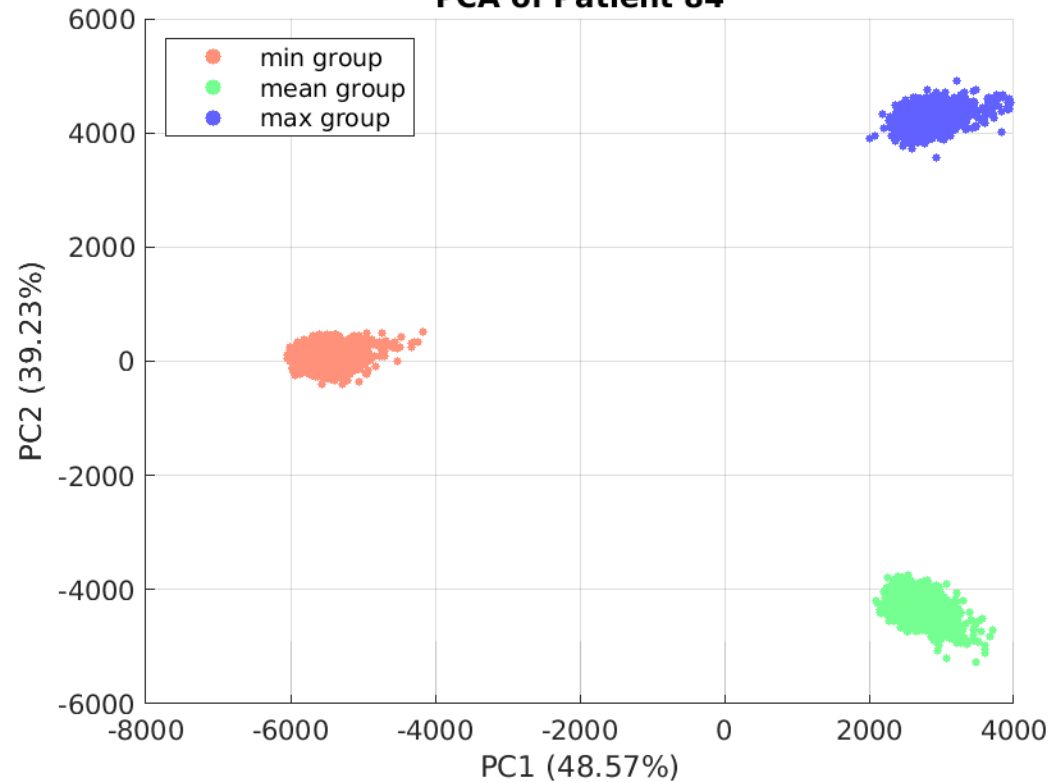

**PCA of Patient 85**

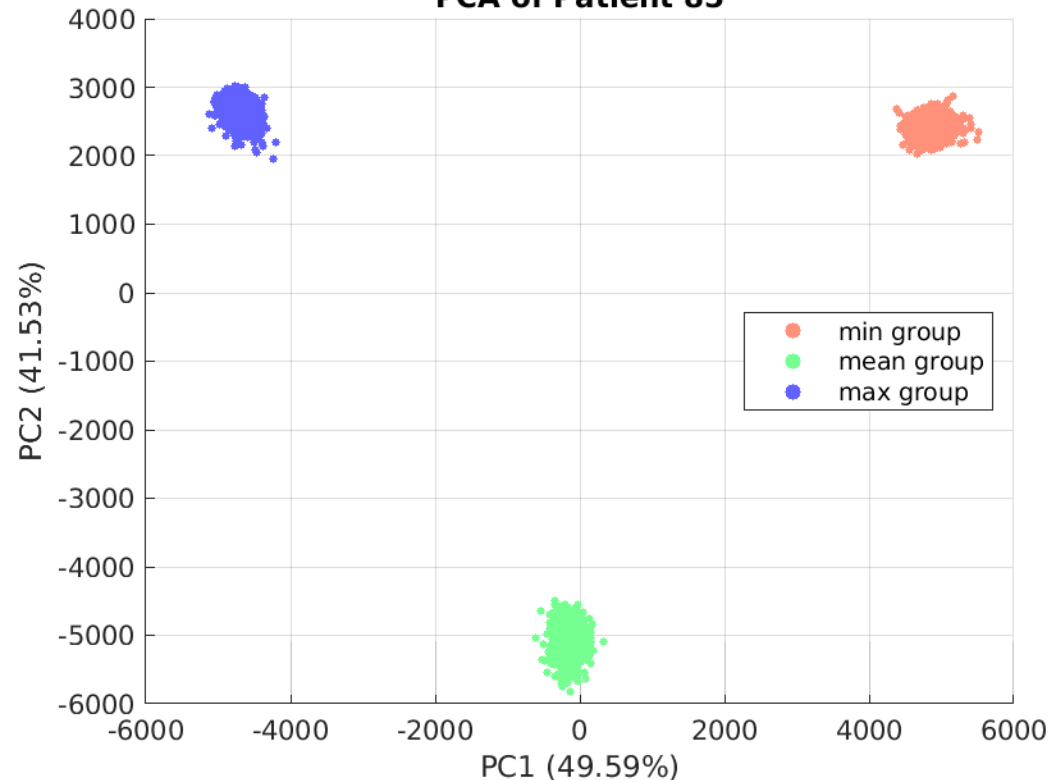

**PCA of Patient 86**

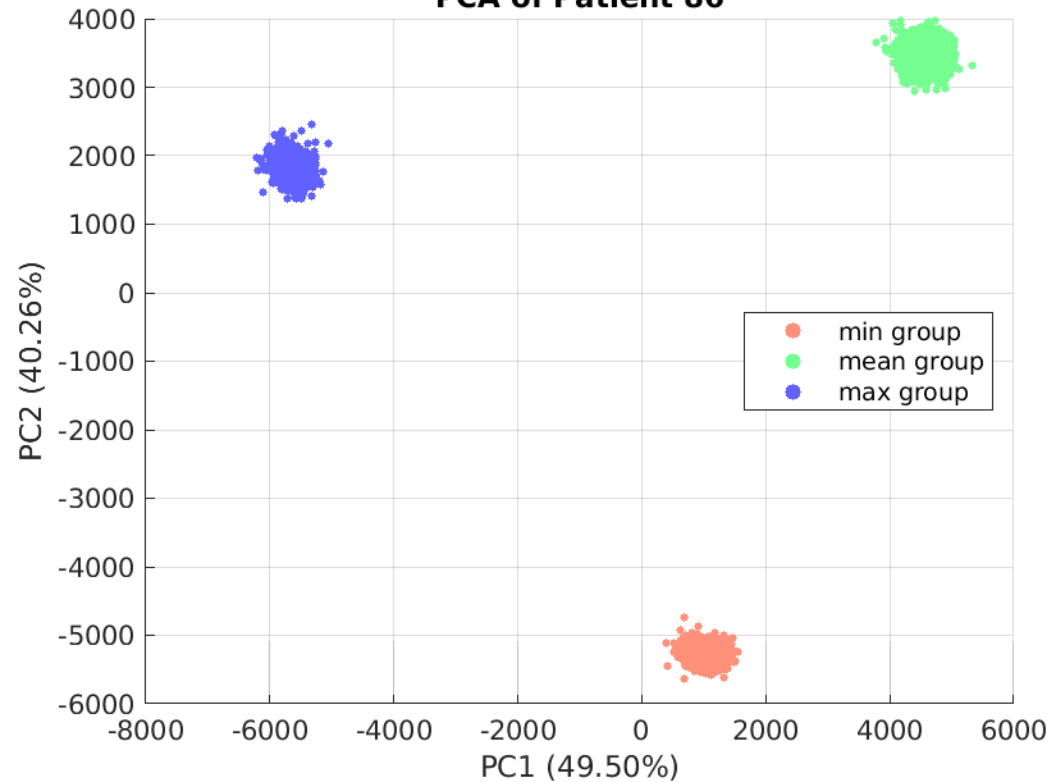

**PCA of Patient 87**

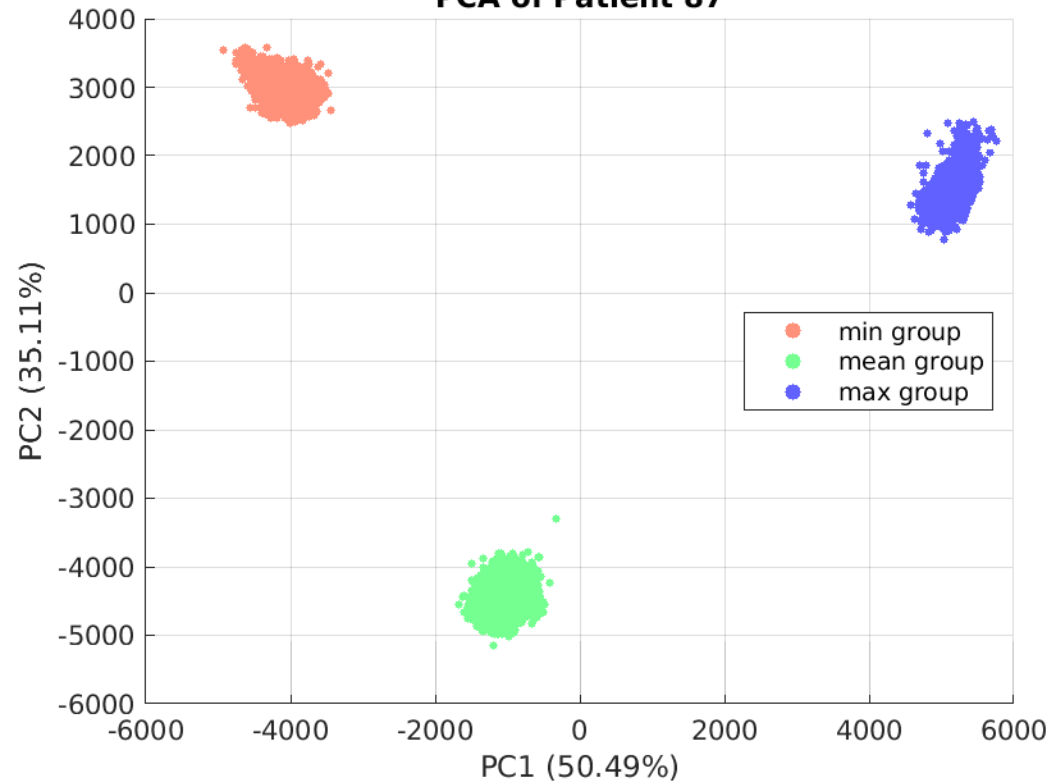

**PCA of Patient 88**

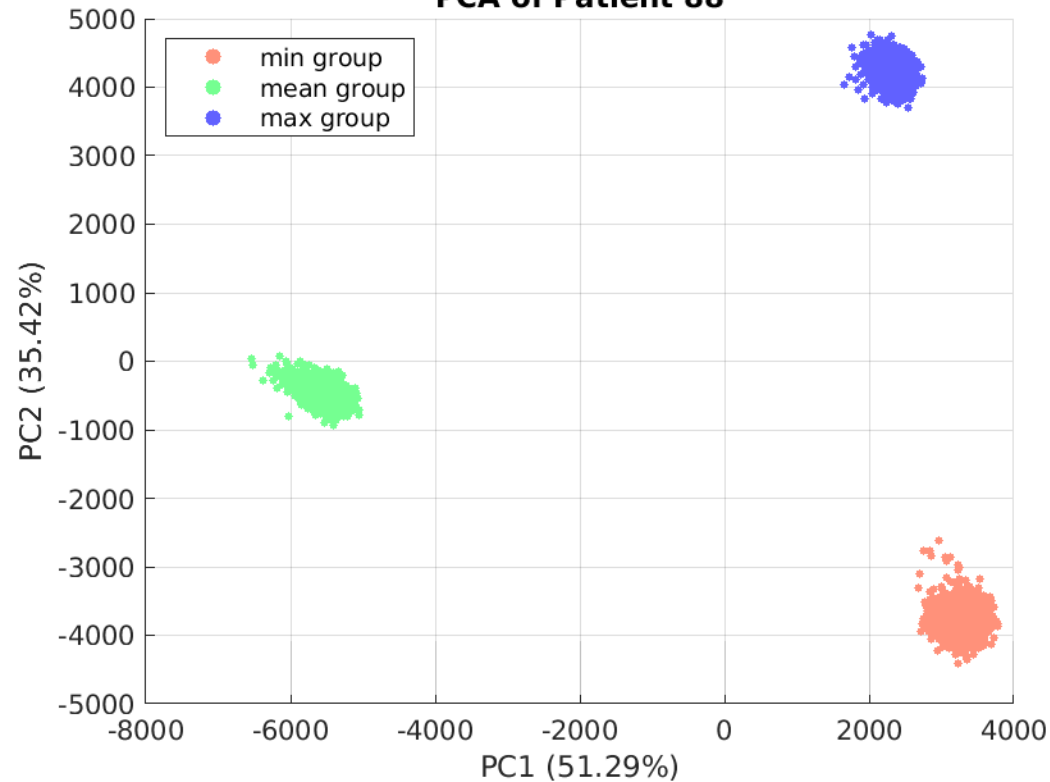



**PCA of Patient 89**

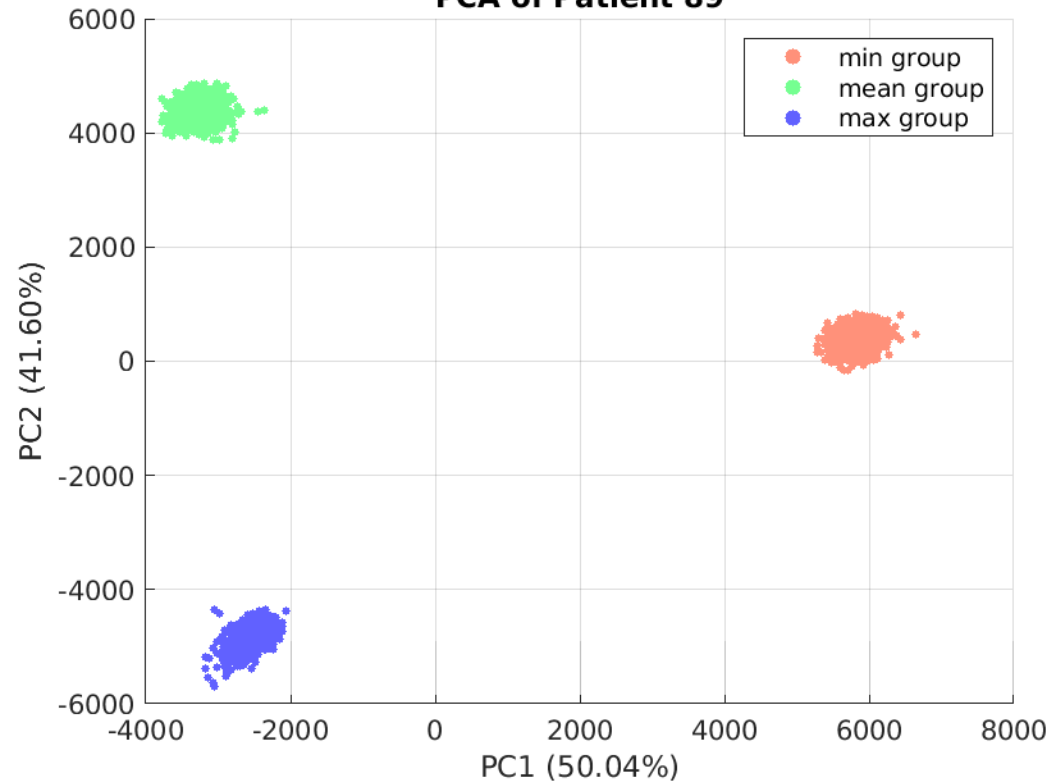

**PCA of Patient 90**

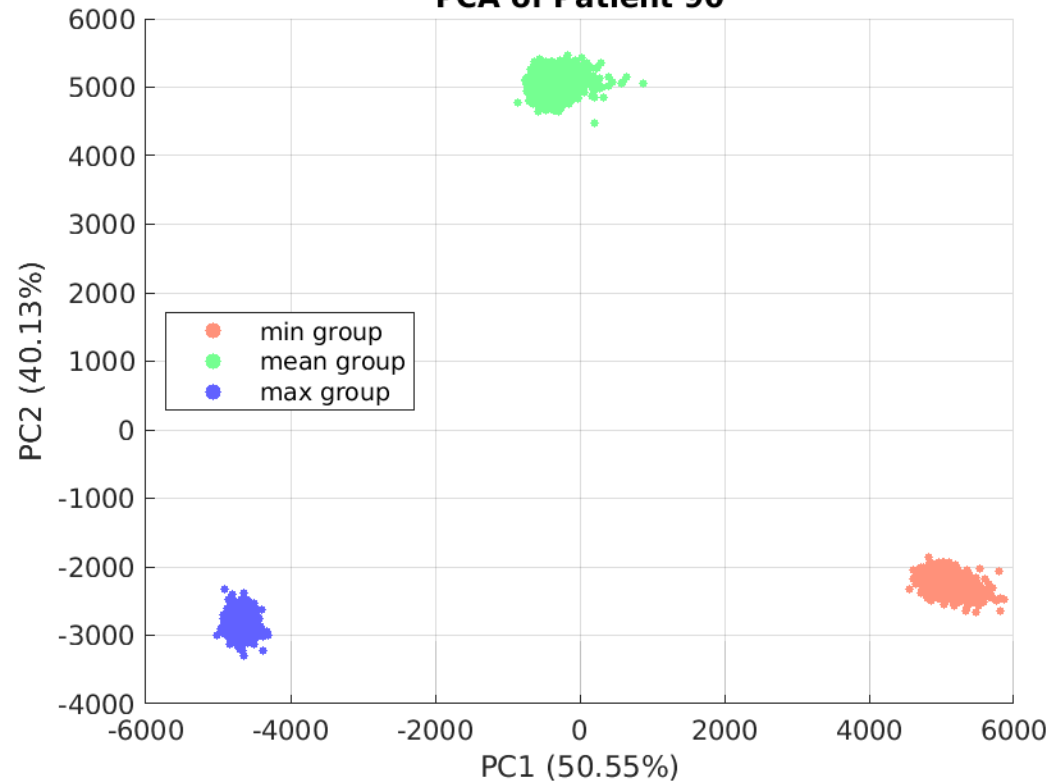

**PCA of Patient 91**

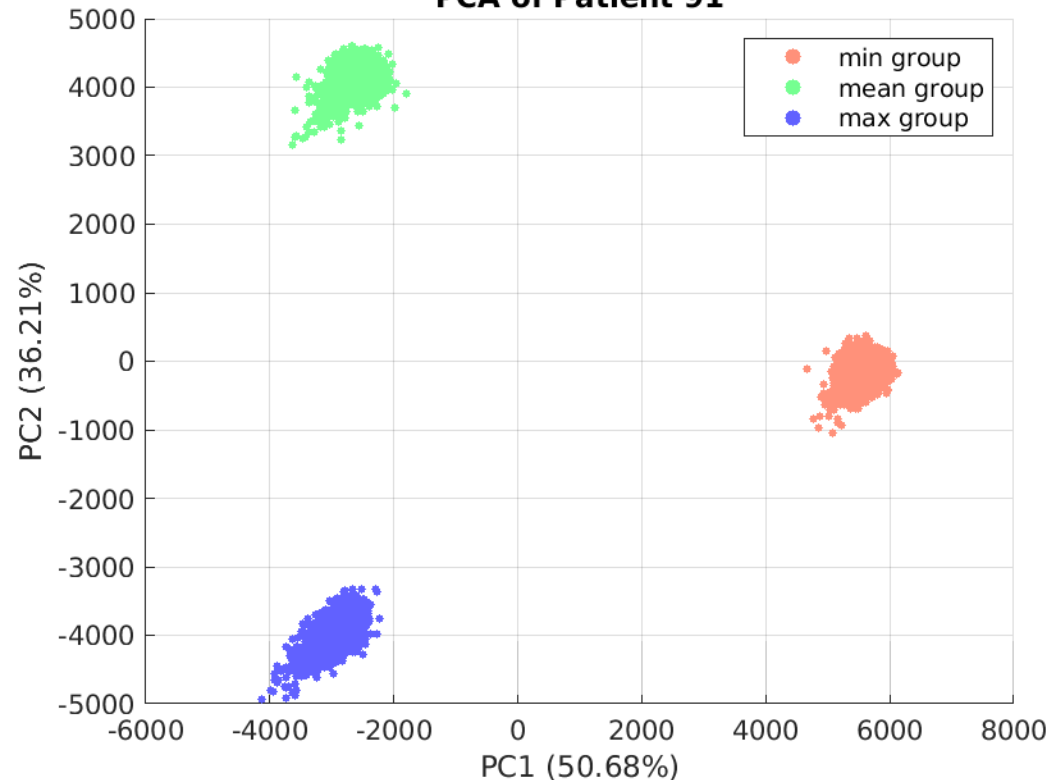

**PCA of Patient 92**

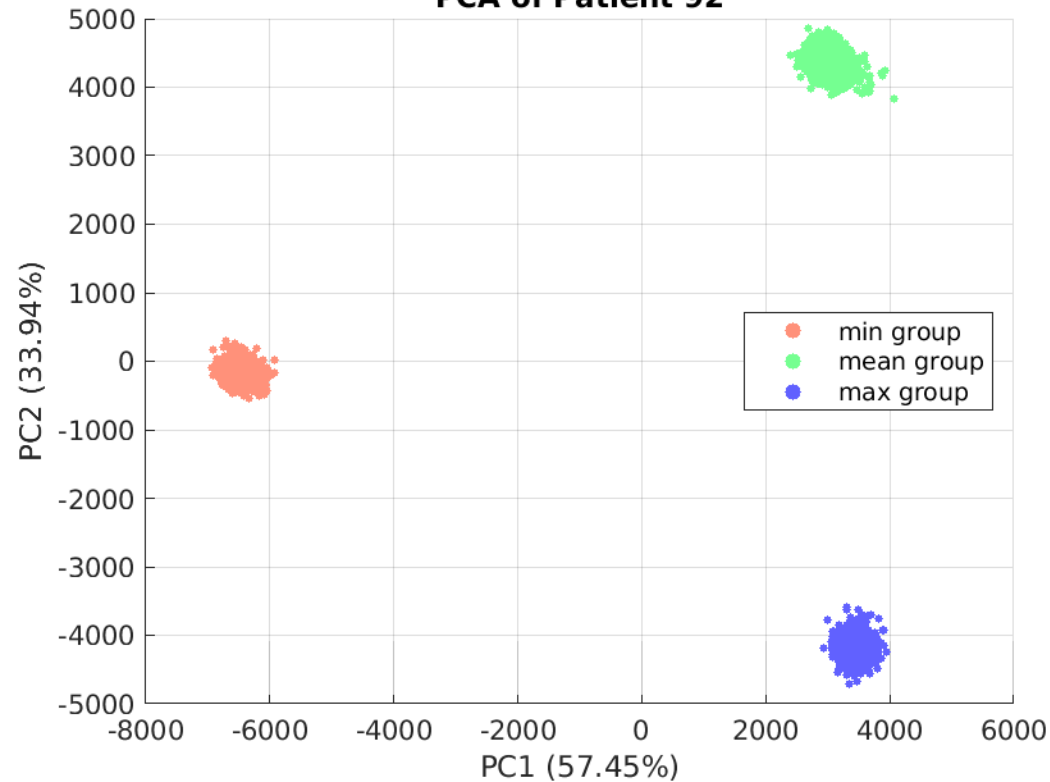

**PCA of Patient 93**

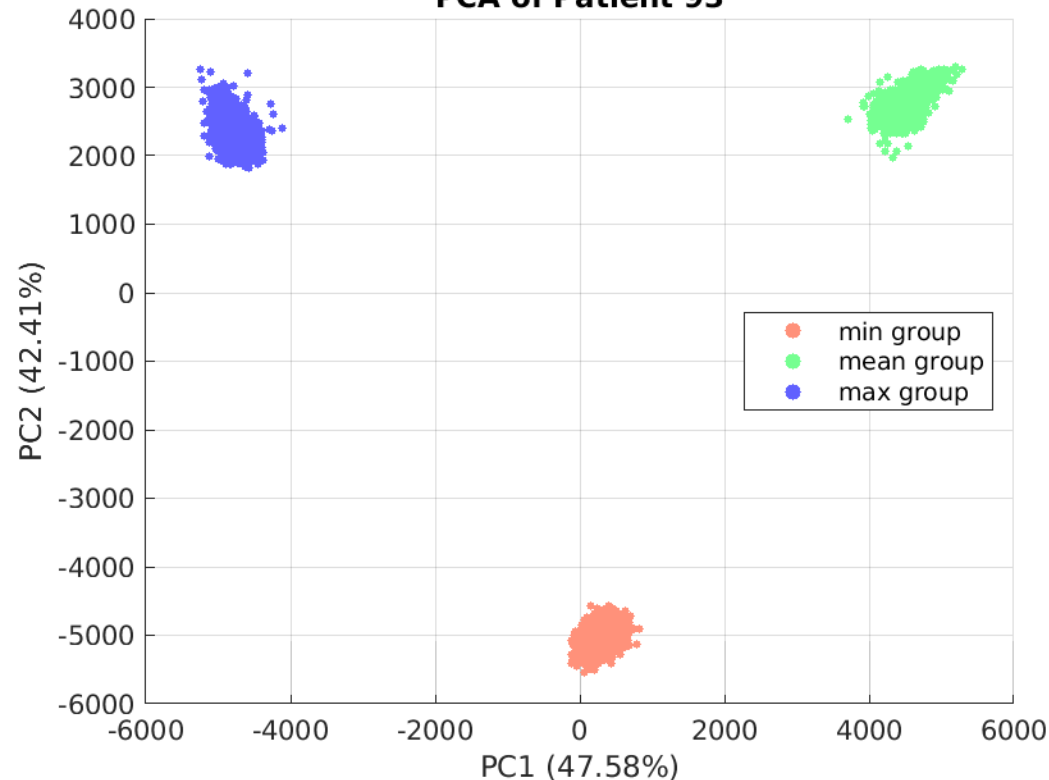

**PCA of Patient 94**

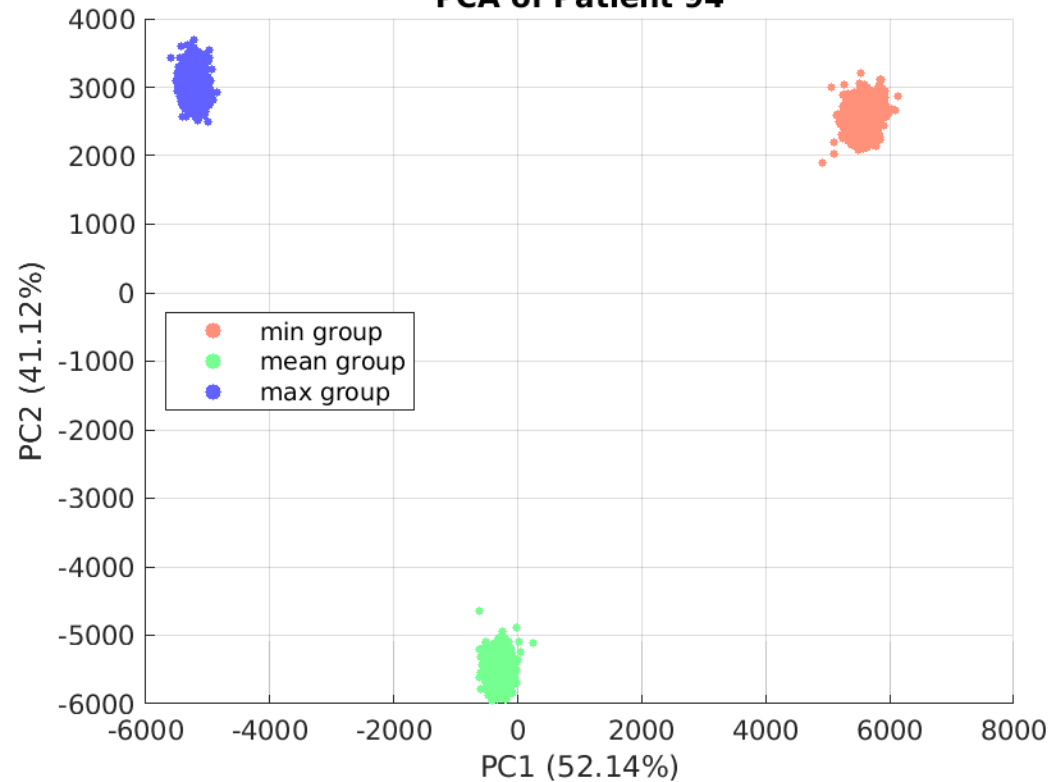

**PCA of Patient 95**

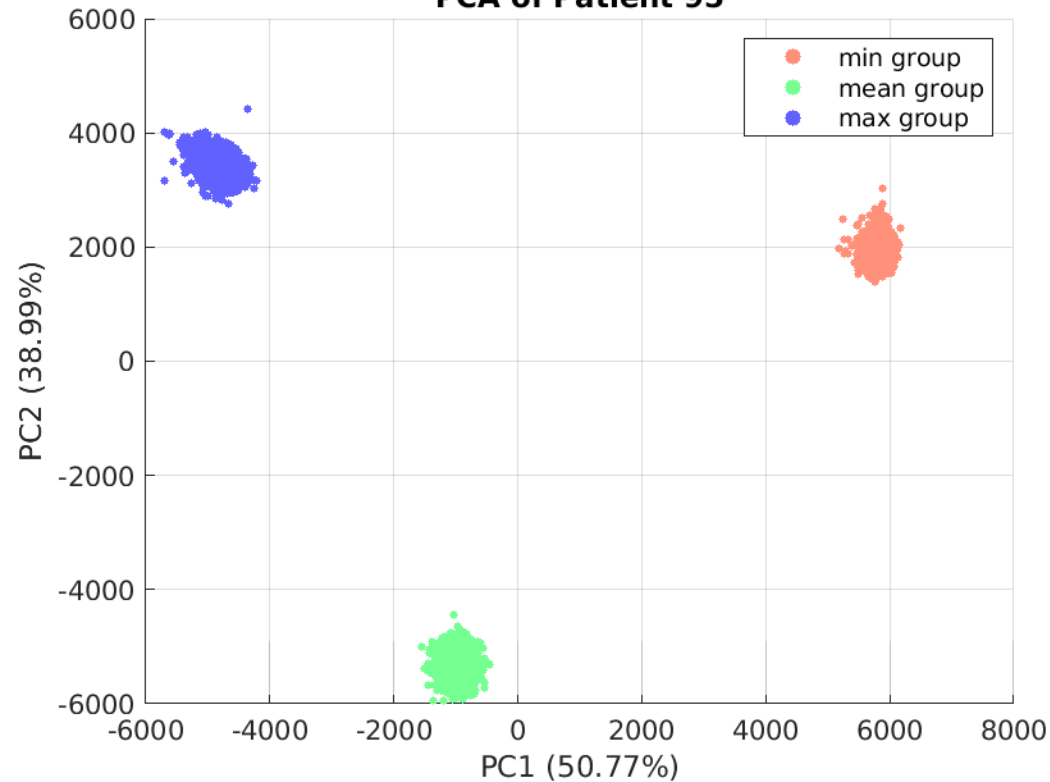

Supplement: Supplementary file 1 [file supplementary]
