# Supplementary material for: Integrating Genome-Scale Metabolic Models with Patient Plasma Metabolome to Study Endothelial Metabolism In Situ
Source: Preprints.org preprint supplement (doi:10.20944/preprints202403.0136.v1), 2024-03-04
Supplement: Supplementary file 1 [file supplementary]

**Supplementary Material 5: Clustering analisys plots**

- Clustering analysis of the whole dataset


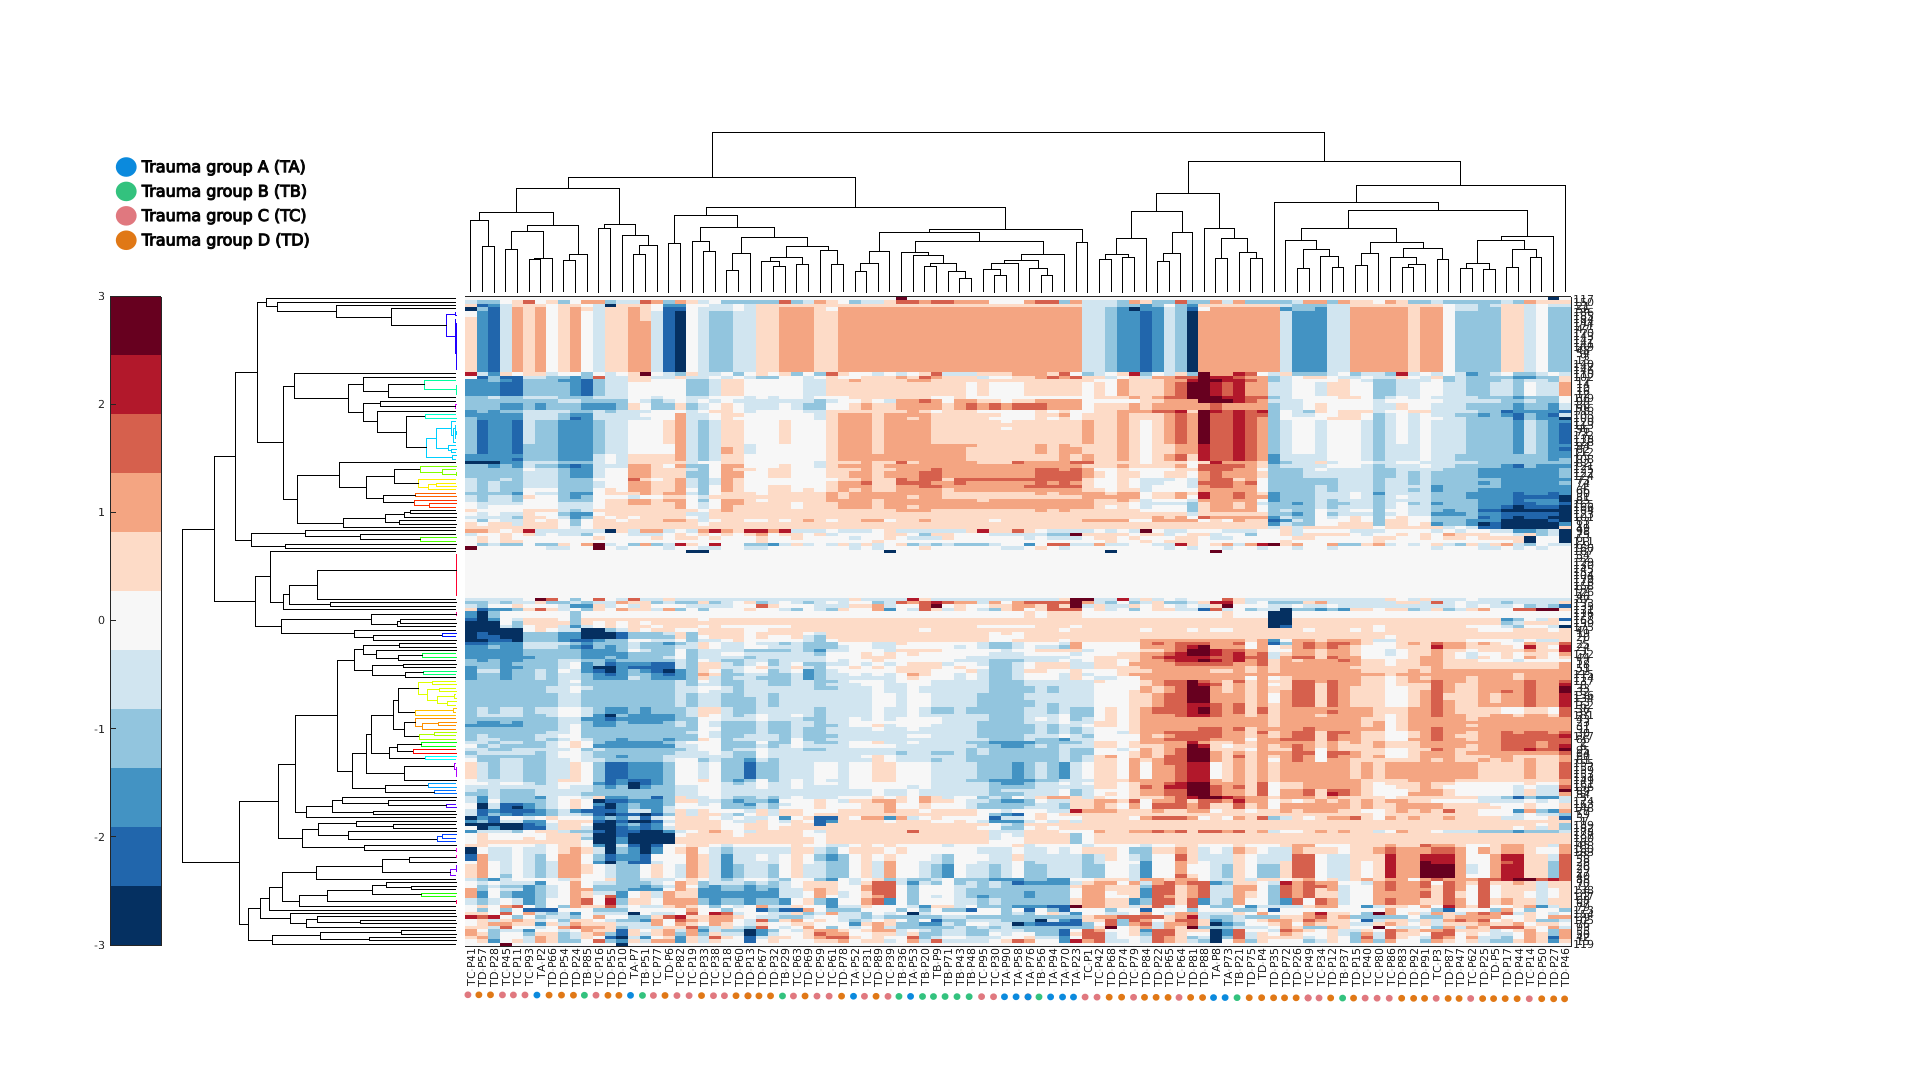
Figure S1: Heat map and dendrogram of the 190 metabolic tasks and 95 trauma patients. Data standardized by column


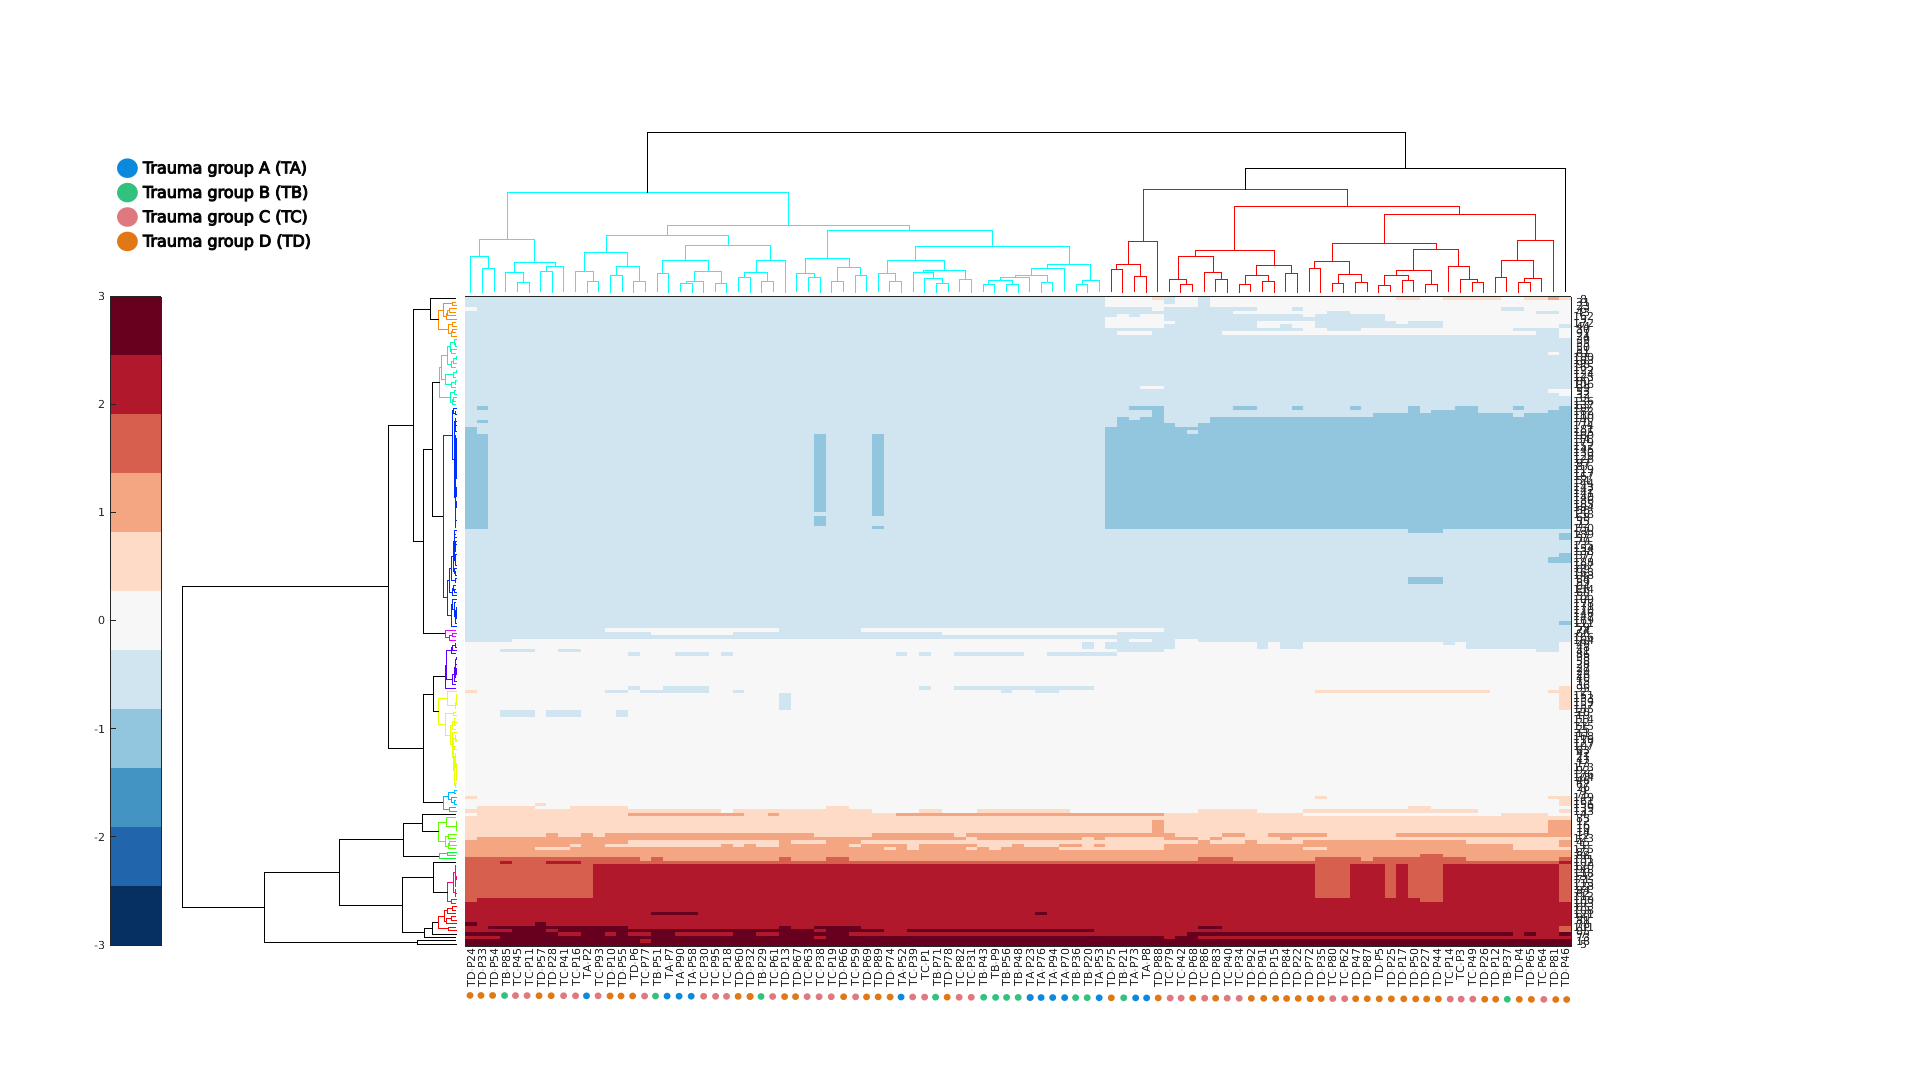


Figure S2: Heat map and dendrogram of the 190 metabolic tasks and 95 trauma patients. Data standardized by row

- Clustering analysis of Trauma group A


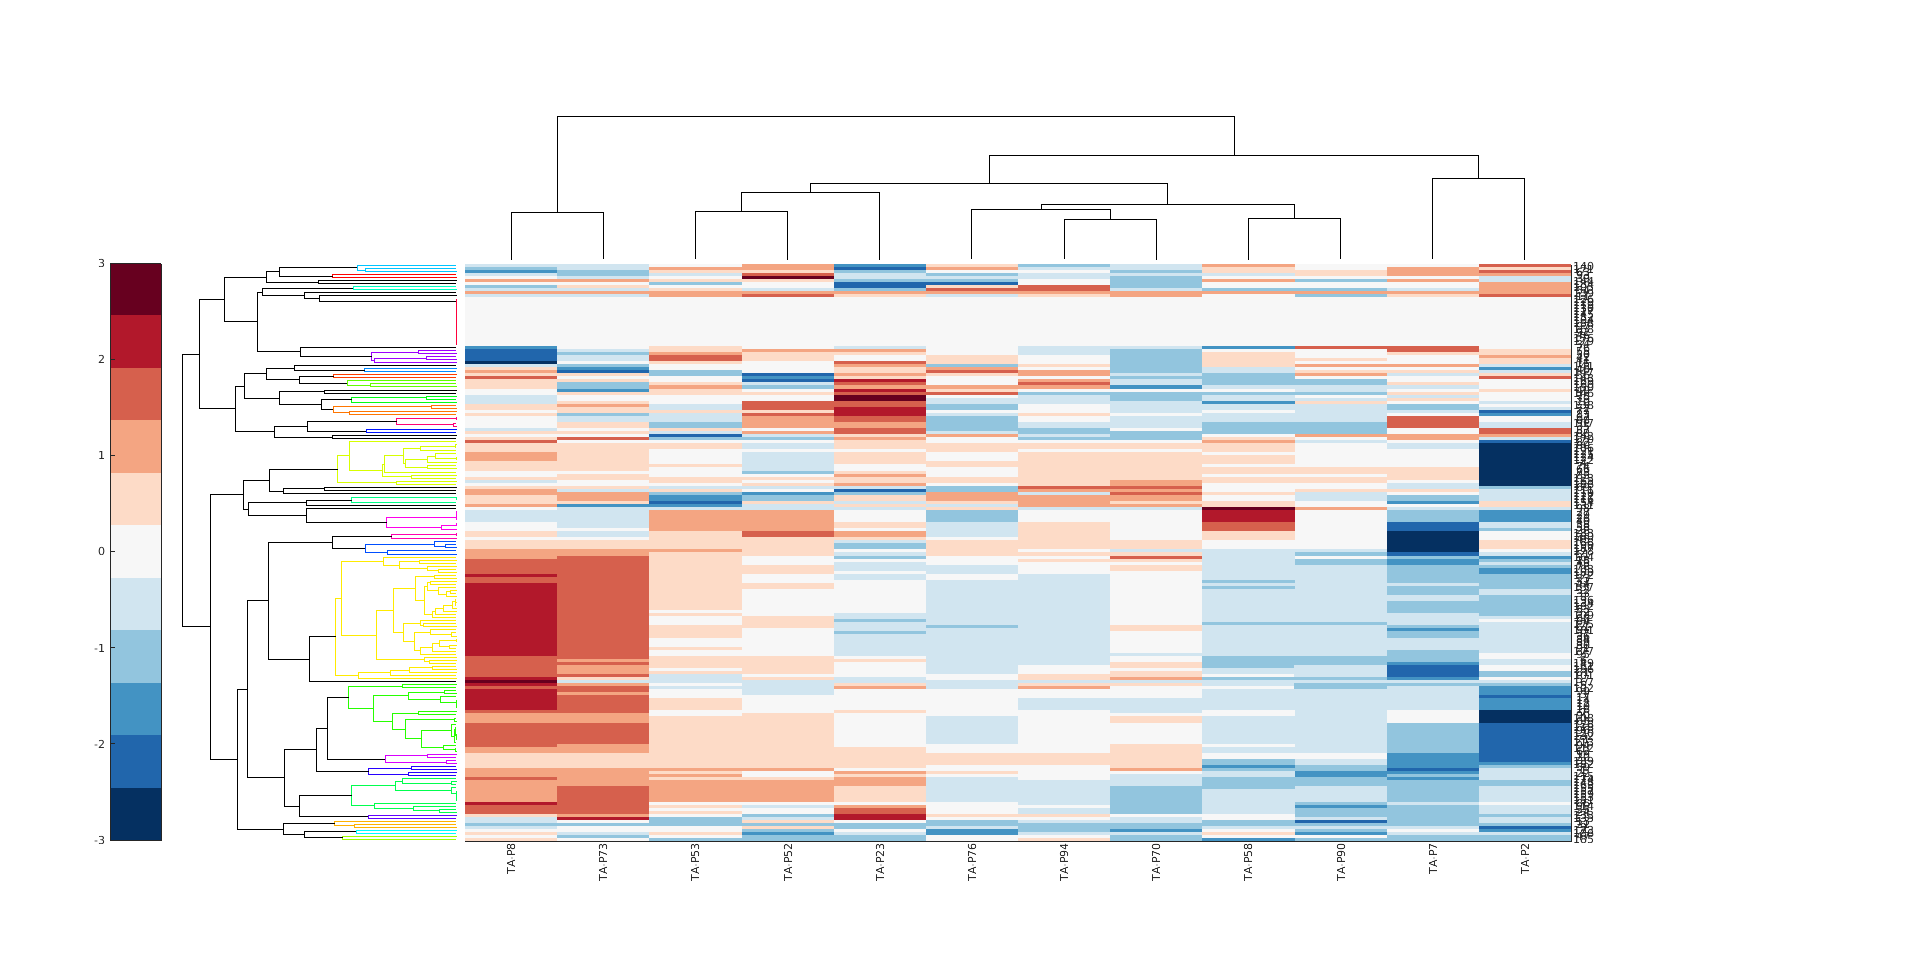
Figure S3: Heat map and dendrogram of the 190 metabolic tasks and trauma group A. Data standardized by column


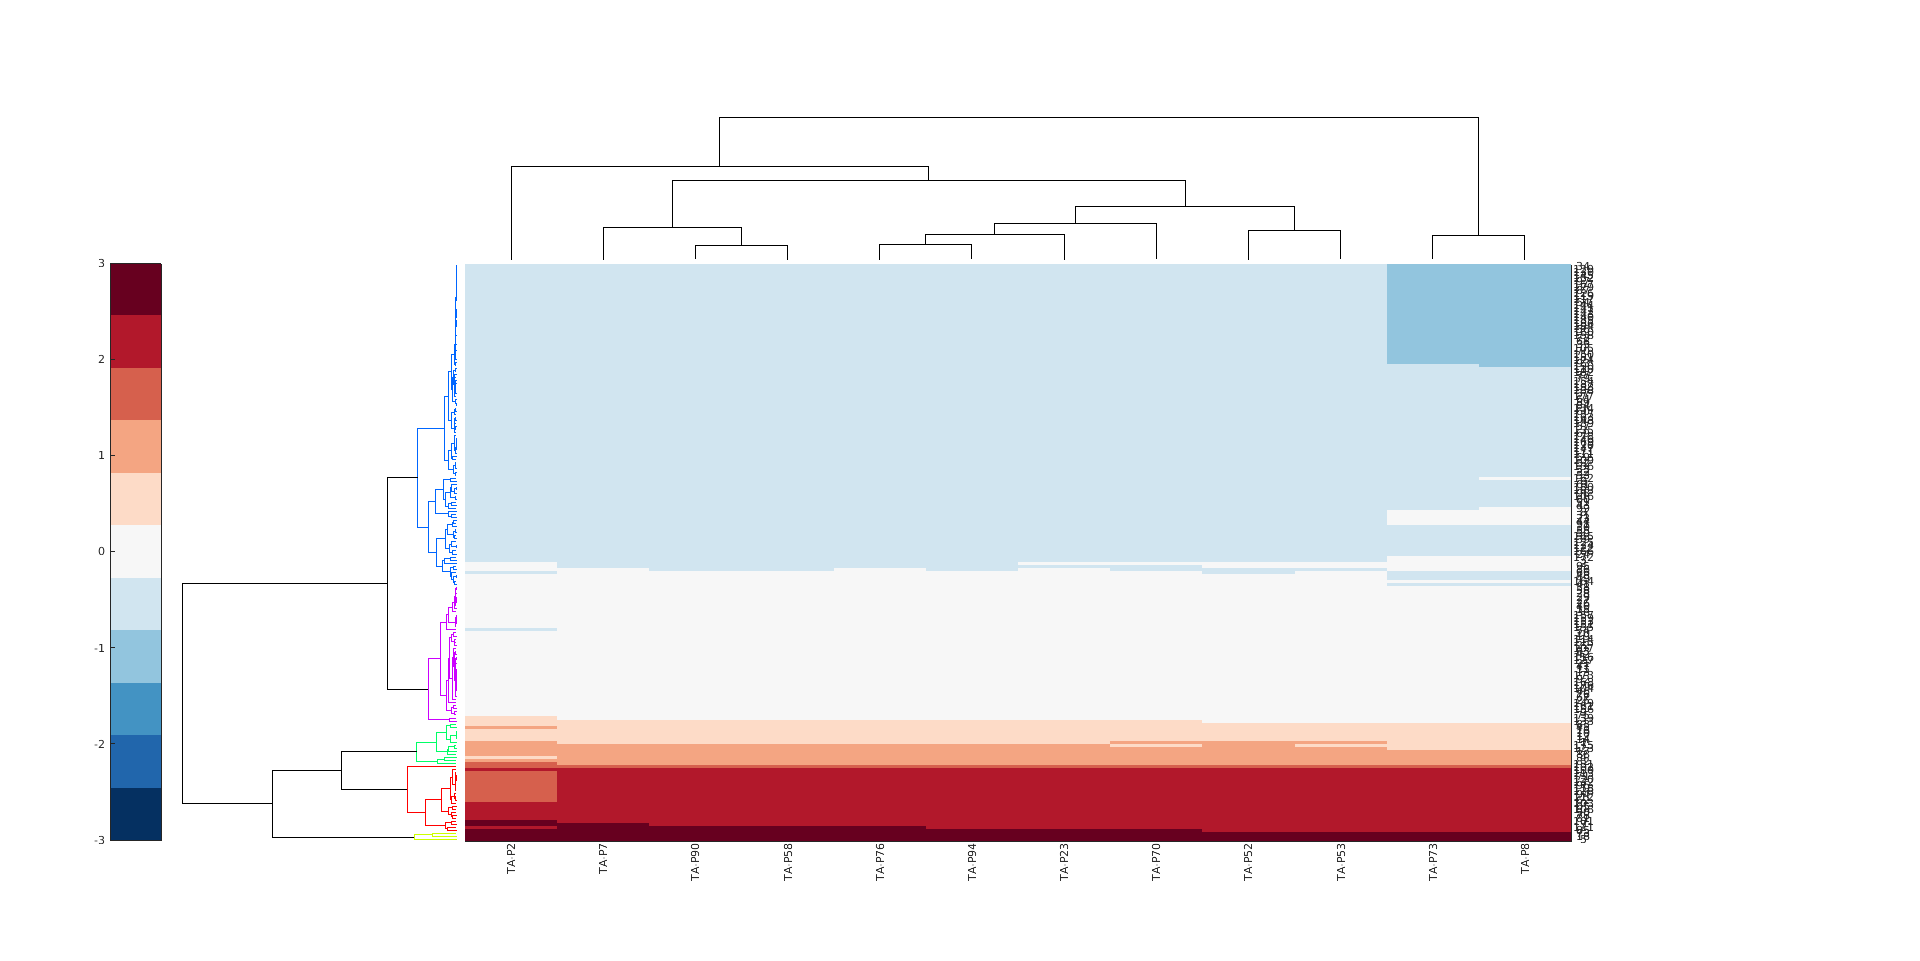
Figure S4: Heat map and dendrogram of the 190 metabolic tasks and trauma group A. Data standardized by row

- Clustering analysis of Trauma group B


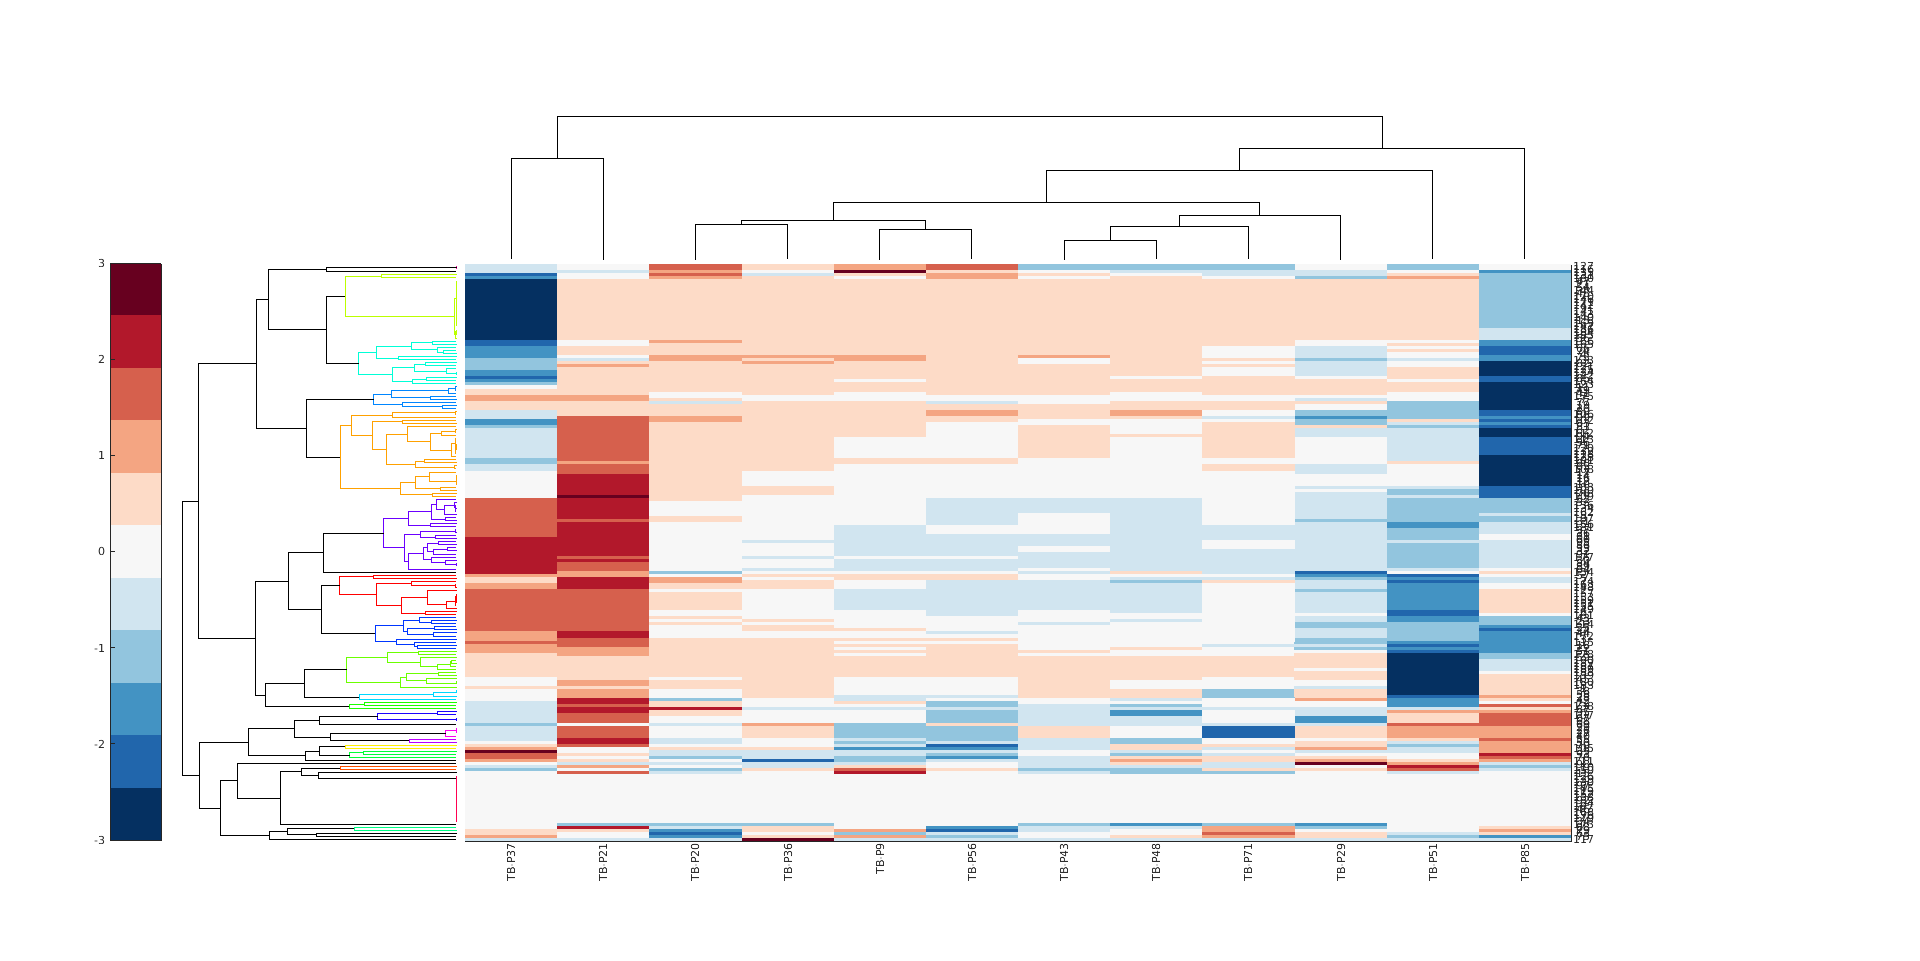


Figure S5: Heat map and dendrogram of the 190 metabolic tasks and trauma group B. Data standardized by column


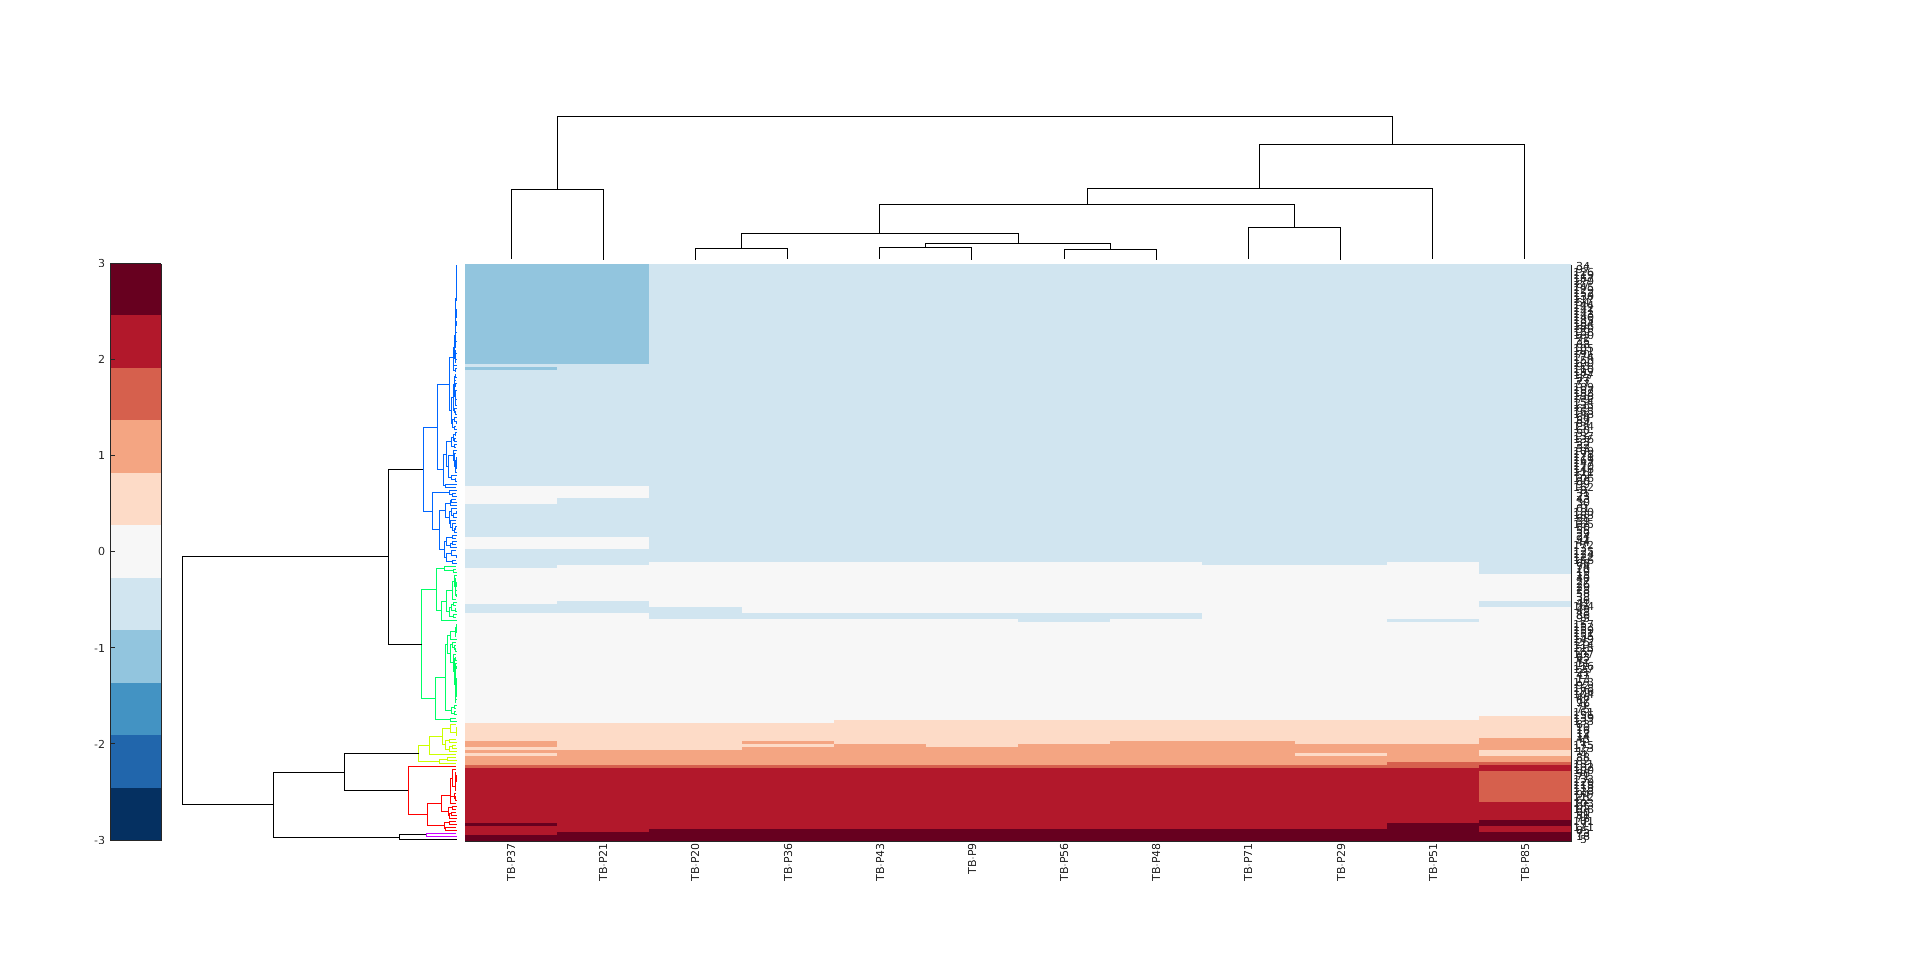


Figure S6: Heat map and dendrogram of the 190 metabolic tasks and trauma group B. Data standardized by row

- Clustering analysis of Trauma group C


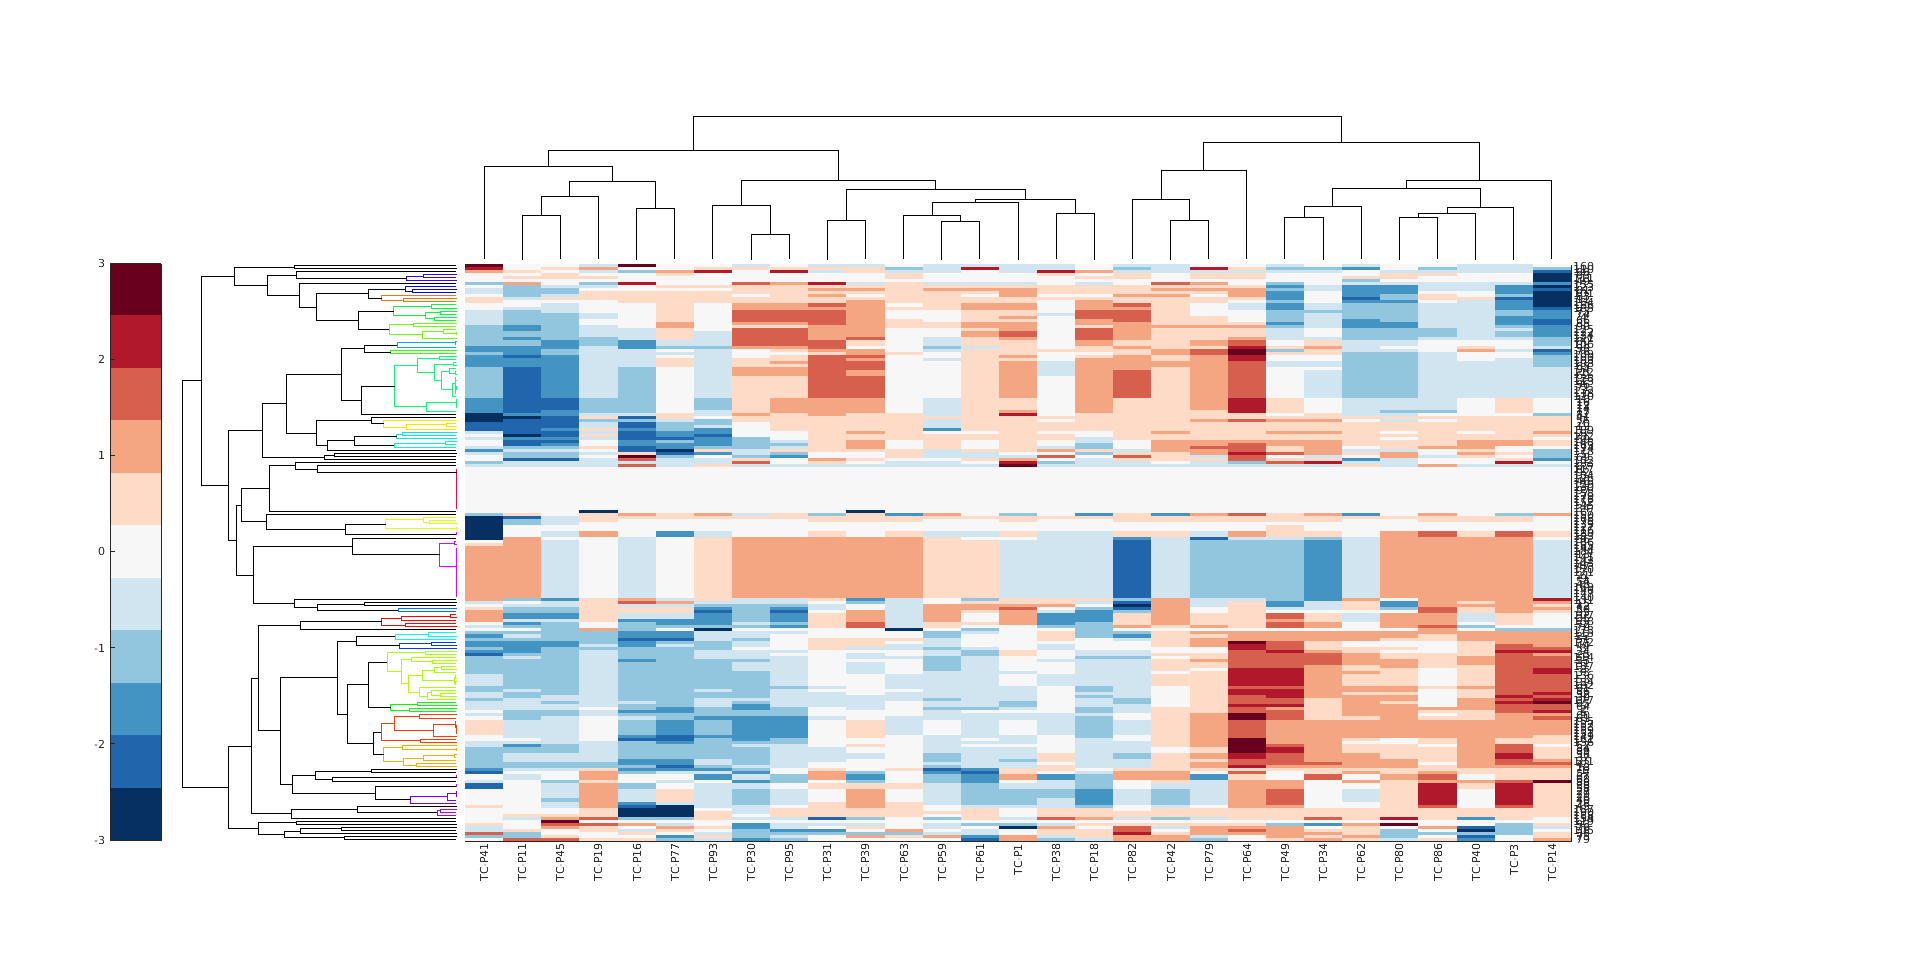


Figure S7: Heat map and dendrogram of the 190 metabolic tasks and trauma group C. Data standardized by column


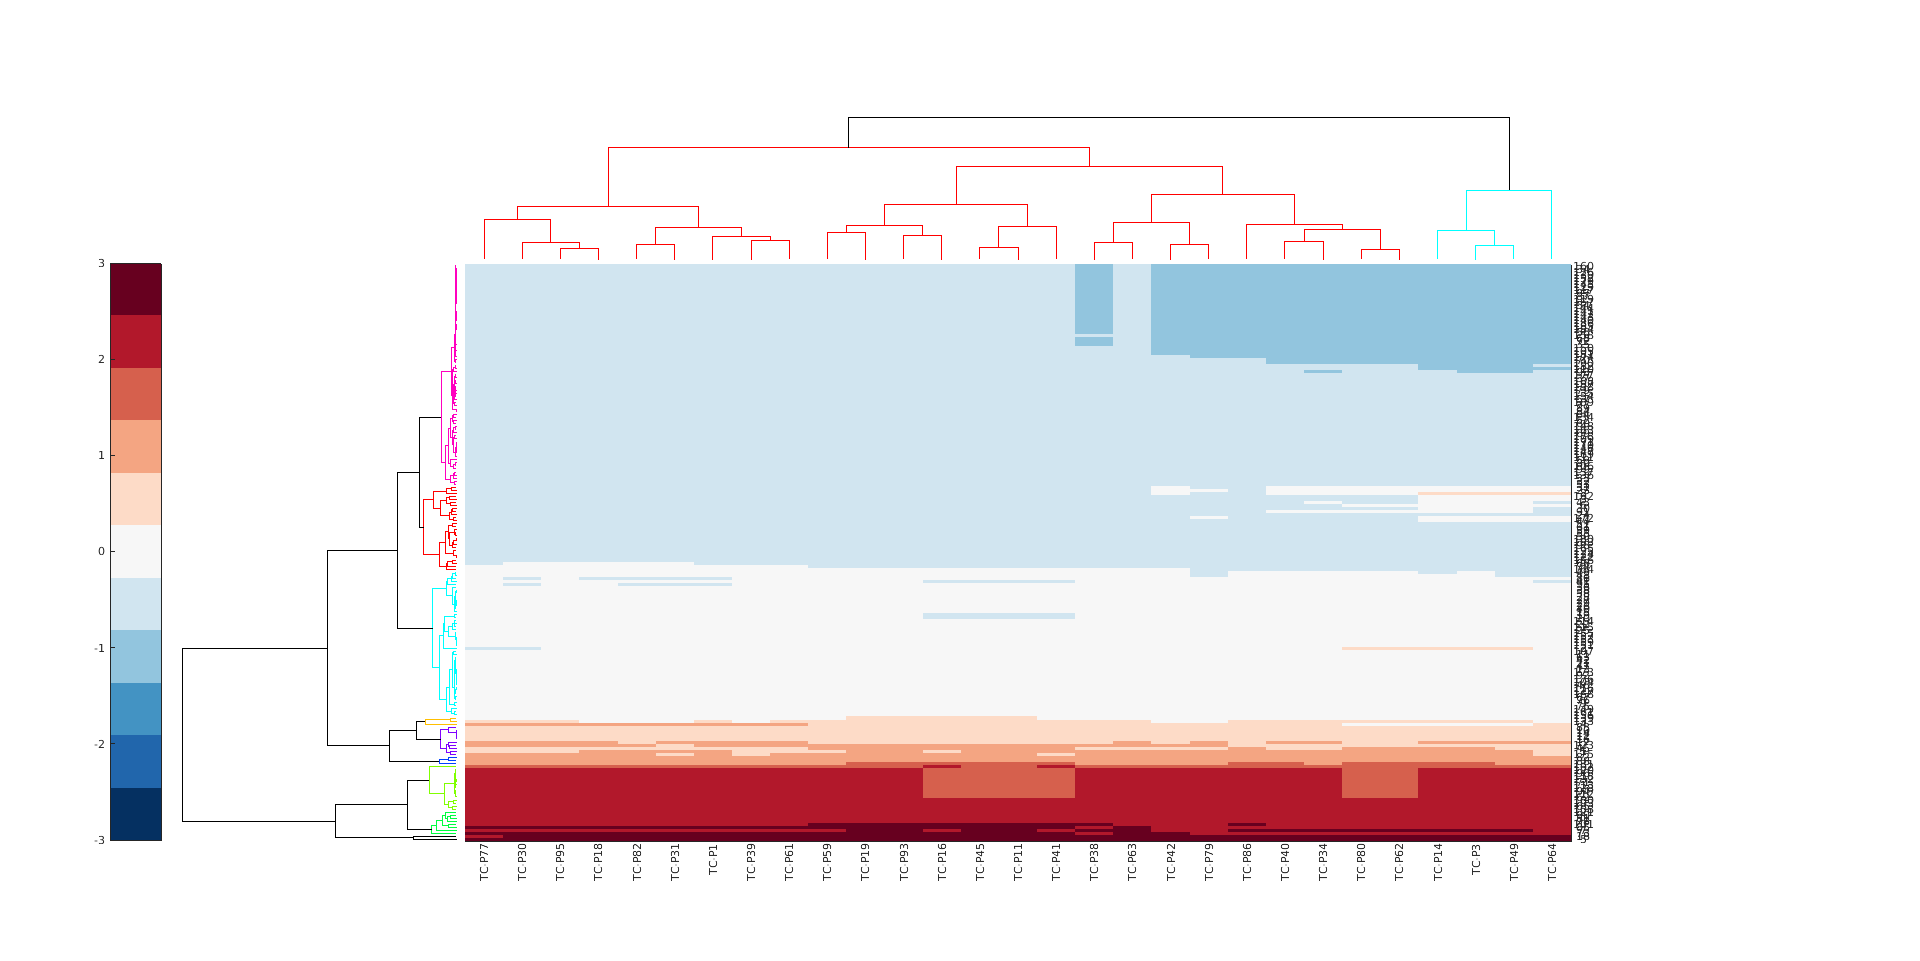


Figure S8: Heat map and dendrogram of the 190 metabolic tasks and trauma group C. Data standardized by row

- Clustering analysis of Trauma group D


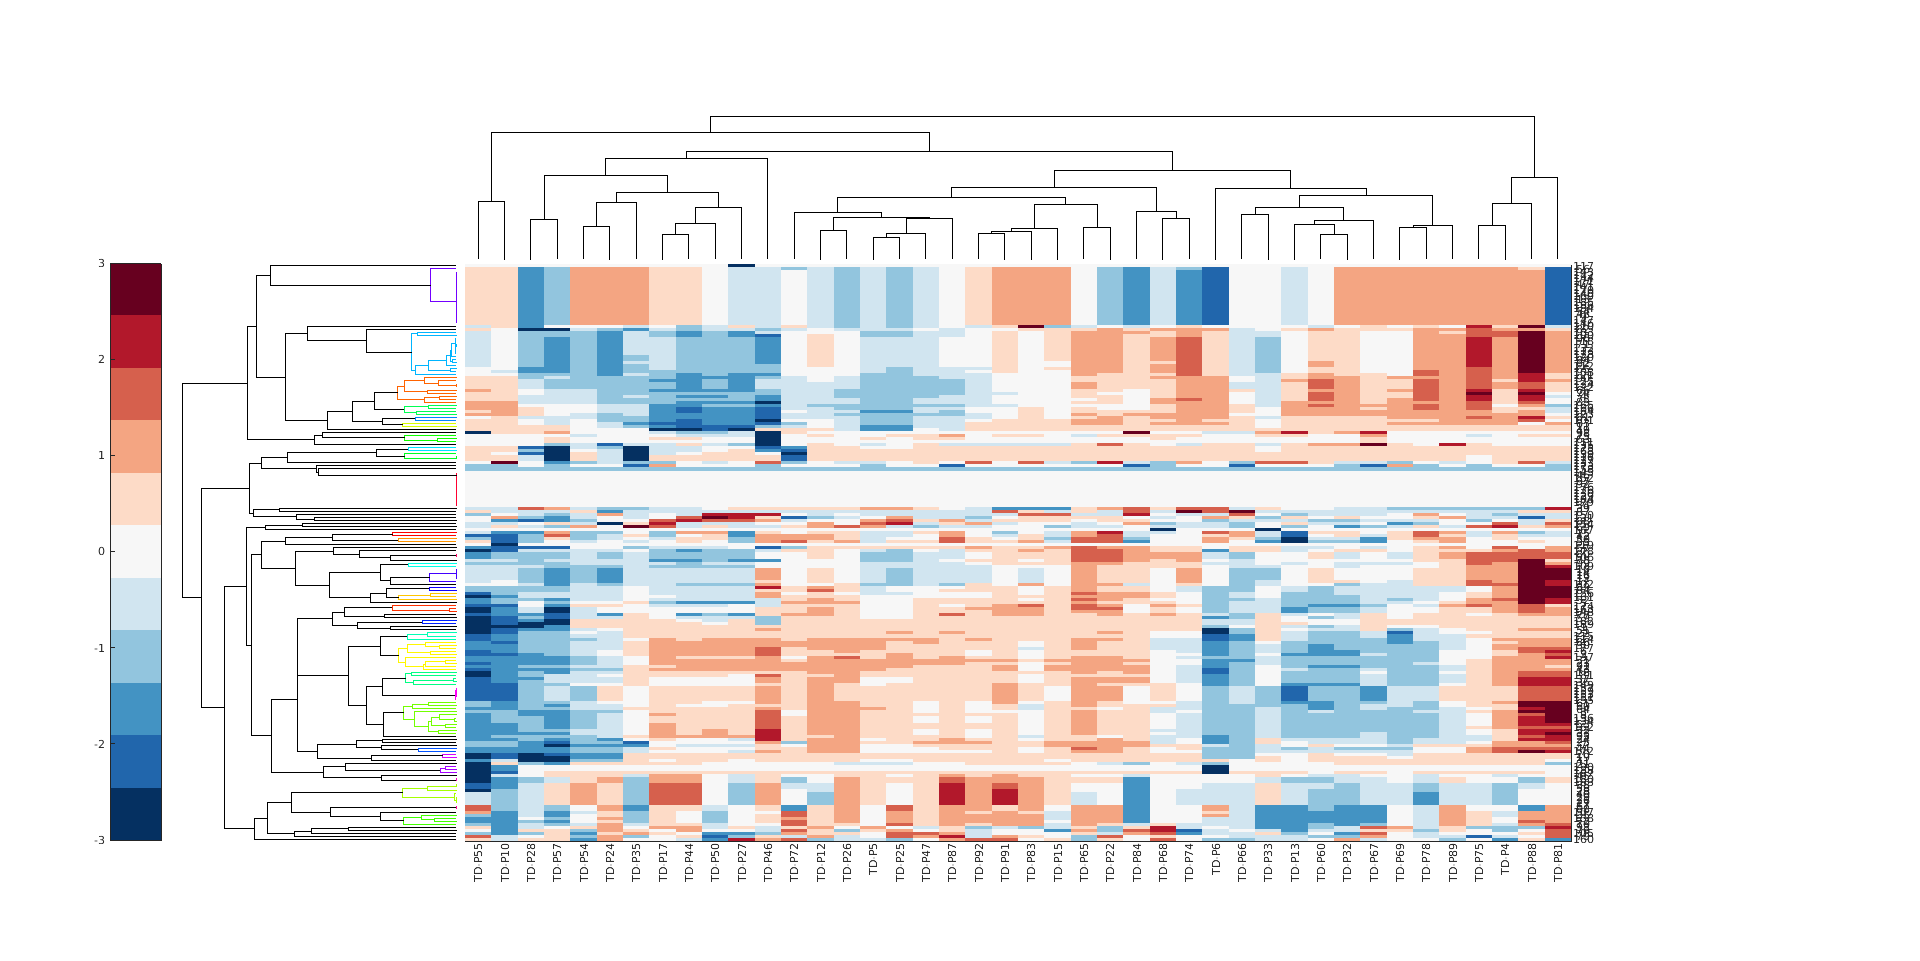


Figure S9: Heat map and dendrogram of the 190 metabolic tasks and trauma group D. Data standardized by column


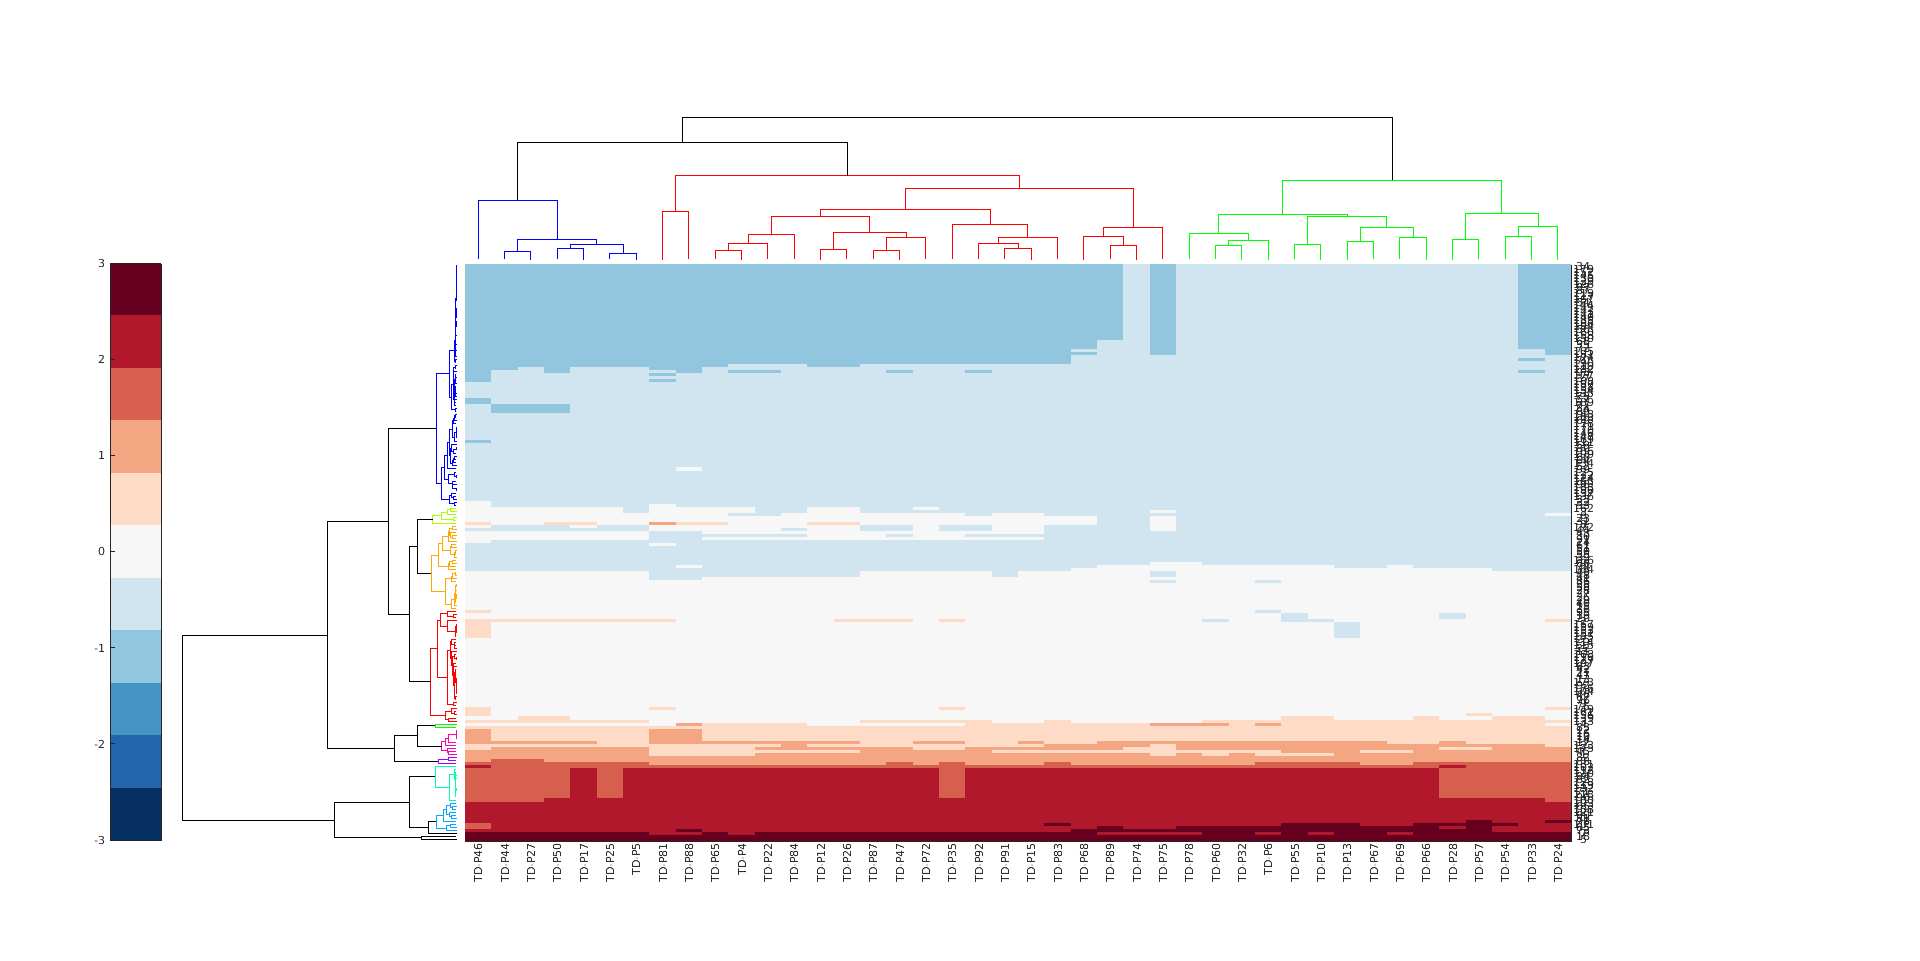


Figure S10: Heat map and dendrogram of the 190 metabolic tasks and trauma group D. Data standardized by row

- Clustering analysis of all patients and relevant tasks


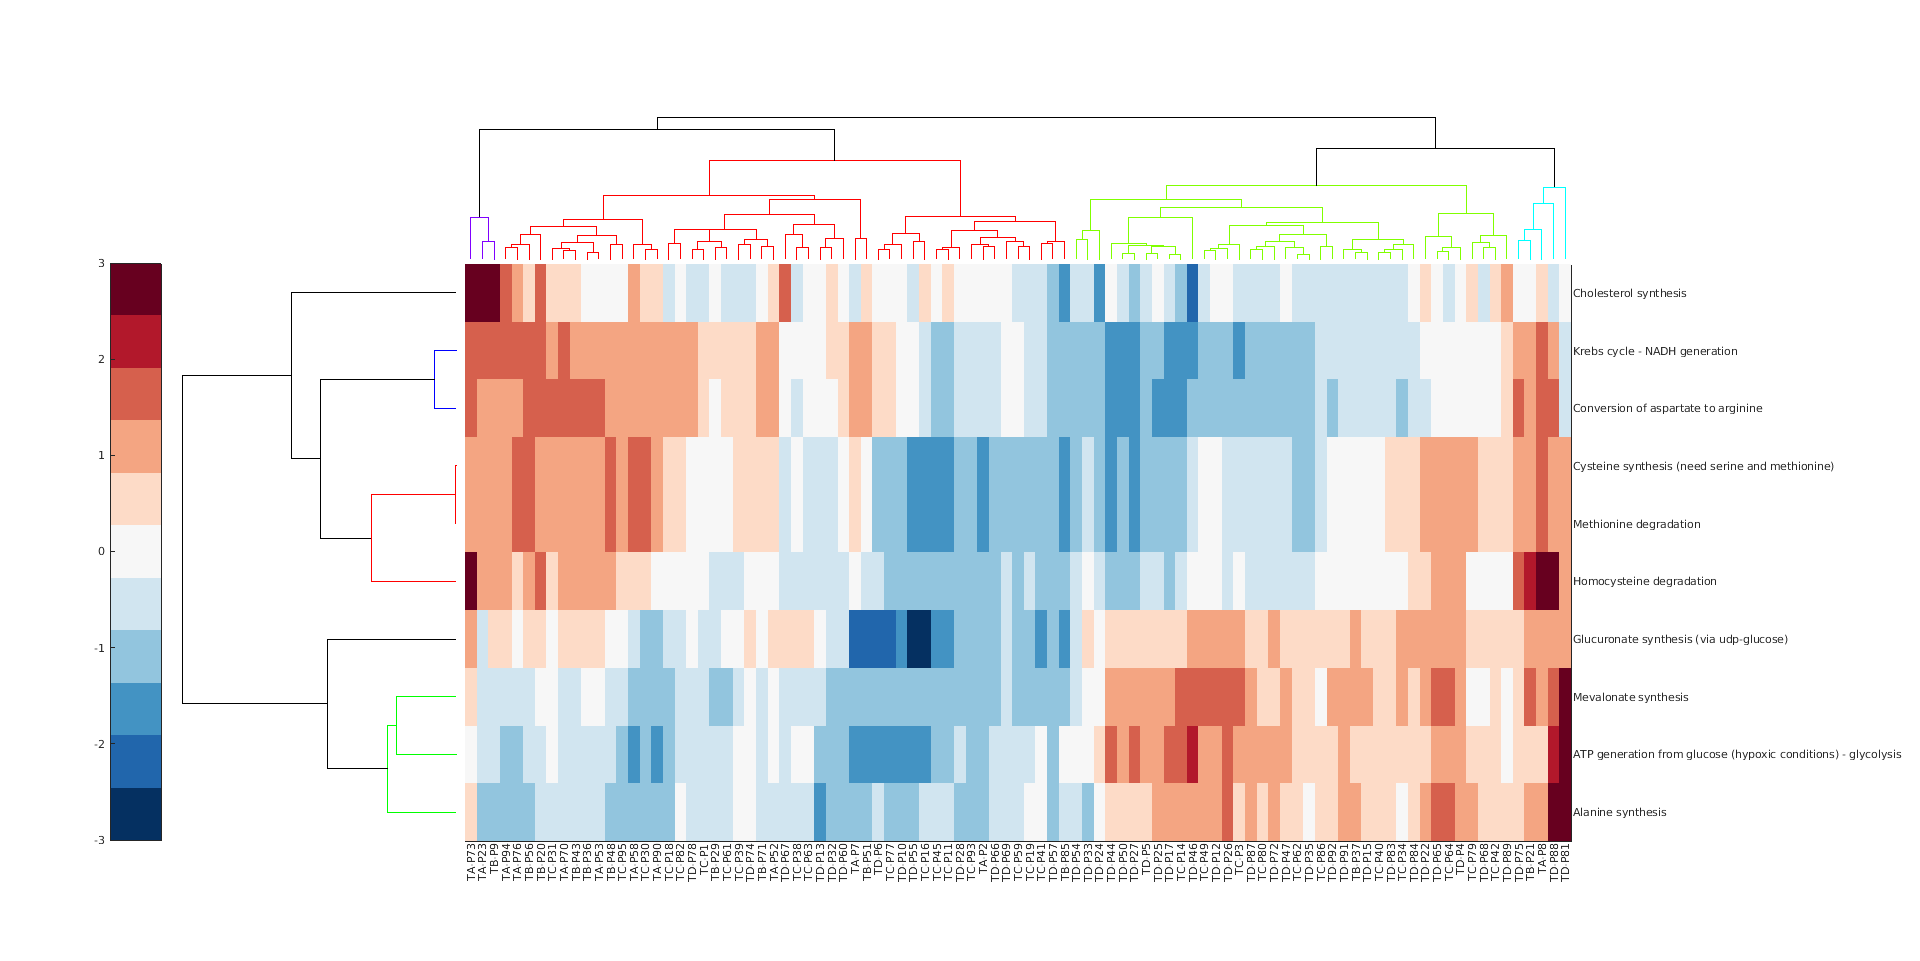
Figure S1: Heat map and dendrogram of 10 relevant metabolic tasks and 95 trauma patients. Data standardized by column
